# 1            **Meta-analysis reveals that the provision of multiple** 2            **ecosystem services requires a diversity of land covers**

3            **Carla Gómez-Creutzberg<sup>a,1</sup>, Malgorzata Lagisz<sup>b</sup>, Shinichi Nakagawa<sup>b</sup>, Eckehard G.**  
4            **Brockerhoff<sup>c,d</sup> and Jason M. Tylianakis<sup>a,e,1</sup>**

5            <sup>a</sup> Centre for Integrative Ecology, University of Canterbury, Christchurch 8140, New Zealand;  
6            <sup>b</sup> Evolution & Ecology Research Centre, School of Biological, Earth and Environmental  
7            Sciences, University of New South Wales, Sydney, NSW, 2052, Australia; <sup>c</sup> Scion (New  
8            Zealand Forest Research Institute), Christchurch 8440, New Zealand; <sup>d</sup> Swiss Federal  
9            Research Institute WSL, Zürcherstrasse 111, CH-8903 Birmensdorf, Switzerland (Present  
10           address); <sup>e</sup> Department of Life Sciences, Imperial College London, Silwood Park Campus,  
11           Ascot, Berkshire SL5 7PY, United Kingdom.

12           <sup>1</sup> To whom correspondence may be addressed. Email: [cgomezcre@gmail.com](mailto:cgomezcre@gmail.com) or  
13           [jason.tylianakis@canterbury.ac.nz](mailto:jason.tylianakis@canterbury.ac.nz)

## 14           **Author contributions**

- 15           • Conception and development of original project concept - JMT, EGB, CGC
- 16           • Securing funding for the project - JMT, EGB
- 17           • Study design - CGC, SN, ML, EGB, JMT
- 18           • Data acquisition - CGC, with input from JMT and EGB
- 19           • Data analysis - CGC, JMT, SN, ML
- 20           • Drafting of manuscript - CGC
- 21           • Revision and critical appraisal of the manuscript: JMT, SN, ML, EGB

22           **Classifications:** Biological Sciences, Social Sciences

## 23 **Abstract**

24 Land-use change creates acute trade-offs among ecosystem services that support  
25 wellbeing. We comprehensively assess trade-offs and synergies in ecosystem service  
26 provisioning across land covers. We systematically surveyed published literature (1970 –  
27 2015) for New Zealand, to quantify 1137 individual land cover - ecosystem services  
28 relationships for 473 service provision indicators across 17 services. For each service, we  
29 used a network meta-analysis to obtain quantitative estimates of provision from each land  
30 cover. Multivariate analyses of these estimates allowed us to compare 1) land covers in the  
31 provision of multiple services, and 2) services in terms of the different land covers that  
32 provide them. We found a significant trade-off in service provision between land covers  
33 with a high production intensity against those with extensive or no production; the former  
34 providing only a limited range of services. However, our results also indicate that optimal  
35 provision of multiple services is unlikely to be met by a single land cover, but requires a  
36 combination of multiple land covers in the landscape. When applied to land-use/land-cover  
37 planning, our approach reveals: 1) land covers that cluster together, and thus provide  
38 redundancy (and potentially resilience) in service production, and 2) land covers that are  
39 likely to exhibit complementary roles in service provision because they occur at opposite  
40 extremes of the multivariate service space. It also allows identification of service bundles  
41 that respond similarly to land cover. Actively incorporating findings from different  
42 disciplines into ecosystem services research can guide practitioners in shaping land  
43 systems that sustainably support human welfare.

44 **Keywords:** Ecosystem services, land-use planning, trade-off, network meta-analysis, land  
45 cover

## 46 **Introduction**

47 Human transformation of the Earth's surface through land-use activities has reached an  
48 unprecedented magnitude, and constitutes a major driver of global environmental change  
49 (1–3). Humans rely on resources appropriated through land use, however most of these  
50 practices affect the earth's ecosystems in ways that undermine human welfare (1).

51 Continued population growth (4) and growing per capita consumption of resources (5)  
52 make it critical to reconcile production and sustainability in land systems.

53 Ecosystem services offer a framework for addressing these complex issues in land-use  
54 planning and management by linking human welfare with ecosystems. They explicitly  
55 account for the benefits that ecosystems bring to society, and prioritize long-term welfare  
56 over immediate economic reward (6–9). This perspective encourages strategies that  
57 optimize service provision across different land uses or enhance the provision of multiple  
58 services within a single type of land use (10). To this end, important efforts have been  
59 made to map and quantify services and estimate their economic value (11–14) or to  
60 examine synergies and trade-offs in their spatial occurrence (15–21).

61 Despite these advances, our understanding of service trade-offs and synergies has  
62 traditionally been impaired by the lack of, and costliness of obtaining, spatial data on  
63 multiple ecosystem services from multiple land uses across landscapes. Recent efforts have  
64 addressed these problems, for example, by using satellite earth observation to assess  
65 service supply (22) or by examining ecosystem service bundles and their spatial  
66 distribution in relation to socio-ecological systems (23–26). However, these approaches are  
67 still limited by data availability, which generally constrains the assessment of each service  
68 to measurements of individual indicators that are often location-specific. Furthermore, in  
69 many cases these measurements may not necessarily convey information that can be  
70 readily used by decision-makers or the public, because, for example, they do not take full  
71 account of the differences in the spatial and temporal scales at which ecological and social  
72 systems operate (27) or their link with human welfare issues is not stated or  
73 communicated effectively (9, 28, 29). Thus, consistent generalizations regarding trade-offs  
74 among broad categories of land use (e.g., natural vs. production systems) or services (e.g.,  
75 those with local vs. global beneficiaries) remain elusive.

76 Data limitations also constrain the use of monetary valuation of ecosystem services as a  
77 means to assess synergies and trade-offs. Monetary values are particularly difficult to  
78 define for services that provide non-market benefits including those related to fair  
79 distribution and sustainability (28). Moreover, monetary values are not necessarily

80 relevant to all decisions (30, 31) and can have limited extrapolation to other locations (32)  
81 or be highly contested among certain groups (33, 34). This necessitates the development of  
82 alternative methods to provide decision makers with evidence that is well-suited to their  
83 needs, is based on readily-available data and can be extrapolated (9).

84 Here we present an approach to inform land-use decisions by assessing trade-offs and  
85 synergies in the provision of multiple ecosystem services across land covers (as a proxy for  
86 land use). We use New Zealand as a case study because the high levels of endemic flora and  
87 fauna and relatively recent introduction of large-scale intensive agriculture make  
88 conservation-production tensions particularly acute, and necessitate conservation  
89 strategies that go beyond protected areas (35). We derive quantitative evidence of land  
90 cover effects on ecosystem service provision from existing literature through a meta-  
91 analysis (SI Appendix 7 and SI Dataset 1). Unlike existing reviews and meta-analyses on  
92 ecosystem services (36–42), our work does not collate existing ecosystem service  
93 assessments. Rather, we synthesize primary biophysical research that compares land  
94 covers in relation to a large variety of measures that indicate the provision of a service,  
95 regardless of whether service terminology was used.

96 We use this comprehensive evidence base to detect land covers that may operate as  
97 ‘generalists’ (i.e. providing many services) or ‘specialists’ (i.e. providing just a few services).  
98 This allows us to determine whether landscapes require multiple land covers to provide a  
99 comprehensive suite of non-production services, or whether a single land cover (e.g., a  
100 natural habitat) can provide the majority. We also identify ecosystem service bundles  
101 (i.e. services that are provided by the same land cover type), and potential trade-offs  
102 among services that are best provided by different land covers. Subsequently, we test  
103 whether there is a systematic difference between exotic-species-dominated production and  
104 native non-production systems in their provisioning of service bundles. Due to potential  
105 tensions between service beneficiaries and providers (43, 44), we also test whether  
106 services with localized (e.g., soil formation) vs. global (e.g., climate regulation) benefits tend  
107 to flow from different land covers. If they do, then this could exacerbate the disconnect  
108 between beneficiaries and those who enable, maintain and restrict services (45). Finally,  
109 we present an example of how this information can be used to readily examine the effects

110 of land use or land cover trajectories or contrasting decisions on landscape-scale  
111 management of ecosystem service trade-offs.

## 112 **Methods**

113 Our systematic review was structured according to the “Guidelines for Systematic Review  
114 in Environmental Management” developed by the Collaboration for Environmental  
115 Evidence (46). We searched the literature for quantitative comparisons of two or more  
116 land uses in the provision of one or more ecosystem services within New Zealand. Our  
117 ecosystem service definitions were adapted from the Millennium Ecosystem Assessment  
118 (47), with a total of 35 services spanning across the provisioning, regulating, cultural and  
119 supporting categories (SI Appendix 1). Land uses, formally defined as the purposes to  
120 which humans put land into use (48), were captured in our research as land covers (SI  
121 Appendix 1), since these include units that are not directly used by humans and,  
122 consequently, correspond more closely with the actual experimental or sampling units of  
123 many of the documents in our search.

### 124 **Data collection, aggregation and calculation of effect sizes**

125 Full details of the search and screening process are described in SI Appendix 2; here we  
126 present a brief outline. We searched the Scopus database for titles, abstracts and keywords  
127 with at least one match in each of the 3 components that structured our search: 1) “New  
128 Zealand”, 2) land cover and land use terms and 3) ecosystem service terms (see SI  
129 Appendix 3 for the full search phrase). Land cover terms included all possible variations of  
130 “land use” and “land cover” as well as terms on specific land use and land covers (both  
131 generic and specific to New Zealand). The ecosystem services component drew upon the  
132 names of each service (and possible variations of these) but also included vocabulary  
133 describing processes and conditions that could reflect their provision at the site scale akin  
134 to individual land cover units. The search was finalized in December 2014, and was  
135 constrained to include documents published from 1970 onward, to be comparable with  
136 current land use regimes in New Zealand (49).

137 Our keyword search yielded 9,741 references, and an initial automated screening reduced  
138 these to 4,373 publications by removing references that only mentioned a single type of  
139 land cover or land use in their title, abstract and keywords. Publications with 2 or more  
140 land cover terms were scanned using Abstrackr, an interactive machine learning system for  
141 semi-automated abstract screening, often used in medical meta-analyses (50). By learning  
142 from the abstracts or words a user identifies as relevant during the screening process,  
143 Abstrackr can predict the likely relevance of unscreened abstracts and effectively assist in  
144 the exclusion of irrelevant ones (more details in SI Appendix 2).

145 Abstract screening yielded 914 relevant papers, which were passed on to a team of four  
146 reviewers for full-text assessment and data extraction. Studies that did not have replicated  
147 observations (as defined in SI Appendix 2) for any land covers were discarded, whereas  
148 studies that contained replication on some, but not all, of the land covers were kept and  
149 only data on the replicated land covers were extracted. Although we only included  
150 terrestrial land covers, ecosystem services provided by land but linked to a water body  
151 were included in our analysis. Full details of how the full-text selection criteria were  
152 applied can be found in SI Appendix 4. In total, we extracted data from 136 studies that  
153 passed all inclusion criteria (see SI Appendix 5 for bibliographic details of each study).

154 Information on the land covers, quantitative measures of ecosystem service provision,  
155 experimental design and bibliographic details for each study was collated in a database. To  
156 allow for comparability across studies, individual land covers described in each study were  
157 matched to the nearest category in New Zealand's Land Cover Database - LCDB (51). This  
158 classification system includes forest, shrubland and grassland areas of either  
159 predominantly native or exotic vegetation, as well as cropland and more artificial surfaces  
160 such as built-up surfaces and mining areas (SI Appendix 1).

161 Often, the same quantitative measure of service provision obtained from a study  
162 (indicators, presented in SI Dataset 1) would be relevant to more than one ecosystem  
163 service. We therefore assigned each indicator to one or more ecosystem services and  
164 defined the general direction of each indicator - ecosystem service relationship (i.e. by  
165 determining whether larger values of the indicator would generally reflect an increase or

166 decrease in service provision). This was done because the majority of the studies in our  
167 meta-analysis did not explicitly use 'ecosystem services' terminology. Instead, they  
168 measured environmental or ecological variables that could be used as indicators of  
169 ecosystem service provision, provided a conceptual link was defined between the indicator  
170 (e.g., annual water discharge of a catchment) and the corresponding service (provision of  
171 freshwater). Thematic experts (see Acknowledgements) were consulted for assigning  
172 indicators to services and determining the direction of the indicator - ecosystem service  
173 relationship when we could not readily define this. Although we recognize that the  
174 relationship between an indicator and a service may be non-linear (e.g., pollination  
175 services may saturate with large numbers of pollinators), in most cases it was not possible  
176 to establish a clearly defined non-linear function, so we assumed a linear relationship for  
177 all indicators.

178 Unique identifiers allowed us to define individual studies, regardless of whether they were  
179 published within a publication that spanned more than one study or across different  
180 publications (SI Appendix 2). Multiple measures from within the same replicate site were  
181 aggregated into a single value per replicate (see SI Appendix 2 for details). Methods for  
182 standardizing measures of variance are provided in SI Appendix 6.

183 We obtained a final database with information on 473 ecosystem service indicators among  
184 3105 pairwise comparisons of two land covers from 136 studies. A log Response Ratio was  
185 used as the effect measure for comparing pairs of land covers within each study and was  
186 standardized such that larger values always represented greater service provision in the  
187 numerator land cover relative to the denominator one (see SI Appendix 2 for this  
188 standardization and log Response Ratio variance calculations).

189 Studies with more than one indicator of a given service were aggregated to have the same  
190 weight as studies with only a single indicator (see SI Appendix 2). Subsequently, the total  
191 number of land cover comparisons in our final dataset of 136 studies was reduced from  
192 3105 to 1003 comparisons for individual services within single studies (See SI Dataset 2 for  
193 an overview of the final data).



## 194 **Data analysis**

195 Data analysis was conducted as a two stage process: we first examined the provision of  
196 each ecosystem service by different land covers, and then assessed the relationships among  
197 land covers in terms of multiple ecosystem services. For the first stage, we conducted a  
198 separate network meta-analysis (52) for each ecosystem service. Network meta-analysis  
199 allowed us to compare, for each ecosystem service, a wide array of land covers across  
200 different studies, even though we did not have data for direct comparisons among all  
201 combinations of land covers. Conventional meta-analysis compares 2 treatments at a time,  
202 using direct comparisons from each study. In contrast, a network meta-analysis can  
203 compare multiple (i.e. 3 or more) treatments simultaneously by using both direct evidence  
204 (studies comparing pairs of treatments) and indirect evidence derived from linking  
205 common treatments across different studies in a network of evidence (52). For example, if  
206 some studies show that land cover A is better than B in the provision of a service, and  
207 others provide direct evidence that B is better than C, then a network meta-analysis allows  
208 us to make the inference that A will also be better than C.

209 We conducted our network meta-analyses with the R package *Netmeta* (53), which offered  
210 a frequentist approach to calculate point estimates (and their corresponding 95%  
211 confidence intervals) of the effect of the different land covers on the provision of each  
212 ecosystem service. We used a random effects meta-analytic model to generate these  
213 estimates and their confidence intervals, both of which were then used to define  
214 probability scores (54) and examine how different land covers ranked in the provision of  
215 each ecosystem service. We used both rankings and point estimates to construct forest  
216 plots comparing all land covers to the high producing exotic grassland (which we defined  
217 as a baseline reference) in the provision of each service. We selected high producing exotic  
218 grasslands as the reference because it was the only land cover that was represented across  
219 all ecosystem services in our dataset.

220 Trade-offs and synergies in land cover effects across the whole suite of ecosystem services  
221 were then examined using hierarchical clustering of the network meta-analytic estimates.  
222 For this, we constructed a land cover by ecosystem services matrix (found in SI Appendix



223 7) using the estimated log Response Ratios of each land cover (relative to the high  
224 producing exotic grassland reference) in each service, as determined with the individual  
225 network meta-analyses (see forest plots in SI Appendix 10 for estimated ratios). Missing  
226 values in this matrix resulted from sets of land covers for which we had no information on  
227 a given service or could not infer the corresponding ratios.

228 For analysis, we selected the largest possible subsets of this matrix with no gaps. This  
229 resulted in two data subsets: a matrix of ten land covers by eight ecosystem services and  
230 another matrix with nine ecosystem services by eight land covers. The matrix with ten land  
231 covers was used to compare land covers in their provision of the eight services. This  
232 allowed us to explore how land-cover differences influence suites of services. The matrix  
233 with nine services was rotated to have services as rows (land covers as columns) and used  
234 to compare services in terms of the land covers that provide them. This allowed us to  
235 identify services that tended to be provided by different land covers and thus would likely  
236 be traded off with one another in land decisions. A dissimilarity matrix was then calculated  
237 from each of these matrices using the *daisy* function of the *cluster* package for R (55) with  
238 Euclidean distances. For the matrix with ten land covers, distances were based on land  
239 cover observations for each service, while for the rotated matrix with nine distances were  
240 based on service observations for each land cover. Each of the distance matrices was then  
241 used to perform hierarchical clustering (56) to identify groups of land covers and services  
242 exhibiting similar behavior.

243 Finally, we tested hypotheses on whether characteristics of the land covers and ecosystem  
244 services in our distance matrices explained the trends observed in each of the  
245 corresponding clusterings. Land covers were grouped under two categorical variables, one  
246 denoting the presence/absence of forest cover and another separating production land  
247 covers, dominated by exotic vegetation cover, from those with no production activities.  
248 Originally, we intended to compare land covers with a native vs. exotic vegetation cover  
249 separately from production vs. natural. However, we omitted the former category because,  
250 except for one, all land covers with exotic vegetation were production and all native covers  
251 had little or no production. We used a permutational multivariate analysis of variance

252 (PERMANOVA) to test whether these variables or their interaction explained between-  
253 land-cover differences in the provision of multiple ecosystem services.

254 Similarly, ecosystem services were classified into three categories according to the scale at  
255 which their benefits were perceived (locally within each land cover, regionally across  
256 neighboring land covers, or globally) and into three categories representing the biophysical  
257 domain to which the majority of indicators used to quantify the provision of each the  
258 service belonged to (biotic, hydrologic or edaphic). A PERMANOVA was applied to test  
259 whether scale or domain explained groupings of ecosystem services within the  
260 multidimensional space of service provisioning across land covers. We did not test for an  
261 interaction between these two variables because some combinations of factor levels were  
262 absent and we lacked sufficient degrees of freedom.

263 PERMANOVA analyses were conducted using the *adonis* function of the *vegan* package in R  
264 (57). Since variables are added sequentially in *adonis*, to be conservative we performed  
265 each PERMANOVA twice and swapped the order of the variables in the second iteration so  
266 that each variable was tested second, after controlling for any collinearity with the other  
267 predictor (i.e. adjusted sums of squares). The *betadisper* function of the *vegan* package was  
268 used to test the assumption of multivariate homogeneity of group dispersions, and all tests  
269 met this assumption. SI Appendix 8 presents the land covers and ecosystem service  
270 categories used in these analyses.

## 271 **Results**

### 272 **Data coverage**

273 The 136 studies in our database contributed data on 17 different ecosystem services and  
274 25 land covers (SI Appendix 9). All four categories of ecosystem services (47) were  
275 represented within our dataset. However, most studies examined regulating or supporting  
276 services, with 116 and 115 studies, respectively. Only 47 studies presented data on  
277 provisioning services and five on cultural ones. All of the services in the supporting  
278 category (habitat provision, nutrient cycling, soil formation, water cycling and primary  
279 production) are represented in our database. Only four land cover comparisons had more

280 than 20 studies (high producing exotic grassland vs. exotic forest, indigenous forest vs. high  
281 producing exotic grassland, short-rotation cropland vs. high producing exotic grassland  
282 and exotic forest vs. indigenous forest); whereas the remaining land cover pairs were  
283 represented by 10 or fewer studies each.

#### 284 **Land cover effects on individual ecosystem services**

285 SI Appendix 1 presents an overview of the evidence network and individual network meta-  
286 analyses for each of the 17 ecosystem services in our database. The results of the meta-  
287 analyses are expressed as forest plots (SI Appendix 10). For several services, the narrow  
288 confidence intervals in these forest plots reveal that land covers with native shrub, grass  
289 and forest vegetation (i.e. broadleaved indigenous hardwoods, indigenous forest,  
290 manuka/kanuka, matagouri or grey scrub and, in many cases, tall tussock grassland)  
291 tended to rank higher in their provision than the more intensive high-value production  
292 land covers (particularly short-rotation cropland and high-producing exotic grassland).  
293 Regulation of water timing and flows, water purification, freshwater provision and disease  
294 mitigation conformed to this general pattern. In these services, low producing grasslands  
295 (which comprise a mix of exotic and native vegetation) and exotic forests also perform  
296 relatively well and always rank within the top half of all land covers.

297 For habitat provision the difference between native vegetation and production systems  
298 was less important than the presence of open vs. woody vegetation cover. For this service,  
299 land covers with woody vegetation (sub-alpine shrubland, matagouri or grey scrub, exotic  
300 forest, broadleaved indigenous hardwoods and forest) ranked higher in their estimates of  
301 service provision than those with open covers (short-rotation cropland, depleted, tussock,  
302 low and high producing grasslands) or deciduous hardwoods. Meanwhile, primary  
303 production tended to be highest under production systems (e.g., exotic forest, cropland and  
304 high-intensity grassland) and lower in natural systems (e.g., low producing and tussock  
305 grassland, indigenous forest), rather than differing between forested and open covers;  
306 however, these trends were not statistically significant due to the wide and overlapping  
307 confidence intervals. Importantly, these results indicate that no single land cover provides

308 all services at a maximal level. Rather, in order to ensure flows of multiple services,  
309 multiple land covers will be required within the landscape.

310 The forest plots in SI Appendix 10 for primary production, erosion control, pest regulation,  
311 waste treatment, capture fisheries, ethical & spiritual values, pollination and regional &  
312 local climate regulation all present wide, overlapping confidence intervals for all or most of  
313 their estimates. This suggests non-significant differences in land-cover provision of these  
314 services. For some services, this could be due to small evidence bases, either in terms of  
315 few studies or few comparisons for specific land cover pairs within a network (which can  
316 be seen as large differences in link weights in the corresponding evidence networks, SI  
317 Appendix 10). In the case of erosion control, where the evidence base is formed by 22  
318 studies (SI Appendix 10), overlapping confidence intervals in the land covers with the  
319 greatest number of comparisons express high variability in service provision from these  
320 land covers and suggest that other factors besides land cover (e.g., slope, soil type) likely  
321 account for the differences in erosion control across the sites in all 22 studies.

## 322 **Land cover effects across multiple ecosystem services**

323 To explore how the above trends in the provision of individual services translate into  
324 trade-offs and synergies among suites of services and the land covers providing them, we  
325 conducted multivariate analyses on service provision across land covers. First, we  
326 examined whether groups of land covers played a similar role in the average provision of  
327 services and, conversely, whether groups of services responded similarly to differences in  
328 land cover.

### 329 *Differences among land covers in their provision of services*

330 When we focused on the subset of data with values for the greatest number of land covers  
331 across the maximum number of ecosystem services, we observed a gradient of land covers  
332 that separates those with lower production (and, generally, forest cover) from the high  
333 value production systems (Fig. 1). More specifically we can identify the following clusters:

- 334 • Cluster A - Fruit and vegetable production systems

- 335 • Cluster B - Intensive production systems: exotic forests (harvested and unharvested)  
336 and high production grasslands
- 337 • Cluster C - Indigenous forests (well-established or in advanced succession) and low  
338 production grasslands
- 339 • Cluster D - Tall tussock grasslands and deciduous hardwoods

340 The gradient from clusters A to C is consistent with the aforementioned trend of native  
341 land covers performing better in the services for which production land covers perform  
342 poorly and vice versa (see SI Appendix 10). These clusters provide an approach to identify  
343 the strongest trade-offs in service provision, such as that between the land covers in cluster  
344 C and those in clusters A and D (Fig. 1) with the latter specializing in biomass production,  
345 the formation of soil suitable for plant growth and fast water cycling rates, and the former  
346 being better suited for providing habitat, cycling nutrients and purifying, providing and  
347 regulating the flow of water. Larger differences in the height at which clusters separate  
348 from each other indicate greater differences in service provision. Consequently, in Fig. 1,  
349 clusters B and C (both with grasslands and forests) are more similar to each other in their  
350 provision of services than they are to clusters A or D. Likewise, B and C are more similar to  
351 each other (indicated by the lower branch point) than A and D are to each other.

352 The trade-off in service provision between production and non-production land covers was  
353 statistically significant (PERMANOVA, Pseudo  $F_{1,6} = 2.927$ , partial  $R^2 = 0.259$ ,  $p < 0.01$ ; see  
354 detailed results in SI Appendix 11). The assumption of homogeneous dispersion between  
355 both groups was met ( $F_{1,8} = 0.15$ ,  $p > 0.05$ ), suggesting that neither provides a greater range  
356 of ecosystem services among its different land covers. Conversely, the separation between  
357 forested and non-forested land covers did not significantly explain the distribution of land  
358 covers in service space (Pseudo  $F_{1,6} = 1.226$ , partial  $R^2 = 0.109$ ,  $p > 0.05$ ; see also SI  
359 Appendix 11) nor did the interaction between forested/non-forested and production/non-  
360 production (Pseudo  $F_{1,6} = 1.141$ , partial  $R^2 = 0.101$ ,  $p > 0.05$ ; SI Appendix 11).

#### 361 *Differences among ecosystem services in the land covers that provide them*

362 By clustering ecosystem services based on their provisioning in each land cover, we  
363 identified some services that tend to perform differently from each other and,

364 consequently, have their provision traded-off across land covers. This trade-off is acute for  
365 water-related services; most of these tend to occupy distinct spaces within the dendrogram  
366 with water cycling standing apart from all other services, water purification and freshwater  
367 provision in a separate cluster, and regulation of water timing and flows in a single branch  
368 close to global climate regulation and nutrient cycling (Fig. 2). The trade-off between water  
369 cycling and regulation of water timing and flows is likely because land covers that allow  
370 increased runoff and present low water retention (such as harvested forests, croplands and  
371 built-up areas) deliver more of the water cycling service than the land covers that promote  
372 soil water storage and, consequently, perform better under the regulation of water timing  
373 and flows service (e.g., broadleaved indigenous hardwoods, indigenous forests and low  
374 producing grasslands). Freshwater provision and water purification form a cluster because  
375 the water quality aspect of their provision was assessed with common indicators (SI  
376 Dataset 1) and in both cases greater service provision came from land covers contributing  
377 to enhanced water quality (such as tall tussock grassland and indigenous forest, SI  
378 Appendix 10).

379 In contrast to the water-related services, those more closely linked to the soil system  
380 (nutrient cycling and soil regulation) are found closer to each other in Fig. 2, and appear to  
381 be delivered similarly across land covers (see forest plots in SI Appendix 10). In our  
382 analysis, global climate regulation falls under this broad group of services and forms a tight  
383 cluster with nutrient cycling (Fig. 2). This is likely due to the indicators shared by both and  
384 a gap in our database with respect to the contribution of vegetation and livestock in  
385 greenhouse gas fluxes. Further research on these aspects should therefore allow for a more  
386 comprehensive quantification of the provision of this service across land covers and uses.

387 Neither the spatial scale of service provision (local, regional, global) nor the main  
388 biophysical domain of services (edaphic, hydrologic and vegetation) significantly affect the  
389 distribution of services in multidimensional 'land cover space'. When tested together as  
390 additive main effects in a model, we observed changes in the importance of each variable  
391 that depended on their order in the model (SI Appendix 11), suggesting collinearity  
392 between the two predictors. When each was tested after removing the partial effect of the  
393 other (i.e. as second in the model), neither the biophysical domain of services

394 (PERMANOVA, Pseudo  $F_{2,4} = 2.253$ , partial  $R^2 = 0.312$ ,  $p > 0.05$ ; see also SI Appendix 11) or  
395 spatial scale of service provision (PERMANOVA, Pseudo  $F_{2,4} = 2.337$ , partial  $R^2 = 0.323$ ,  $p >$   
396  $0.05$ ; SI Appendix 11) independently explained significant variation in the distribution of  
397 services in multidimensional space. In Fig. 2, the only services of similar scale that cluster  
398 together are freshwater provision and water purification, which deliver benefits at regional  
399 scales and, as mentioned before, share some of their indicators and responses to these  
400 indicators. The two other services which form a tight cluster in Fig. 2 (nutrient cycling and  
401 global climate regulation) also have common indicators (pertaining to microbial  
402 respiration and carbon dioxide fluxes in the soil) to which they respond similarly, despite  
403 their benefits being experienced at different scales.

## 404 Discussion

405 Our meta-analysis revealed a clear difference between high - value production land covers,  
406 which specialize mainly in services relating to primary productivity, and all the land covers  
407 with native shrub or forest vegetation. Together, land covers with native vegetation  
408 outperformed production ones in the provision of most supporting and regulating services.  
409 However, in New Zealand production land covers are dominant, with exotic forests, high  
410 producing exotic grasslands, croplands, and orchards/vineyards occupying 42% of the  
411 country's terrestrial area in 2012 (58). Ecosystem service assessments were conceived, in  
412 part, to make explicit how decisions on ecosystem management reflect preferences for  
413 different, competing sets of services (7, 59). The trade-off we find between production and  
414 native land covers illustrates how the provision of services with a high market value and  
415 short-term returns occurs at the expense of services that have a non-market value but are  
416 essential for sustained, long-term human welfare (60).

417 The above findings resonate with the recommendations of Foley and colleagues (61) with  
418 respect to halting indiscriminate expansion of agriculture into sensitive ecosystems.  
419 However, our findings also suggest that, at the landscape scale, the dichotomy between  
420 production and non-production land covers is not solved with a single 'generalist' native  
421 land cover. Even for the services that were best delivered by land covers with native  
422 vegetation, we did not find evidence of a single land cover consistently performing better



423 than the rest in providing all of the services. Instead, our findings show that while  
424 indigenous forests tend to perform well in the provision of most services (particularly  
425 erosion control, waste treatment, disease mitigation and global, regional and local climate  
426 regulation), in many services they are outperformed by other land covers such as native  
427 shrubland (manuka and or kanuka, which contribute very well to soil formation and  
428 regulation of water timing and flows), tall tussock grasslands (which are well suited to  
429 freshwater provision, water purification and pest regulation) and even advanced  
430 successional forest (broadleaved indigenous hardwoods, which rank high in regulation of  
431 water timing and flows, nutrient cycling and habitat provision). Therefore, a landscape  
432 with a mosaic of these land covers is more likely to offer a broader suite of services than  
433 one dominated by large extents of any single native land cover (62–64).

434 Thus, we support earlier recommendations to extend beyond the dichotomy of  
435 conservation vs. production land into a more a comprehensive management (65–67). Such  
436 management could, for example, contemplate the extension or restoration of under-  
437 represented native land uses at strategic sites where intensive use is not matched by  
438 increased production yield, to promote provision of critical services or broaden the existing  
439 suite. To this end, management will need to be informed by a comprehensive  
440 understanding of how services can scale up from individual land use units and how the  
441 relative sizes of different land use units within a landscape can affect service provision.

442 Our analysis shows that low intensity-production land covers that retain some native  
443 vegetation (i.e. the low producing grasslands in our dataset) can approach native land  
444 covers (broadleaved indigenous hardwoods and indigenous forests) in terms of overall  
445 service provision. These low-intensity production land covers demonstrate that production  
446 and a suite of other services can be jointly delivered, providing empirical support to the  
447 notion of managed ecosystems with “restored” services proposed by Foley et al. (1).

448 Importantly, we identified great variability in the effect of some land covers on the  
449 provision of certain services, despite there being high replication in our evidence base for  
450 these effects (e.g., water purification by short-rotation croplands and erosion control by  
451 high producing exotic grasslands, indigenous and exotic forests). This suggests that local  
452 environmental conditions and management practices can significantly alter how a given

453 land use affects service provision (68), which implies some potential to improve service  
454 provision by adjusting management practices of specific land uses (69–71). Within  
455 individual land uses, decisions on which practices to adopt will require detailed research  
456 on the effects of different management regimes on service provision, as well as an  
457 understanding of the extent to which the plasticity in service provision is constrained (or  
458 favored) by environmental factors.

459 A critical challenge in applying the ecosystem services framework to spatial and  
460 environmental planning is understanding the extent to which different land uses affect the  
461 provision of services (72). The uneven coverage of different services that we observed in  
462 the literature reflects both the variable ease of quantifying different services and the likely  
463 relevance of comparing provision of a given service among land uses. Within our dataset,  
464 supporting and regulating services are best represented. In the global literature, regulating  
465 services are also the most commonly quantified and mapped category, however, they are  
466 usually followed by provisioning services while the evidence on supporting services is  
467 scarce (11, 13, 14, 36, 38, 73). The limited representation of provisioning services in our  
468 dataset possibly occurred because most provisioning services (e.g., milk, timber) are linked  
469 to single or few land covers and, consequently, are unlikely to be compared across land  
470 covers. Such services, however, enter the market directly and can be more readily  
471 quantified in monetary terms. In contrast, the supporting and regulating services that  
472 predominate in our dataset usually translate to externalities in the context of production  
473 systems and are likely more readily quantified through biophysical indicators than  
474 monetary units (36, 74).

475 Cultural services are poorly represented in our database, with the few indicators for this  
476 category all being shared with the capture fisheries provisioning service, because they  
477 pertain to eels, which are of cultural significance to Māori in New Zealand. As has been  
478 argued elsewhere (75), cultural ecosystem services have non-material and ideological  
479 dimensions that are not readily quantified and, thus, are not well represented even within  
480 the emerging body of specialized literature on ecosystem service provision assessment  
481 (76). Moreover, it has been suggested that cultural services escape the instrumental value  
482 domain present in the ecosystem services framework. Instead, they fall under the relational

483 domain, whereby value is not solely defined in terms of the direct benefits we can derive  
484 from an ecosystem, but also in terms of the social webs of desired and actual relationships  
485 we construct around that ecosystem or its components (33). Consequently, for these  
486 services, a quantitative approach like ours should be complemented with assessments that  
487 address the relational dimensions of the values people hold for the natural elements in  
488 different land uses to better represent their importance in a cultural context (77).

489 Individual services are defined to encompass distinct processes and values, but these are  
490 often quantified by overlapping sets of indicators (74). For example, in our dataset  
491 indicators of water and soil pertained to more than one service (e.g., water purification and  
492 provision of freshwater both share indicators of water quality, while erosion control and  
493 soil formation share indicators on soil stability). Since the MEA was released, there have  
494 been initiatives to redefine services and their categories (78, 79); here we argue that future  
495 work in determining how to best quantify services and their spatio-temporal variation will  
496 be at least as important as refining their taxonomy. Furthermore, if a focus on quantifying  
497 ecosystem services should reveal aspects of services that are best left unquantified (such as  
498 the relational domain of cultural services), this could also lead to the development of  
499 alternative ways of assessing those services, which could then be applied in combination  
500 with quantitative approaches like the one we have developed here. Recent developments,  
501 like the concept of nature's contributions to people and the framework for their  
502 assessment proposed by Díaz and colleagues (80), provide an opportunity for reconciling  
503 these aspects.

504 Our work suggests that there is great potential in using existing data for assessing trade-  
505 offs in ecosystem service provision more cost-efficiently than through direct field  
506 observation and, moreover, that conceptual improvements in service quantification could  
507 greatly improve our ability to exploit this potential. An important caveat in our approach  
508 stems from underlying factors that are correlated with land cover and use and impact the  
509 provision of certain services. For example, steep slopes are frequently found in some land  
510 covers and land uses (like forestry and natural habitats) and would influence erosion  
511 control. Within our work the effect of these factors on service provision has not been  
512 separated from that of land cover. In fact, one could argue that land use is not selected

513 independently from the local environment, so these factors are a component of any land  
514 use and its influence on services. Nevertheless, future approaches may benefit from  
515 examining how these factors affect the between- or within-land-use differences in service  
516 provision. This distinction would allow a shift from comparisons across locations (as we  
517 examined here) to the predicted impacts of land use change on services at any location.  
518 However, such predictions would need to incorporate legacy effects of past land uses, as  
519 these can have enduring consequences on ecosystem functioning (81, 82).

520 Likewise, we do not examine whether it is land covers or land uses that best capture the  
521 full range of benefits from each ecosystem service. Identifying whether there are any  
522 differences in the benefits captured by land cover over land use categorizations, may help  
523 inform the selection of either in future assessments. Moreover, some ecosystem service  
524 benefits may not be captured by neither land cover nor land use, but by other spatially  
525 variable factors (e.g., slope influences housing views which informs aesthetic values). These  
526 factors were beyond the scope of our work, however assessments that aim to capture the  
527 full range of ecosystem service benefits will likely need to include these factors in addition  
528 to land cover / land use.

529 Overall, we have presented a method for using existing data to assess trade-offs and  
530 synergies in service provision across land covers. This approach can facilitate the  
531 comparison of entire landscapes in the provision of multiple ecosystem services.  
532 Quantitative measures of how multiple land covers provide ecosystem services generated  
533 with our review (or land uses from equivalent exercises) can be used to map land covers or  
534 land uses into the multidimensional service space (Fig. 3). This mapping could reveal two  
535 key characteristics for land-use planning: 1) land covers/uses that cluster together, and  
536 thus exhibit redundancy (and potentially resilience) in service provision, or 2) land  
537 covers/uses that occur at opposite extremes of service space, and are therefore likely to  
538 exhibit complementary roles in their service provision (as services are traded off between  
539 them). In addition, the total hyper-volume occupied by all land covers/uses in this  
540 multidimensional service space (ordination plots in Fig. 3) can indicate the diversity of  
541 services provided by the full set of land covers/uses within a given landscape, which could  
542 be used in comparisons of existing landscapes or future scenarios.

543 As an example, the cases in Fig. 3 show how increasing the number of land covers within a  
544 landscape results in a corresponding increase in the diversity of services provided by that  
545 landscape. Case 3, with the greatest diversity of land covers, occupies the greatest hyper-  
546 volume in multidimensional service space. However, most of the land covers at the edge of  
547 this volume exhibit low redundancy, in contrast to the land covers in Case 2 that cluster  
548 around one portion of the ordination plot (and thus provide redundancy in the delivery of  
549 that set of services). Note that no landscape is likely to ever occupy a hyper-volume that  
550 extends through the entire service space, since some areas of this space may not  
551 correspond to any actual configuration of existing services. Therefore this approach is best  
552 applied for comparing existing and/or potential land cover (or land use) configurations  
553 against each other, rather than for assessing individual cases with no reference of the  
554 diversity of land covers that could actually be achieved in that landscape.

555 Similarly, mapping ecosystem services in multidimensional land-cover or land-use space  
556 (e.g., Fig. 2) allows the identification of bundles of services that respond similarly to land  
557 cover / land use. These bundles can then be used to identify management decisions that  
558 minimize disruption of service flows. Our approach opens the way for actively  
559 incorporating existing sources of information into ecosystem services research and  
560 informing practitioners to shape land systems that sustainably support human welfare.

## 561 **Acknowledgements**

562 We thank Melanie Hamzah for her assistance in the abstract screening and Sol Heber,  
563 Sophie Hunt, Jessica Furlong & Matthew Scott for their help with the full-text assessment  
564 and data extraction to collate our dataset. We also thank thematic experts Karen L. Adair  
565 (soil microbiology), Catherine M. Febria (freshwater ecology), Leo Condrón (soil  
566 biogeochemistry), Matthew Turnbull (plant physiological ecology) & Angus McIntosh  
567 (freshwater ecology) for help with interpreting potential ecosystem service indicators. We  
568 are grateful to Daniel Stouffer and Melissa Ann Broussard for their valuable technical  
569 advice and members of the Stouffer and Tylianakis lab for comments and useful  
570 discussions. This work was funded by the Ministry of Business, Innovation and  
571 Employment, NZ programme BEST: Building biodiversity into an ecosystem service-based

572 approach for resource management C09X1307. We thank Suzie Greenhalgh for  
573 coordinating this programme and providing helpful discussions.

## 574 **References**

- 575 1. Foley JA, et al. (2005) Global Consequences of Land Use. *Science* 8(July):570–574.
- 576 2. Steffen W, et al. (2015) Planetary boundaries: Guiding human development on a  
577 changing planet. *Science* 347(6223):1259855–1259855.
- 578 3. Turner B, Lambin EF, Reenberg A (2008) The emergence of land change science for  
579 global environmental change and sustainability. *Proceedings of the National Academy of*  
580 *Sciences* 105(7):20666–20671.
- 581 4. UNADES (2017) *World Population Prospects: The 2017 Revision, Key Findings and*  
582 *Advance Tables* (United Nations).
- 583 5. Godfray HCJ, et al. (2010) Food Security: The Challenge of Feeding 9 Billion People.  
584 *Science* 327(February):812–818.
- 585 6. Costanza R, et al. (1997) The value of the world’s ecosystem services and natural capital.  
586 *Nature* 387(6630):253–260.
- 587 7. Costanza R, et al. (2014) Changes in the global value of ecosystem services. *Global*  
588 *Environmental Change* 26:152–158.
- 589 8. Daily GC, Alexander S, Ehrlich P (1997) *Ecosystem services: benefits supplied to human*  
590 *societies by natural ecosystems* (Ecological Society of America, Washington DC) Available at:  
591 <http://www.esa.org/esa/wp-content/uploads/2013/03/issue2.pdf>.
- 592 9. Guerry AD, et al. (2015) Natural capital and ecosystem services informing decisions:  
593 From promise to practice. *Proceedings of the National Academy of Sciences* 112(24):7348–  
594 7355.
- 595 10. Lambin EF, Meyfroidt P (2011) Global land use change, economic globalization, and the  
596 looming land scarcity. *Proceedings of the National Academy of Sciences* 108(9):3465–3472.

- 597 11. Crossman ND, et al. (2013) A blueprint for mapping and modelling ecosystem services.  
598 *Ecosystem Services* 4:4–14.
- 599 12. Groot RS de, et al. (2012) Global estimates of the value of ecosystems and their services  
600 in monetary units. *Ecosystem Services* 1(1):50–61.
- 601 13. Egoh B, et al. (2012) *Indicators for mapping ecosystem services: a review* (Publications  
602 Office of the European Union, Luxembourg).
- 603 14. Martínez-Harms MJ, Balvanera P (2012) Methods for mapping ecosystem service  
604 supply: a review. *International Journal of Biodiversity Science, Ecosystem Services &*  
605 *Management* 8(1-2):17–25.
- 606 15. Bateman IJ, et al. (2013) Bringing ecosystem services into economic decision-making:  
607 land use in the United Kingdom. *Science* 341(6141):45–50.
- 608 16. Chan KMA, Shaw MR, Cameron DR, Underwood EC, Daily GC (2006) Conservation  
609 planning for ecosystem services. *PLoS biology* 4(11):e379.
- 610 17. Naidoo R, et al. (2008) Global mapping of ecosystem services and conservation  
611 priorities. *Proceedings of the National Academy of Sciences of the United States of America*  
612 105(28):9495–500.
- 613 18. Queiroz C, et al. (2015) Mapping bundles of ecosystem services reveals distinct types of  
614 multifunctionality within a Swedish landscape. *Ambio* 44(1):89–101.
- 615 19. Qiu J, Turner MG (2013) Spatial interactions among ecosystem services in an  
616 urbanizing agricultural watershed. *Proceedings of the National Academy of Sciences of the*  
617 *United States of America* 110(29):12149–12154.
- 618 20. Remme RP, Schröter M, Hein L (2014) Developing spatial biophysical accounting for  
619 multiple ecosystem services. *Ecosystem Services* 10:6–18.
- 620 21. Willemsen L, Hein L, Mensvoort ME van, Verburg PH (2010) Space for people, plants, and  
621 livestock? Quantifying interactions among multiple landscape functions in a Dutch rural  
622 region. *Ecological Indicators* 10(1):62–73.



- 623 22. Cord AF, et al. (2017) Priorities to Advance Monitoring of Ecosystem Services Using  
624 Earth Observation. *Trends in Ecology & Evolution* 32(6):416–428.
- 625 23. Raudsepp-Hearne C, Peterson GD, Bennett EM (2010) Ecosystem service bundles for  
626 analyzing tradeoffs in diverse landscapes. *Proceedings of the National Academy of Sciences*  
627 *of the United States of America* 107(11):5242–5247.
- 628 24. Turner KG, Odgaard MV, Bøcher PK, Dalgaard T, Svenning JC (2014) Bundling  
629 ecosystem services in Denmark: Trade-offs and synergies in a cultural landscape.  
630 *Landscape and Urban Planning* 125:89–104.
- 631 25. Van der Biest K, et al. (2013) EBI-An Index for Delivery of Ecosystem Service Bundles  
632 Ecological Indicators. *Ecosystem Services: Global Issues, Local Practices* 37:263–272.
- 633 26. Yang G, et al. (2015) Using ecosystem service bundles to detect trade-offs and synergies  
634 across urban-rural complexes. *Landscape and Urban Planning* 136:110–121.
- 635 27. Birkhofer K, et al. (2015) Ecosystem services - current challenges and opportunities for  
636 ecological research. *Frontiers in Ecology and Evolution* 2(January):1–12.
- 637 28. Costanza R, et al. (2017) Twenty years of ecosystem services: How far have we come  
638 and how far do we still need to go? *Ecosystem Services* 28:1–16.
- 639 29. Olander L, et al. (2017) So you want your research to be relevant? Building the bridge  
640 between ecosystem services research and practice. *Ecosystem Services* 26:170–182.
- 641 30. Parks S, Gowdy J (2013) What have economists learned about valuing nature? A review  
642 essay. *Ecosystem Services* 3:e1–e10.
- 643 31. Gómez-Baggethun E, Ruiz-Pérez M (2011) Economic valuation and the commodification  
644 of ecosystem services. *Progress in Physical Geography* 35(5):613–628.
- 645 32. Schmidt S, Manceur AM, Seppelt R (2016) Uncertainty of monetary valued ecosystem  
646 services - value transfer functions for global mapping. *PLoS ONE* 11(3):e0148524.
- 647 33. Chan KMA, et al. (2016) Opinion: Why protect nature? Rethinking values and the  
648 environment. *Proceedings of the National Academy of Sciences* 113(6):1462–1465.

- 649 34. McCauley DJ (2006) Selling out on nature. *Nature* 443(7107):27–28.
- 650 35. Craig J, et al. (2000) Conservation Issues in New Zealand. *Annual Review of Ecology,*  
651 *Evolution and Systematics* 31:61–78.
- 652 36. Howe C, Suich H, Vira B, Mace GM (2014) Creating win-wins from trade-offs? Ecosystem  
653 services for human well-being: A meta-analysis of ecosystem service trade-offs and  
654 synergies in the real world. *Global Environmental Change* 28(1):263–275.
- 655 37. Lee H, Lautenbach S (2016) A quantitative review of relationships between ecosystem  
656 services. *Ecological Indicators* 66:340–351.
- 657 38. Malinga R, Gordon LJ, Jewitt G, Lindborg R (2015) Mapping ecosystem services across  
658 scales and continents - A review. *Ecosystem Services* 13:57–63.
- 659 39. Nieto-Romero M, Oteros-Rozas E, González Ja, Martín-López B (2014) Exploring the  
660 knowledge landscape of ecosystem services assessments in Mediterranean  
661 agroecosystems: Insights for future research. *Environmental Science & Policy* 37:121–133.
- 662 40. Seppelt R, Dormann CF, Eppink FV, Lautenbach S, Schmidt S (2011) A quantitative  
663 review of ecosystem service studies: Approaches, shortcomings and the road ahead. *Journal*  
664 *of Applied Ecology* 48(3):630–636.
- 665 41. Quintas-Soriano C, et al. (2016) Ecosystem services values in Spain: A meta-analysis.  
666 *Environmental Science and Policy* 55:186–195.
- 667 42. Reynaud A, Lanzanova D (2017) A Global Meta-Analysis of the Value of Ecosystem  
668 Services Provided by Lakes. *Ecological Economics* 137:184–194.
- 669 43. Leimona B, Noordwijk M van, Groot RS de, Leemans R (2015) Fairly efficient, efficiently  
670 fair: Lessons from designing and testing payment schemes for ecosystem services in Asia.  
671 *Ecosystem Services* 12:16–28.
- 672 44. Vatn A (2010) An institutional analysis of payments for environmental services.  
673 *Ecological Economics* 69(6):1245–1252.

- 674 45. Syrbe R-U, Grunewald K (2017) Ecosystem service supply and demand – the challenge  
675 to balance spatial mismatches. *International Journal of Biodiversity Science, Ecosystem*  
676 *Services & Management* 13(2):148–161.
- 677 46. CEE (2013) *Guidelines for Systematic Review and Evidence Synthesis in Environmental*  
678 *Management - Version 4.2* (Centre for Evidence Based Conservation).
- 679 47. MEA (2005) *Ecosystems and human well-being: Synthesis* (Island Press, Washington)  
680 Available at: <http://www.who.int/entity/globalchange/ecosystems/ecosys.pdf>.
- 681 48. Dale VH, et al. (2000) Ecological Principles and Guidelines for Managing the Use of  
682 Land. *Ecological Applications* 10(3):639–670.
- 683 49. MacLeod CJ, Moller H (2006) Intensification and diversification of New Zealand  
684 agriculture since 1960: An evaluation of current indicators of land use change. *Agriculture,*  
685 *Ecosystems and Environment* 115(1-4):201–218.
- 686 50. Wallace BC, Small K, Brodley CE, Lau J, Trikalinos TA (2012) Deploying an interactive  
687 machine learning system in an evidence-based practice center. *Proceedings of the 2nd ACM*  
688 *SIGHIT symposium on International health informatics - IHI '12*:819.
- 689 51. Thompson S, Grüner I, Gapare N (2003) *Illustrated Guide to Target Classes of the New*  
690 *Zealand Land Cover Database Version 2* (New Zealand Ministry for the Environment).
- 691 52. Salanti G (2012) Indirect and mixed-treatment comparison, network, or multiple-  
692 treatments meta-analysis: many names, many benefits, many concerns for the next  
693 generation evidence synthesis tool. *Research Synthesis Methods* 3(2):80–97.
- 694 53. Schwarzer G, Rücker G, Krahn U, König J (2017) Package ‘netmeta’ - A comprehensive  
695 set of functions providing frequentist methods for network meta-analysis. Available at:  
696 <https://cran.r-project.org/web/packages/netmeta/index.html>.
- 697 54. Rücker G, Schwarzer G (2015) Ranking treatments in frequentist network meta-  
698 analysis works without resampling methods. *BMC Medical Research Methodology* 15(1):58.

- 699 55. Maechler M, et al. (2017) Package Cluster - "Finding Groups in Data": Cluster Analysis  
700 Extended. Available at: <https://cran.r-project.org/web/packages/cluster/index.html>.
- 701 56. R Core Team (2018) R: A language and environment for statistical computing. Available  
702 at: <https://www.r-project.org/>.
- 703 57. Oksanen J, et al. (2017) Package 'vegan'. Available at: [https://cran.r-](https://cran.r-project.org/web/packages/vegan/index.html)  
704 [project.org/web/packages/vegan/index.html](https://cran.r-project.org/web/packages/vegan/index.html).
- 705 58. Landcare Research (2015) Land Cover Database version 4.1, Mainland New Zealand.  
706 Available at: <http://www.lcdb.scinfo.org.nz/home>.
- 707 59. Balvanera P, et al. (2012) Ecosystem services research in Latin America: The state of  
708 the art. *Ecosystem Services* 2:56–70.
- 709 60. Rodríguez-Loinaz G, Alday JG, Onaindia M (2015) Multiple ecosystem services  
710 landscape index: A tool for multifunctional landscapes conservation. *Journal of*  
711 *Environmental Management* 147:152–163.
- 712 61. Foley JA, et al. (2011) Solutions for a cultivated planet. *Nature* 478(7369):337–342.
- 713 62. Eastburn DJ, O'Geen AT, Tate KW, Roche LM (2017) Multiple ecosystem services in a  
714 working landscape. *PLoS One* 12(3):e0166595.
- 715 63. Fischer J, Lindenmayer DB, Manning AD (2006) Biodiversity, ecosystem function and  
716 resilience: Ten guiding principles for off-reserve conservation. *Frontiers in Ecology and the*  
717 *Environment* 4:80–86.
- 718 64. Law EA, et al. (2015) Better land-use allocation outperforms land sparing and land  
719 sharing approaches to conservation in Central Kalimantan, Indonesia. *Biological*  
720 *Conservation* 186:276–286.
- 721 65. Grau R, Kuemmerle T, Macchi L (2013) Beyond 'land sparing versus land sharing':  
722 Environmental heterogeneity, globalization and the balance between agricultural  
723 production and nature conservation. *Current Opinion in Environmental Sustainability*  
724 5(5):477–483.

- 725 66. Mora C, Sale PF (2011) Ongoing global biodiversity loss and the need to move beyond  
726 protected areas: A review of the technical and practical shortcomings of protected areas on  
727 land and sea. *Marine Ecology Progress Series* 434:251–266.
- 728 67. Tscharntke T, Klein AM, Kruess A, Steffan-Dewenter I, Thies C (2005) Landscape  
729 perspectives on agricultural intensification and biodiversity - ecosystem service  
730 management. *Ecology Letters* 8(8):857–874.
- 731 68. Holland RA, et al. (2011) The influence of temporal variation on relationships between  
732 ecosystem services. *Biodiversity and Conservation* 20(14):3285–3294.
- 733 69. Guerra CA, Pinto-Correia T (2016) Linking farm management and ecosystem service  
734 provision: Challenges and opportunities for soil erosion prevention in Mediterranean silvo-  
735 pastoral systems. *Land Use Policy* 51:54–65.
- 736 70. Maseyk FJ, Mackay AD, Possingham HP, Dominati EJ, Buckley YM (2017) Managing  
737 Natural Capital Stocks for the Provision of Ecosystem Services. *Conservation Letters*  
738 10(2):211–220.
- 739 71. Pang X, Nordström EM, Böttcher H, Trubins R, Mörtberg U (2017) Trade-offs and  
740 synergies among ecosystem services under different forest management scenarios – The  
741 LEcA tool. *Ecosystem Services* 28:67–79.
- 742 72. Braat LC, Groot RS de (2012) The ecosystem services agenda: bridging the worlds of  
743 natural science and economics, conservation and development, and public and private  
744 policy. *Ecosystem Services* 1(1):4–15.
- 745 73. Englund O, Berndes G, Cederberg C (2017) How to analyse ecosystem services in  
746 landscapes—A systematic review. *Ecological Indicators* 73:492–504.
- 747 74. Czucz B, et al. (2018) Where concepts meet the real world: A systematic review of  
748 ecosystem service indicators and their classification using CICES. *Ecosystem Services*  
749 29:145–157.
- 750 75. Chan KMA, et al. (2012) Where are Cultural and Social in Ecosystem Services? A  
751 Framework for Constructive Engagement. *BioScience* 62(8):744–756.

- 752 76. Hernández-Morcillo M, Plieninger T, Bieling C (2013) An empirical review of cultural  
753 ecosystem service indicators. *Ecological Indicators* 29:434–444.
- 754 77. Lyver POB, et al. (2017) An indigenous community-based monitoring system for  
755 assessing forest health in New Zealand. *Biodiversity and Conservation* 26(13):3183–3212.
- 756 78. TEEB (2010) *The Economics of Ecosystems and Biodiversity: Mainstreaming the*  
757 *economics of Nature: A synthesis of the approach, conclusions and recommendations of TEEB.*  
758 (United Nations Environment Programme).
- 759 79. CICES (2018) Common International Classification of Ecosystem Services (CICES) V5.1  
760 (January 2018). Available at: <https://cices.eu/> [Accessed February 2, 2018].
- 761 80. Díaz S, et al. (2018) Assessing nature’s contributions to people. *Science* 359(6373):270–  
762 272.
- 763 81. Dallimer M, et al. (2015) Historical influences on the current provision of multiple  
764 ecosystem services. *Global Environmental Change* 31:307–317.
- 765 82. Perring MP, et al. (2016) Global environmental change effects on ecosystems: The  
766 importance of land-use legacies. *Global Change Biology* 22(4):1361–1371.

## 767 **Figure legends**

768 **Fig. 1.** Hierarchical clustering of land covers. Land covers exhibiting a greater similarity in  
769 their provision of 8 ecosystem services are clustered closer to each other than covers with  
770 contrasting trends in service provision. Likewise, distances along the height axis indicate  
771 dissimilarity among clusters of land covers, with clusters that merge at a greater height  
772 exhibiting greater dissimilarity in service provision.

773 **Fig. 2.** Hierarchical clustering of ecosystem services. Ecosystem services that cluster  
774 together tend to be provided similarly across eight land covers. A greater separation  
775 between the branching points for clusters along the height axis indicates greater  
776 dissimilarity among clusters in the extent to which they deliver each of the services  
777 included in the analysis.

778 **Fig. 3.** Example visualizations for exploring land use trade-offs in the provision of multiple  
779 ecosystem services from entire landscapes. Quantitative measures of the provision of  
780 multiple ecosystem services by different land uses or land covers (such as those obtained  
781 from our meta-analysis) can be used to generate ordinations that ‘map’ land covers or land  
782 uses into the multidimensional space of ecosystem service provision (ordination graphs).  
783 Distribution of land covers (or uses) within that space can assist with identification of  
784 redundancies in service provision (among land covers/uses that map close together) and  
785 trade-offs among land covers/uses that provide contrasting sets of services and,  
786 consequently, occupy opposite extremes of the ordination space. Furthermore, the  
787 hypervolume enclosed by the total set of land covers/uses from a given landscape  
788 expresses the diversity of services provided by that landscape. As an example, our data can  
789 be used to compare multi-service provision for: a landscape with few, undifferentiated  
790 production land covers (Case 1); a landscape with a combination of some production and  
791 non-production land covers (Case 2) and a landscape with a broad range of production and  
792 non-production land covers that provide a diverse range of services (Case 3). In each case,  
793 the size of the points is proportional to the areal extent of the land cover.



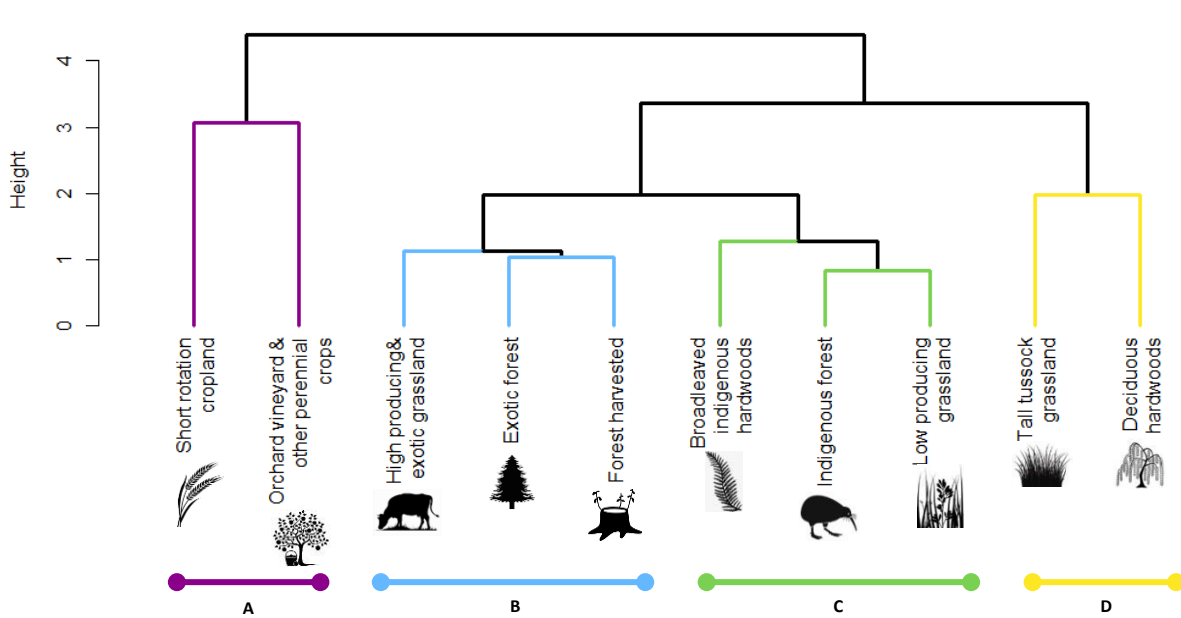

**Fig. 1.** Hierarchical clustering of land covers. Land covers exhibiting a greater similarity in their provision of 8 ecosystem services are clustered closer to each other than covers with contrasting trends in service provision. Likewise, distances along the height axis indicate dissimilarity among clusters of land covers, with clusters that merge at a greater height exhibiting greater dissimilarity in service provision.

1  
2  
3  
4  
5  
6  
7  
8  
9  
10  
11  
12  
13

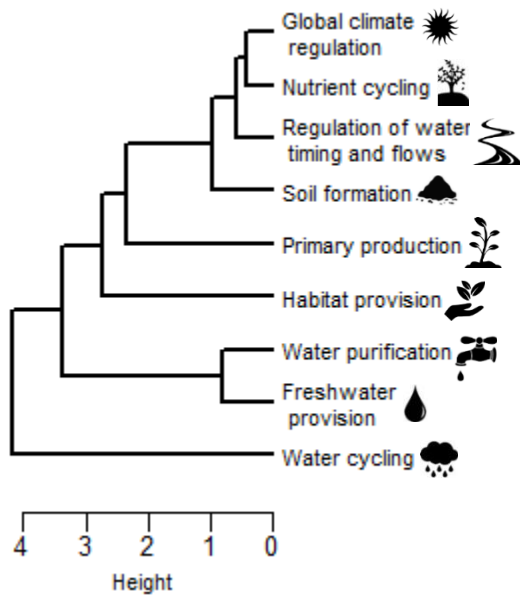

14 **Fig. 2.** Hierarchical clustering of ecosystem services. Ecosystem services that cluster together tend to be provided  
15 similarly across eight land covers. A greater separation between the branching points for clusters along the height  
16 axis indicates greater dissimilarity among clusters.

### Case 1

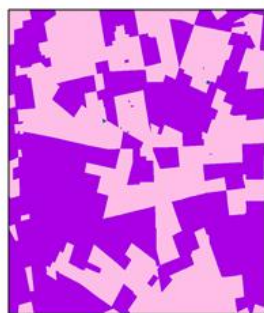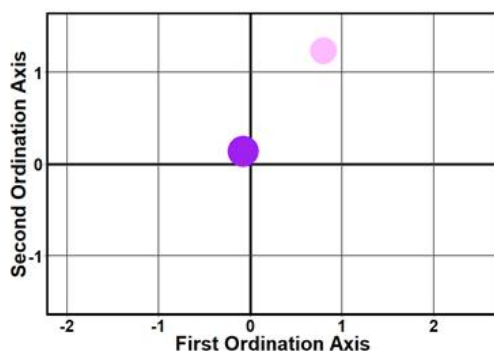

### Case 2

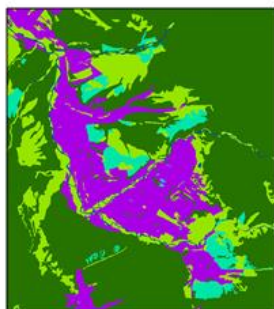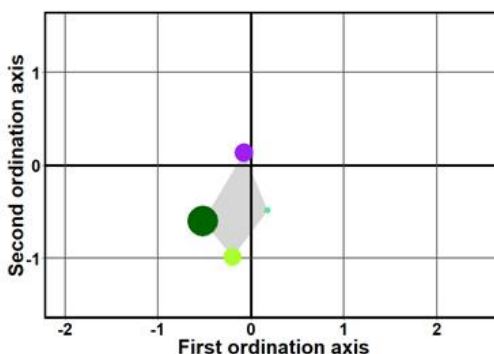

#### Land covers

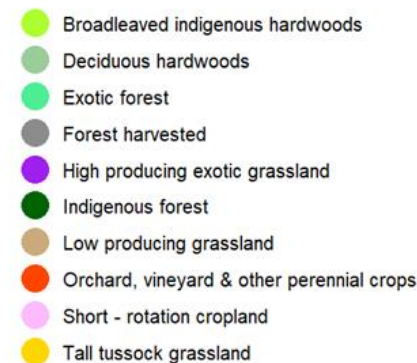

### Case 3

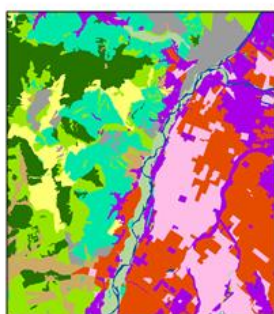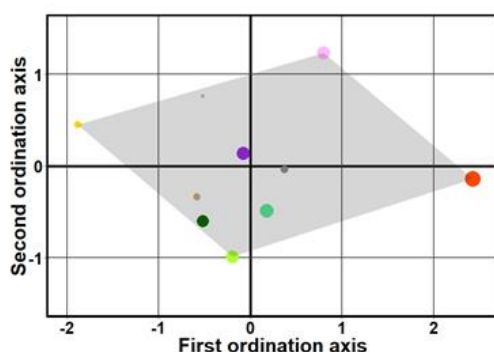

1 **Fig. 3.** Example visualizations for exploring land use trade-offs in the provision of multiple ecosystem services from  
2 entire landscapes. Quantitative measures of the provision of multiple ecosystem services by different land uses or  
3 land covers (such as those obtained from our meta-analysis) can be used to generate ordinations that 'map' land  
4 covers or land uses into the multidimensional space of ecosystem service provision (ordination graphs).  
5 Distribution of land covers (or uses) within that space can assist with identification of redundancies in service  
6 provision (among land covers/uses that map close together) and trade-offs among land covers/uses that provide  
7 contrasting sets of services and, consequently, occupy opposite extremes of the ordination space. Furthermore, the  
8 hypervolume enclosed by the total set of land covers/uses from a given landscape expresses the diversity of services  
9 provided by that landscape. As an example, our data can be used to compare multi-service provision for: a  
10 landscape with few, undifferentiated production land covers (Case 1); a landscape with a combination of some  
11 production and non-production land covers (Case 2) and a landscape with a broad range of production and non-  
12 production land covers that provide a diverse range of services (Case 3). In each case, the size of the points is  
13 proportional to the areal extent of the land cover.

1 **Supplementary Information for: Meta-analysis reveals that the provision of**  
2 **multiple ecosystem services requires a diversity of land covers**

3 **Carla Gómez-Creutzberg<sup>a,1</sup>, Malgorzata Lagisz<sup>b</sup>, Shinichi Nakagawa<sup>b</sup>, Eckehard G.**  
4 **Brockerhoff<sup>c,d</sup> and Jason M. Tylianakis<sup>a,e,1</sup>**

5 <sup>a</sup> Centre for Integrative Ecology, University of Canterbury, Christchurch 8140, New Zealand;

6 <sup>b</sup> Evolution & Ecology Research Centre, School of Biological, Earth and Environmental  
7 Sciences, University of New South Wales, Sydney, NSW, 2052, Australia; <sup>c</sup> Scion (New  
8 Zealand Forest Research Institute), Christchurch 8440, New Zealand; <sup>d</sup> Swiss Federal  
9 Research Institute WSL, Zürcherstrasse 111, CH-8903 Birmensdorf, Switzerland (Present  
10 address); <sup>e</sup> Department of Life Sciences, Imperial College London, Silwood Park Campus,  
11 Ascot, Berkshire SL5 7PY, United Kingdom.

12 <sup>1</sup> To whom correspondence may be addressed. Email: [cgomezcre@gmail.com](mailto:cgomezcre@gmail.com) or  
13 [jason.tylianakis@canterbury.ac.nz](mailto:jason.tylianakis@canterbury.ac.nz)

14 **This PDF file includes:** SI Appendices 1 to 11

15 **Other supplementary materials for this manuscript include** SI Datasets 1 to 2

16 **Appendix 1. Definitions**

17 **Table S1.** Overview of Ecosystem services

| Category     | Ecosystem Service        | Description                                                        |
|--------------|--------------------------|--------------------------------------------------------------------|
| Provisioning | Food - crops             | Cultivated plants for use by people or animals.                    |
|              | Food - milk              | Animals raised for domestic or commercial consumption or use.      |
|              | Food - meat              | Animals raised for domestic or commercial consumption or use.      |
|              | Food - capture fisheries | Wild fish captured through trawling and other non-farming methods. |

| Category   | Ecosystem Service                                   | Description                                                                                                                                                                          |
|------------|-----------------------------------------------------|--------------------------------------------------------------------------------------------------------------------------------------------------------------------------------------|
|            | Food - aquaculture                                  | Fish, shellfish, and/or plants that are bred and reared in ponds, enclosures.                                                                                                        |
|            | Food - wild plant and animal products               | Plant and animal food sources gathered or caught in the wild.                                                                                                                        |
|            | Fiber - timber and wood                             | Products made from trees harvested from forest ecosystems, plantations, or non-forested lands.                                                                                       |
|            | Fiber - other Fibers                                | Non-wood and non-fuel based fibers sourced from the environment.                                                                                                                     |
|            | Biomass fuel                                        | Sources of fuel derived from plants and animals (wood, biofuel production, dung).                                                                                                    |
|            | Genetic resources                                   | Genes and genetic information used for animal breeding, plant improvement, and biotechnology (MEA, 2005).                                                                            |
|            | Biochemicals, natural medicines and pharmaceuticals | Medicines, biocides, food additives, and other biological materials derived from ecosystems for commercial or domestic use.                                                          |
|            | Ornamental resources                                | Products from nature that serve aesthetic purposes.                                                                                                                                  |
|            | Freshwater                                          | Inland bodies of freshwater, groundwater, rainwater, and surface waters for household, industrial, and agricultural uses.                                                            |
| Regulating | Maintenance of air quality                          | Influence ecosystems have on air quality by either emitting chemicals to the atmosphere (reducing air quality) or extracting chemicals from the atmosphere (increasing air quality). |
|            | Global climate regulation                           | Influence ecosystems have on the global climate by emitting greenhouse gases or aerosols to the                                                                                      |

| Category | Ecosystem Service                     | Description                                                                                                                                                                                 |
|----------|---------------------------------------|---------------------------------------------------------------------------------------------------------------------------------------------------------------------------------------------|
|          |                                       | atmosphere, or by absorbing greenhouse gases or aerosols from the atmosphere.                                                                                                               |
|          | Regional and local climate regulation | Influence ecosystems have on local and regional climatic systems (expressed in local temperatures, rains, winter, frost frequency and other climatic factors).                              |
|          | Regulation of water timing and flows  | Influence ecosystems have on the timing and magnitude of water runoff, flooding, and aquifer recharge (particularly in terms of the water storage potential of the ecosystem or landscape). |
|          | Erosion control                       | Role plants play in soil retention and the prevention of landslides.                                                                                                                        |
|          | Water purification                    | Role ecosystems play in filtering nutrients, heavy metals and pollutants in water.                                                                                                          |
|          | Waste treatment                       | Role ecosystems play in decomposing organic wastes and recycling them; taking up and detoxifying compounds through soil and subsoil processes.                                              |
|          | Disease mitigation                    | Influence that ecosystems have on the incidence and abundance of human pathogens. Bio-control agents and pathogens limit the need for chemical interventions.                               |
|          | Pest regulation                       | Influence ecosystems have on the amount of crop and livestock pests and diseases. Bio-control agents and pathogens limit the need for chemical interventions.                               |
|          | Pollination                           | Role ecosystems play in transferring pollen between male and female plants.                                                                                                                 |

| Category   | Ecosystem Service                    | Description                                                                                                                                                                                      |
|------------|--------------------------------------|--------------------------------------------------------------------------------------------------------------------------------------------------------------------------------------------------|
|            | Natural hazard regulation            | Degree to which ecosystems reduce damage caused by natural hazards.                                                                                                                              |
| Cultural   | Ethical and spiritual values         | Spiritual, religious, aesthetic, intrinsic or other values people attach to ecosystems, landscapes or species.                                                                                   |
|            | Educational and inspirational values | Information people get from ecosystems that is used for intellectual development, culture, art, design and innovation.                                                                           |
|            | Recreation and ecotourism            | Recreation undertaken in nature, including tourism sector business and tourist activities that rely on natural or managed ecosystems.                                                            |
| Supporting | Habitat provision                    | Natural or semi-natural environments that provide all the necessary elements for the survival and reproduction of animal and plant populations and their capacity to recover after disturbances. |
|            | Nutrient cycling                     | Cycling of essential nutrients for life (20 in total, includes nitrogen and phosphorous) (MEA, 2005).                                                                                            |
|            | Soil formation                       | Rate of soil formation (MEA, 2005).                                                                                                                                                              |
|            | Primary production                   | As a measure of the assimilation or accumulation of energy and nutrients by organisms (MEA, 2005).                                                                                               |
|            | Water cycling                        | Different from freshwater provision in that it involves the cycling of water through ecosystems as a benefit for living organisms (MEA, 2005).                                                   |

18

19 **Table S2.** Overview of land cover classes as defined by Thompson et al. (2003) for New  
 20 Zealand's Land Cover Database – LCDB.



| Group                              | Class                         | Description                                                                                                                                                                                                                                                                  |
|------------------------------------|-------------------------------|------------------------------------------------------------------------------------------------------------------------------------------------------------------------------------------------------------------------------------------------------------------------------|
| Artificial surfaces                | Built-up area (settlement)    | Central business districts, suburban dwellings, commercial and industrial areas, horticultural sites dominated by structures and sealed surfaces. Includes associated hard surfaces and infrastructures (e.g., roads, carparks, paved areas), low density residential areas. |
|                                    | Urban parkland/<br>Open space | Open, typically mown, within or associated with built-up areas. Includes parks (with scattered trees), playing fields, cemeteries, airports, golf courses, river berms). Hard surfaces, trees or scrub exceeding one hectare are classified separately.                      |
|                                    | Surface mine & dump           | Gravel pits and other open quarries or disposal areas for solid waste material.                                                                                                                                                                                              |
|                                    | Transport infrastructure      | Roads, railroads, airport runways, skid sites from forest logging that are discernible in the satellite imagery used for the classification (generally should exceed one hectare).                                                                                           |
| Bare or lightly vegetated surfaces | Sand, gravel and rock         | Coastal strip, landward side of the coastline.                                                                                                                                                                                                                               |
|                                    | Gravel and rock               | Areas of gravel, sand and rock areas adjacent to rivers, streams and lakes. Also includes: bare ground associated with thermal activity; scree slopes, glacial debris, rock tor areas in hills and high lands and recently formed surfaces with little or no biomass.        |
|                                    | Landslide                     | Subsoil and parent material exposed due to localized erosion.                                                                                                                                                                                                                |

| Group        | Class                                     | Description                                                                                                                                                                                                                                       |
|--------------|-------------------------------------------|---------------------------------------------------------------------------------------------------------------------------------------------------------------------------------------------------------------------------------------------------|
|              | Permanent snow and ice                    | Areas greater than one hectare with perennial cover of snow and ice, includes glacier areas.                                                                                                                                                      |
|              | Alpine grass / herbfield                  | Vegetation areas above the tree line, dominated by low growing and mat forming herbs and grasses. High bare ground components. Sites don't have a history of pastoral use.                                                                        |
| Water bodies | Lake or pond                              | Permanently or intermittently standing open fresh water without emerging vegetation. Water bodies can be natural or artificial (oxidation ponds, fire control ponds and reservoirs).                                                              |
|              | River                                     | Flowing open freshwater without emerging vegetation. Includes natural and modified systems with a width greater than 30 meters.                                                                                                                   |
|              | Estuarine open water                      | Standing or flowing open water areas without emerging vegetation and in which saline waters are occasionally or periodically diluted by freshwater (or freshwater is made saline). Includes estuaries of rivers, lagoons and dune swales.         |
| Cropland     | Short - rotation cropland                 | Areas where soil is exposed to cultivation regularly or at least annually. Includes land for growing cereal crops, root crops, annual seed crops, annual vegetable crops, hops, strawberry fields, annual flower crops and open ground nurseries. |
|              | Orchard, vineyard & other perennial crops | Orchards and areas cultivated less than annually used for producing tree crops as well as crops grown on shrubs or climbing plants. Includes areas with perennial vines supporting grape crops.                                                   |
| Grassland,   | High producing                            | Exotic grasslands with vigorous vegetation cover                                                                                                                                                                                                  |

| Group                   | Class                   | Description                                                                                                                                                                                                                                                                                                                                                                                                                                                                                                                                                                                                      |
|-------------------------|-------------------------|------------------------------------------------------------------------------------------------------------------------------------------------------------------------------------------------------------------------------------------------------------------------------------------------------------------------------------------------------------------------------------------------------------------------------------------------------------------------------------------------------------------------------------------------------------------------------------------------------------------|
| Sedgeland,<br>Saltmarsh | exotic grassland        | (clovers - <i>Trifolium</i> spp., ryegrass - <i>Lolium perenne</i> , cocksfoot - <i>Dactylis glomerata</i> ). Usually comprises intensively managed grasslands, rotationally grazed for wool, lamb, beef, dairy and deer production. Management involves pasture renewal every five to ten years, application of fertilizers and in some cases irrigation. Class also includes extensively managed grasslands with low-producing grasses (browntop - <i>Agrostis capillaris</i> and sweet vernal - <i>Anthoxanthum odoratum</i> ) that happen to show lush growth due to high soil fertility or annual rainfall. |
|                         | Low producing grassland | Exotic and indigenous grasslands with low plant vigor (seasonally varying) and biomass (which may be due to environmental conditions or management practices). Dominant species include less productive exotic grasses (browntop - <i>Agrostis capillaris</i> and sweet vernal - <i>Anthoxanthum odoratum</i> ) usually mixed with short tussock species. Also includes areas of short tussock grassland hard tussock ( <i>Festuca novaezelandiae</i> ), blue tussock ( <i>Poa colensoi</i> ), and / or silver tussock ( <i>Poa cita</i> ).                                                                      |
|                         | Tall tussock grassland  | Highland areas that have not been under intensive farm management and with the presence of <i>Chionochloa</i> spp. (usually accompanied by short tussock and herbs - particularly <i>Celmisia</i> spp.). Can support extensive summer grazing which usually accounts for the presence of exotic grasses.                                                                                                                                                                                                                                                                                                         |
|                         | Depleted                | Grassland/herbfield areas with very low herbaceous                                                                                                                                                                                                                                                                                                                                                                                                                                                                                                                                                               |

| Group                  | Class                            | Description                                                                                                                                                                                                                                                                                                                                   |
|------------------------|----------------------------------|-----------------------------------------------------------------------------------------------------------------------------------------------------------------------------------------------------------------------------------------------------------------------------------------------------------------------------------------------|
|                        | grassland                        | vegetation cover. Short tussock grassland species are present but have less than 10% cover. <i>Hieracium</i> spp. and/or exotic grassland species are conspicuous as is the bare ground. Low plant vigor is due to soil nutrient loss from repeated burning and overgrazing.                                                                  |
|                        | Herbaceous freshwater vegetation | Permanent or periodical freshwater wetland areas with emergent herbaceous aquatic vegetation dominated by sedges ( <i>Cyperaceae</i> ), rushes ( <i>Juncaceae</i> ) or tall erect herbs ( <i>Poaceae</i> , <i>Restionaceae</i> , <i>Typhaceae</i> ). Includes areas with low growing dicotyledon herbs and with <i>Sphagnum</i> moss.         |
|                        | Herbaceous saline vegetation     | Estuarine or coastal wetland areas (with saline/brackish water or saltwater saturated soils) dominated by herbaceous aquatic vegetation. Dominance of salt-tolerant plants ( <i>Schoenoplectus</i> spp., <i>Apodasmia similis</i> , or glasswort - <i>Sarcocornia quinqueflora</i> ). Most areas are subject to tidal changes in water level. |
|                        | Flaxland                         | Areas dominated by lowland flax ( <i>Phormium tenax</i> ), usually moist and as part of wetland systems .                                                                                                                                                                                                                                     |
| Scrub and/or Shrubland | Fernland                         | Areas where bracken fern ( <i>Pteridium esculentum</i> ), umbrella fern ( <i>Gleichenia</i> spp.), and ring fern ( <i>Paesia scaberula</i> ) dominate. It represents a successional vegetation type in previously forested land and encompasses sites with low fertility and which have been recently burnt.                                  |
|                        | Gorse and/or broom               | Disturbed areas where low fertility, extensive grazing and fire have facilitated the spread and establishment                                                                                                                                                                                                                                 |

| Group | Class                            | Description                                                                                                                                                                                                                                                                                                                                                                                                                                                                                                                                                                                                                                                               |
|-------|----------------------------------|---------------------------------------------------------------------------------------------------------------------------------------------------------------------------------------------------------------------------------------------------------------------------------------------------------------------------------------------------------------------------------------------------------------------------------------------------------------------------------------------------------------------------------------------------------------------------------------------------------------------------------------------------------------------------|
|       | Manuka and/or kanuka             | <p>of gorse and/or broom.</p> <p>Indigenous shrubland, usually found as an early successional scrub type on previously forested land. Fires are used to maintain area in scrub stage and prevent and prevent succession into mature stands and forest. Both manuka and kanuka can occur but the former is more common in the South Island and the latter in the North Island.</p>                                                                                                                                                                                                                                                                                         |
|       | Matagouri or grey scrub          | <p>Matagouri (<i>Discaria toumatou</i>) is a thorny divaricate shrub found in open shrubland or thickets among montane areas of the South Island. It is usually associated with freely drained recent soils (river terraces, outwash fans) and can occur in areas under extensive farm management as a response to practices such as phosphate application. Grey scrub areas are dominated with small-leaved indigenous shrubs with divaricate growth (entangled fine branches at almost right angles to each other), and native climbers (e.g., <i>Muehlenbeckia</i> and <i>Parsonsia</i>), however, the dominant feature is the woody component (hence grey scrub).</p> |
|       | Broadleaved indigenous hardwoods | <p>Areas usually in an advanced successional stage back to indigenous forest. Vegetation cover involves a mix of broad-leaved, usually seral (successional) broadleaved species (wineberry - <i>Aristotelia serrata</i>, mahoe - <i>Melicytus ramiflorus</i>, <i>Pseudopanax</i> spp., <i>Pittosporum</i> spp., <i>Fuchsia</i> spp., ngaio - <i>Myoporum laetum</i>, and titoki - <i>Alectryon excelsus</i>), tutu (<i>Coriaria</i> spp.) and tree ferns. Usually found in areas with high rainfall. Class also</p>                                                                                                                                                       |

| Group  | Class                  | Description                                                                                                                                                                                                                                                                                                                                                                                                                                                                                                     |
|--------|------------------------|-----------------------------------------------------------------------------------------------------------------------------------------------------------------------------------------------------------------------------------------------------------------------------------------------------------------------------------------------------------------------------------------------------------------------------------------------------------------------------------------------------------------|
|        | Sub-alpine Shrubland   | includes low-growing coastal broadleaved forest.<br>Diverse range of communities occurring in the 900 - 1200 m.a.s.l range between indigenous forest and tall tussock grassland, alpine grass/herbfields and alpine gravel and rock. Can also be found at lower altitudes as secondary vegetation after forest clearance. Community composition and height strongly influenced by rainfall and exposure. Class includes frost flats (old tephra plains - plains formed by alluvial deposition of pumice stone). |
|        | Mixed exotic shrubland | Single-species or mixed communities of introduced shrubs and climbers boxthorn, hawthorn ( <i>Crataegus</i> spp.), elderberry ( <i>Sambucus</i> spp.), brier ( <i>Rosa rubiginosa</i> ), buddleja ( <i>Buddleja davidii</i> ), blackberry ( <i>Rubus</i> spp.), and old man's beard ( <i>Clematis vitalba</i> ). Includes areas of amenity planting where shrublands are larger than one hectare.                                                                                                               |
| Forest | Exotic forest          | Areas with <i>Pinus radiata</i> as well as exotic forests of conifers (douglas fir, Monterey cypress, larch) and broadleaved species ( <i>Acacia</i> , <i>Eucalyptus</i> ). Includes wilding pines (i.e. those that are growing spontaneously outside of plantations), when identifiable in the imagery. Also includes linear features of evergreen or deciduous trees extending for more than 150 meters.                                                                                                      |
|        | Forest - harvested     | Areas with evidence of harvesting since the previous LCDB survey. Includes canopy openings, skidder tracks, new roads, log landings. It is assumed that these sites will become replanted if they are occurring inside                                                                                                                                                                                                                                                                                          |

| Group | Class                          | Description                                                                                                                                                                                                                                                                                                                                                                                                                                                                                            |
|-------|--------------------------------|--------------------------------------------------------------------------------------------------------------------------------------------------------------------------------------------------------------------------------------------------------------------------------------------------------------------------------------------------------------------------------------------------------------------------------------------------------------------------------------------------------|
|       |                                | <p>plantations, they are therefore marked as plantations and checked in the next LCDB survey iteration (which should occur every 5 years) by then the forest should be identifiable. Cleared areas of native forest are also assigned to this class unless the loss is due to localized erosion (in which case they are classified as landslides). This class is used to check the extent of harvested forest that is replanted and the indigenous forest that is converted to another land cover.</p> |
|       | <p>Deciduous<br/>hardwoods</p> | <p>Willows and poplar species growing adjacent to inland water and rivers as well as planted deciduous hardwoods (oak - <i>Quercus</i> spp., ash - <i>Fraxinus excelsior</i> and elm - <i>Ulmus</i> spp.).</p>                                                                                                                                                                                                                                                                                         |
|       | <p>Indigenous forest</p>       | <p>Forest dominated by indigenous tall forest canopy species.</p>                                                                                                                                                                                                                                                                                                                                                                                                                                      |
|       | <p>Mangrove</p>                | <p><i>Avicenna officinalis</i> communities occurring in estuarine mudflats and tidal creeks. Distribution is confined to North Island (up to 38 degrees South).</p>                                                                                                                                                                                                                                                                                                                                    |

21

22



## 23 **Appendix 2. Detailed data collection and processing methods**

### 24 **Literature search**

25 To assess the viability of our project, an initial scoping search was conducted using Google  
26 Scholar and some general terms to capture our review subject (essentially, “New Zealand”,  
27 “land use” or variations of this, and keywords on some of the ecosystem services, see SI  
28 Appendix 3). After manually screening the results of the scoping search, 201 potentially  
29 relevant documents were identified, suggesting that the project would not be limited by  
30 insufficient evidence/data.

31 The multidisciplinary database Scopus was then selected for our formal search since it  
32 provided uniform access (i.e. independent of institutional subscription categories) to a  
33 comprehensive collection of abstracts and citations from international, peer-reviewed  
34 journals and serial books. We searched for titles, abstracts and keywords that contained at  
35 least one match in each of the 3 components that structured our search: 1) “New Zealand”,  
36 2) land cover and land use terms, and 3) ecosystem service terms (see SI Appendix 3 for  
37 the full search phrase). Land cover terms included all possible variations of “land use” and  
38 “land cover” as well as terms on specific land covers (both generic and specific to New  
39 Zealand. The ecosystem services component drew upon the names of each service (and  
40 possible variations of these) but also included vocabulary describing processes and  
41 conditions that could reflect their provision at the site scale akin to an individual land cover  
42 unit. To distill the final set of land-use and ecosystem service terms, 69 trial searches were  
43 conducted. This ensured that the final phrase, with approximately 840 terms, was  
44 sufficiently comprehensive. The search was finalized in December 2014, and was  
45 constrained to include documents published from 1970 onward, to be comparable with  
46 current land use regimes in New Zealand (1).

### 47 **Document screening and assessment**

48 In total, 9,741 citations matched our search criteria. The titles, abstracts and keywords of  
49 these citations were subjected to an automatic screening that removed any duplicates and  
50 selected only those that mentioned at least two different land cover terms. We conducted

51 the latter step because our search returned studies with at least one land cover term  
52 whereas we required studies that compared two or more land covers. The abstracts of the  
53 4,373 citations marked as relevant after this screening were then scanned to check  
54 whether they pertained to research that could potentially allow for the quantitative  
55 comparison of two or more different terrestrial land covers, in New Zealand, for the  
56 provision of any of the 35 ecosystem services we defined for the project.

57 Abstracts were screened using an interactive machine learning system for semi-automated  
58 abstract screening, Abstrackr, which is often used in medical meta-analyses (2). By using an  
59 active learning approach and a dual supervision classification algorithm, Abstrackr draws  
60 from the selection decisions and relevant/irrelevant words reviewers find in a sample of  
61 their abstracts to estimate the likelihood of the unscreened abstracts being relevant. The  
62 screening order of the remaining abstracts is subsequently prioritized according to this  
63 likelihood. Abstracts in our study were screened by two reviewers who, after checking for  
64 agreement in their decisions for a common pilot set of 500 abstracts, independently  
65 reviewed the remaining abstracts until a stopping point of 50 consecutive non-relevant  
66 citations was reached. This stopping point was reached after 2,957 abstracts were  
67 screened, leaving 1,416 unscreened ones, which the machine-learning algorithm deemed to  
68 be less relevant than the 50 that comprised our stopping point.

69 The abstract screening and the initial pilot search yielded 914 relevant abstracts, which  
70 were passed on to a team of 4 reviewers for full-text assessment and data extraction. The  
71 full-text assessment included the following inclusion criteria:

- 72 1. Selected studies had to present quantitative data derived from original research  
73 conducted in 1970 or later, and which did not duplicate data that had been published  
74 in other studies already in our analysis.
- 75 2. Only quantitative measures that could be taken as indicators of the provision of one  
76 (or more) ecosystem services (according to the service definitions in SI Appendix 1)  
77 were extracted from each study.

78 3. The data for each land cover had to come from at least two replicate observations. For  
79 any given study, a replicate observation was defined as one taken from a land cover  
80 unit that could be identified as a distinct spatial feature and which had sufficient  
81 separation from other units of the same land cover included in the same study so as to  
82 ascertain spatial independence of the observations. For the cases where the spatial  
83 separation of two units of the same land cover could not be readily ascertained, we  
84 applied a distance criterion. Instead of defining a fixed minimum distance between  
85 replicate land cover units (which could vary depending on the scale of a service), we  
86 defined as separate replicates any two units of the same land cover that were  
87 separated such that the distance between them was larger than the distance between  
88 any of them and any neighboring units of a different land cover.

89 Given the diversity of ecosystem services in our review, the documents we assessed  
90 comprised a very heterogeneous set of sampling and experimental designs, which meant  
91 that a land cover unit could range in size from whole forests and catchments to forest  
92 fragments, fields and crop plots; all of which were included as long as we could verify that  
93 the unit was spatially independent from other units of the same land cover and dominated  
94 in at least 80% by the same land cover type. Studies that did not have replicated  
95 observations (as defined above) for any land covers were discarded whereas studies that  
96 contained replication on some, but not all, of the land covers were kept and only data on  
97 the replicated land covers were extracted. If in the original studies' data were corrected for  
98 the potential effect of confounding covariates (i.e. slope), the corrected values were  
99 extracted instead of the uncorrected ones. Finally, within our review, the units of interest  
100 comprised only terrestrial land covers such that any comparisons between water bodies  
101 and any terrestrial land covers were not extracted. However, information on how different  
102 terrestrial land covers affected ecosystem services linked to a water body was included in  
103 our analysis. Full details of how the full-text selection criteria were applied can be found in  
104 SI Appendix 4.

105 Weekly meetings of the reviewers were held throughout the assessment and data  
106 extraction processes to ensure consistent implementation of these criteria. Authors were  
107 contacted whenever the data presented in a study were not readily extractable (due to

108 legibility or formatting issues) or when further clarification was needed on the types of  
109 land covers involved in the study or the methods used to sample them. Authors of 96  
110 studies were contacted with a 50% success response rate. In total, data from 260 studies  
111 were extracted.

## 112 **Data aggregation and calculation of effect sizes**

113 Extracted data from all studies were recorded in a database. As described in the main text,  
114 we assigned the quantitative measures of ecosystem service provision (indicators)  
115 reported by each study to one or more ecosystem services (SI Dataset 1) and defined  
116 whether service provision would generally increase or decrease with larger values of the  
117 indicator. Thematic experts (see Acknowledgements) were consulted when there was  
118 uncertainty in the allocation of an indicator to a service or the direction of the relation  
119 between both.

120 Our database included some cases where either a single document contained the results of  
121 multiple experiments (each with a unique method or indicator) or, conversely, different  
122 results of a single experiment were published in separate documents. The latter case  
123 included studies with partial duplication of the results in different publications and a case  
124 where the results for different land covers for the same experiment were published in  
125 separate documents. To bring these studies into comparable terms with those that had the  
126 results of experiments published in only one article, we generated new unique study  
127 identifiers such that, for all effects in our review, these cases would either be treated as  
128 separate studies (i.e. when a single publication presented the outcomes of multiple,  
129 separate experiments) or merged into a single study (i.e. where the outcomes of a single  
130 experiment was published in multiple studies with no or partial overlap). For cases where  
131 two or more publications contained duplicated results from a single experiment, only data  
132 from the publication with the most comprehensive set of results was kept in our dataset.

133 In addition, several studies in our database contained multiple or repeated measures of the  
134 same indicator within a single land cover replicate. To allow for a standardized comparison  
135 across all studies, these were summarized to a single value per land cover replicate. In  
136 cases where the multiple measures were taken at different soil or water depths, the

137 measurement of the topmost layer that occurred across all the land covers in the study was  
138 taken as the summarized value. For all other cases, repeated or multiple measures were  
139 summarized into a single mean value of the service indicator per replicate. This is  
140 equivalent to aggregating data to one response value per individual patient in medical  
141 meta-analyses. Studies that did not provide enough information to allow for the  
142 aggregation of multiple/repeated measurements to the standard replication level had to be  
143 excluded from the analysis.

144 Some studies reported a summary for all replicates of the same land cover, for the  
145 remaining studies, the mean and variance across replicates of the same land cover (and  
146 ecosystem service indicator) was calculated. For studies where data were already  
147 summarized across land cover replicates, but were presented as medians with either  
148 absolute and/or interquartile ranges, conversions to means and variances were made  
149 following the methods defined by (3). Similarly, conversions from standard deviation,  
150 standard error and 95% confidence intervals to variance were also applied for summarized  
151 data that presented these measures of variation (see SI Appendix 6 for the equations to  
152 convert 95% confidence intervals). For studies that reported a mean value for the indicator  
153 per land cover but no measure of variance, Taylor's power law (4) was used to impute  
154 variances with estimates from a linear regression model of all reported means and  
155 variances in our dataset in log-log space (the full regression model can be found in SI  
156 Appendix 6). Imputed variances accounted for 11% of the records in the final dataset found  
157 in SI Dataset 2. Cases where data could not be converted into means with variances across  
158 replicate land covers (including data on only the maximum and minimum values, geometric  
159 means with no variation and medians with standard errors or lacking variation or sample  
160 size) were not included in the dataset.

161 We adopted a log Response Ratio as the standard effect measure for comparing pairs of  
162 land covers within each study. For each pair of land covers (A and B) in a study, this  
163 measure was estimated as  $\ln(A) - \ln(B)$  for the indicators in which larger values  
164 corresponded to an increase in service provision. For the indicators in which larger values  
165 reflected a decrease in service provision (e.g., when the amount of soil eroded was a

166 measure of erosion control) the inverse of the log Response Ratio was used i.e. - (ln(A) -  
167 ln(B)). For all cases the variance of the log Response Ratio was estimated as (5):

168 
$$v_{RR} = \frac{s_A^2}{n_1 \bar{Y}_A^2} + \frac{s_B^2}{n_2 \bar{Y}_B^2}$$

169 Where  $v_{RR}$  is the variance for the log Response Ratio,  $\bar{Y}$  denotes the mean value of the  
170 ecosystem service indicator for land covers A and B, with variance  $s$  and sampling size  $n$ .  
171 For cases where both land covers had negative numbers in the indicator, we based the ratio  
172 and variance calculations on the absolute indicator values and took the inverse of the ratio  
173 calculated with absolute values as the final value. Similarly, in cases where at least one of  
174 the land covers had a value of zero for the ecosystem service indicator, we added a small  
175 value (3 orders of magnitude smaller than the smallest value in the dataset) to the zero to  
176 allow for the ratio and variance calculations.

177 Studies that presented multiple indicators for a single ecosystem service from each site  
178 (e.g., measures of the cycling rates of various different nutrients), or which presented data  
179 on the same indicator expressed in two different units, required further aggregation of  
180 their log Response Ratios to avoid giving these studies disproportionate weight in the  
181 analysis. For some studies, not all the indicators of a service (or different units for the same  
182 indicator) had information from all of the land covers for the study. Thus, for each study,  
183 we only aggregated the indicators of the same ecosystem service (or sets of data with  
184 different units on the same indicator) that were measured from all of the land covers  
185 present in the study for that service, and excluded from the analysis any indicators that  
186 were not presented for the full range of land covers. If only a single indicator (or unit)  
187 contained data on all of the land covers then the other indicators of that service were  
188 excluded for that study. If two or more indicators (or units) contained data for the full set of  
189 land covers, then data were aggregated by taking a mean of the log Response Ratios and  
190 corresponding variances across the different indicators for each pairwise combination of  
191 land covers of that service in that study. The final dataset with aggregated log Response  
192 Ratios for each study and ecosystem service can be found in SI Dataset 2.

193 **Appendix 4. Full search phrase for pilot and formal searches**

194 **A. Phrase used in formal search**

195 Database used: Scopus

196 *Please consult <https://dev.elsevier.com/tips/ScopusSearchTips.htm> for an explanation of*  
197 *boolean operators and wildcards used*

198 Search was conducted on the 26th January, 2015.

199 Phrase:

200 TOPIC: ("New Zealand")

201 AND

202 TOPIC: ("land use" OR "land cover" OR habitat OR "vegetation type" OR ecosystem\* OR  
203 forest\* OR plantation OR scrub\* OR shrub\* OR pasture\* OR grass\* OR crop\* OR "tussock  
204 grassland" OR "grey scrub" OR bush OR herbfield OR catchment OR "drainage basin" OR  
205 watershed\* OR wetland\* OR river OR lake OR peatland OR marsh OR bog OR fernland OR  
206 flaxland OR matagouri OR mangrove OR orchard OR estuary OR urban OR mine OR town  
207 OR city OR residential OR park OR garden)

208 AND

209 TOPIC: ("ecosystem service\*" OR "habitat quality" OR "habitat provision" OR "nursery  
210 provision" OR "habitat diversity" OR "habitat complexity" OR "habitat feature" OR "habitat  
211 character\*" OR ((feeding OR resting OR roosting OR nesting OR brood OR foraging OR  
212 mating) NEAR (site\* OR cover)) OR "vegetation cover" OR "food availability" OR nurser\* OR  
213 nitrogen OR phosphorus OR potassium OR calcium OR magnesium OR sulphur OR  
214 nitrification OR "soil organic matter" OR nitrification OR fixation OR "nutrient cycl\*" OR  
215 "chemical cycl\*" OR "decomposition" OR "nutrient uptake" OR "nutrient export" OR detritus  
216 OR bacteria OR microorganism OR "biogeochemical cycl\*" OR microbial OR decomposition  
217 OR "soil formation" OR weathering OR "humification" OR "mineralization" OR pedogen\* OR  
218 "soil quality" OR "soil fertility" OR "soil nutrients" OR "nutrient leaching" OR "microbial  
219 biomass" OR "nutrient storage" OR "soil structure" OR "nutrient assimilation" OR biomass  
220 OR "primary production" OR "primary productivity" OR litter\* accumulation OR  
221 aboveground OR belowground OR NPP OR "carbon allocation" OR "productivity allocation"



222 OR "air quality" OR pollut\* OR "nitrogen oxide\*" OR "sulphur and oxide\*" OR aerosol\* OR  
223 "atmospheric cleansing capacity" OR "tropospheric oxidizing capacity" OR "acid rain" OR  
224 particulate OR "volatile organic compounds" OR "carbon stock" OR "total carbon" OR "total  
225 C" OR "carbon storage" OR emission\* OR "carbon loss" OR ((carbon OR methane OR  
226 "tropospheric ozone" OR aerosol\* OR "greenhouse gas\*" OR "nitrous oxide") SAME  
227 (emission\* OR sink OR sequestration)) OR albedo OR "heat flux" OR evapotranspiration OR  
228 precipitation OR rainfall OR temperature OR wind OR humidity OR "climate regulation" OR  
229 "climatic variability" OR runoff OR interception OR infiltration OR "water flow" OR  
230 discharge OR "water retention" OR "lag time" OR "water storage" OR "aquifer recharge" OR  
231 "stream\*flow" OR "water yield" OR "water balance" OR "base\*flow" OR percolation OR  
232 "flow regime" OR "flow regulation" OR erosion OR gulying OR gully OR "soil cover" OR  
233 "vegetation cover" OR rill OR "soil loss" OR "sediment yield" OR "sediment retention" OR  
234 "soil stability" OR "soil compaction" OR "aquatic or pollution" OR "water quality" OR "water  
235 purification" OR "water filtration" OR "filtration" OR "dissolved organic carbon" OR "heavy  
236 metals" OR "dissolved oxygen" OR "nutrient retention" OR "microbial degradation" OR  
237 "benthic indicators" OR "nutrient removal" OR "maximum daily loads" OR "load" OR (waste  
238 SAME (regulat\* or treat\* or assimilat\* or decompos\* or process\* or degrad\*)) OR pollut\*  
239 OR toxic\* OR contaminant\* OR "detoxification" OR "soil pollut\*" OR "nutrient retention" OR  
240 remineralisation OR "human AND pathogen\*" OR "human AND disease\*" OR "infectious  
241 disease\*" OR (propagation SAME (disease OR vector OR pathogen)) OR "disease vector" OR  
242 "pathogen infect\*" OR "disease risk" OR "disease incidence" OR "ecology of disease" OR  
243 "disease ecology" OR "vector control" OR "invasion resistance" OR "pest control" OR "pest  
244 management" OR biocontrol OR "biological control" OR "biological pest control" OR  
245 "natural pest control" OR weed\* OR "pest predat\*" OR ("natural enemy" SAME  
246 (conservation OR augmentation)) OR "seed set" OR pollinat\* OR "flower visit\*" OR  
247 zoophilus OR ornithophilous OR melittophilous OR entomophilous OR fruit OR "crop  
248 plants" OR "hazard mitigation" OR "disaster reduction" OR "disaster risk reduction" OR  
249 buffer\* OR ((storm OR flood OR drought OR fire OR landslide OR avalanche OR "mass  
250 movement" OR hurricane OR windstorm) SAME (protect\* OR buffer\* OR mitigate\* OR  
251 attenuat\* OR defen\*)) OR "flood storage" OR "storm flow" OR "peak flow" OR "extreme  
252 event\*" OR "storm peak" OR ((timber OR round\*wood OR pulp\*wood OR wood) NEAR

253 (harvest\* OR yield OR extraction OR production)) OR “forest product” OR “Non-timber  
254 forest product” OR “non-wood forest product” OR ((fiber OR leather OR hemp OR hide OR  
255 “merino wool” OR yarn OR “alpaca wool” OR “merino wool” OR “possum wool” OR “possum  
256 fur” OR “harakeke flax” OR “flax fibre” OR wool OR fur) SAME (production OR supply OR  
257 provision OR yield OR extraction)) OR ((“fuel wood” OR “wood fuel” OR firewood) SAME  
258 (production OR extraction)) OR biofuel OR “biomass energy” OR biogas OR biodiesel OR  
259 “woody biomass” OR “cultural identity” OR “maori” OR “livelihood” OR ((sacred OR  
260 spiritual) SAME (site OR landscape OR place OR plant OR animal\* OR ecosystem)) OR  
261 “spiritual inspiration” OR “ritual site” OR “sacred grove” OR “sense of belonging” OR  
262 aesthetics OR “scenic value” OR “environmental attribute\*” OR “site attribute\*” OR  
263 “aesthetic enjoyment” OR “aesthetic preference” OR “environmental aesthetics” OR “scenic  
264 beauty” OR “aesthetic pleasure” OR “environmental perception” OR wilderness OR  
265 “landscape preference\*” OR “visual landscape” OR hedonic OR “cultural importance” OR  
266 “archaeological site\*” OR “historic site” OR “heritage site” OR “ancestral site” OR “cultural  
267 landscape” OR “cultural heritage” OR “cultural site” OR “cultural attribute\*” OR “traditional  
268 landscape” OR landmark\* OR “ritual site” OR “burial site” OR “tribal landmark” OR “natural  
269 heritage place\*” OR “Maori site\*” OR “intellectual development” OR “traditional knowledge  
270 system” OR ethnobotan\* OR ethnobiolog\* OR “maatauranga maori” OR “experimental farm”  
271 OR “educational forest” OR “educational farm” OR “distribution research project” OR  
272 “distribution research locations” OR “distribution research site\*” OR “didactic farm” OR  
273 “didactic forest” OR “educational visit\*” OR “school visit\*” OR “field trip\*” OR “field station”  
274 OR “research site\*” OR “research location\*” OR “research project location\*” OR  
275 inspirational site OR ((movie OR film OR photograph\* OR painting) SAME (setting OR  
276 location)) OR “maori art” OR craft\* OR “inspiration from nature” OR “nature in art” OR  
277 “nature in film” OR “nature in literature” OR biomimicry OR bionics OR biomimet\* OR  
278 recreation OR visit\* OR tourism OR “nature tourism” OR ecotourism OR “adventure  
279 tourism” OR “rural tourism” OR “agri\*tourism” OR “cultural tourism” OR “nature\*based  
280 tourism” OR “nature\*based recreation” OR angling OR hiking OR tramping OR birding OR  
281 hunting OR fishing OR mountaineering OR alpinism OR walking OR kayaking OR rowing OR  
282 surfing OR sailing OR rafting OR canoeing OR skiing OR “snow sport\*” OR “winter sport\*”

283 OR windsurfing OR "kites surfing" OR horse riding" OR caving OR "outdoor sport\*" OR  
284 rappelling OR abseiling)

285 **B. Phrases used in pilot search**

286 Database used: Google Scholar

287 Searches were conducted between February - April , 2014.

- 288 1. "New Zealand" AND "land use" AND diversity
- 289 2. "New Zealand" AND "land use" AND biodiversity
- 290 3. "New Zealand" AND "land use" AND H'
- 291 4. "New Zealand" AND "land use" AND evenness
- 292 5. "New Zealand" AND "land use" AND "species richness"
- 293 6. "New Zealand" AND "land use" AND "species abundance"
- 294 7. "New Zealand" AND "land use" AND insect
- 295 8. "New Zealand" AND "land use" AND arthropod
- 296 9. "New Zealand" AND "land use" AND invertebrate
- 297 10. "New Zealand" AND "land use" AND Collembola
- 298 11. "New Zealand" AND "land use" AND Diptera
- 299 12. "New Zealand" AND "land use" AND beetle
- 300 13. "New Zealand" AND "land use" AND Coleoptera
- 301 14. "New Zealand" AND "land use" AND arachnid
- 302 15. "New Zealand" AND "land use" AND spider
- 303 16. "New Zealand" AND "land use" AND mite
- 304 17. "New Zealand" AND "land use" AND Acari
- 305 18. "New Zealand" AND "land use" AND bird
- 306 19. "New Zealand" AND "land use" AND avifauna
- 307 20. "New Zealand" AND "land use" AND plant
- 308 21. "New Zealand" AND "land use" AND vegetation
- 309 22. "New Zealand" AND "land use" AND aquatic
- 310 23. "New Zealand" AND "land use" AND stream

- 311 24. "New Zealand" AND "land use" AND "water yield"
- 312 25. "New Zealand" AND "land use" AND "water quality"
- 313 26. "New Zealand" AND "land use" AND soil
- 314 27. "New Zealand" AND "land use" AND "microbial biomass"
- 315 28. "New Zealand" AND "land use" AND microbes
- 316 29. "New Zealand" AND "land use" AND biota
- 317 30. "New Zealand" AND "land use" AND fungi
- 318 31. "New Zealand" AND "land use" AND mycorrhiza
- 319 32. "New Zealand" AND "land use" AND nutrient
- 320 33. "New Zealand" AND "land use" AND nitrogen
- 321 34. "New Zealand" AND "land use" AND phosphorus
- 322 35. "New Zealand" AND "land use" AND potassium
- 323 36. "New Zealand" AND "land use" AND carbon
- 324 37. "New Zealand" AND "land use" AND methane
- 325 38. "New Zealand" AND "land use" AND transpiration
- 326 39. "New Zealand" AND "land use" AND evapotranspiration
- 327 40. "New Zealand" AND "land use" AND photosynthesis
- 328 Searches also substituted "land use" with:
- 329 1. "catchment"
- 330 2. "paired catchment"
- 331 3. "vegetation type"
- 332 4. "site" and "comparison"
- 333 5. "forest" and "tussock"
- 334 6. "forest" and native bush"
- 335 7. "forest" and "pasture"
- 336 8. "plantation" and "native"
- 337 9. "plantation" and "pasture"
- 338 10. "plantation" and "tussock"

- 339 11. "native and pasture"
- 340 12. "native and tussock"
- 341 13. "tussock" and "bush"
- 342 14. "tussock" and "pasture"
- 343 15. "paired catchment" and "forest"
- 344 16. "paired catchment" and "tussock"
- 345 17. "paired catchment" and "pasture"
- 346 18. "paired catchment" and "bush"
- 347 19. "paired catchment" and "native"
- 348 20. Pinus
- 349 21. Podocarp
- 350 22. Broadlea\*
- 351 23. Chionochloa
- 352 24. Nothofagus
- 353 25. Pasture
- 354 26. Hieracium
- 355 27. Scrub
- 356 28. Shrubland
- 357 29. "Grey shrub"

Appendix 4. Decision tree for full-text assessment

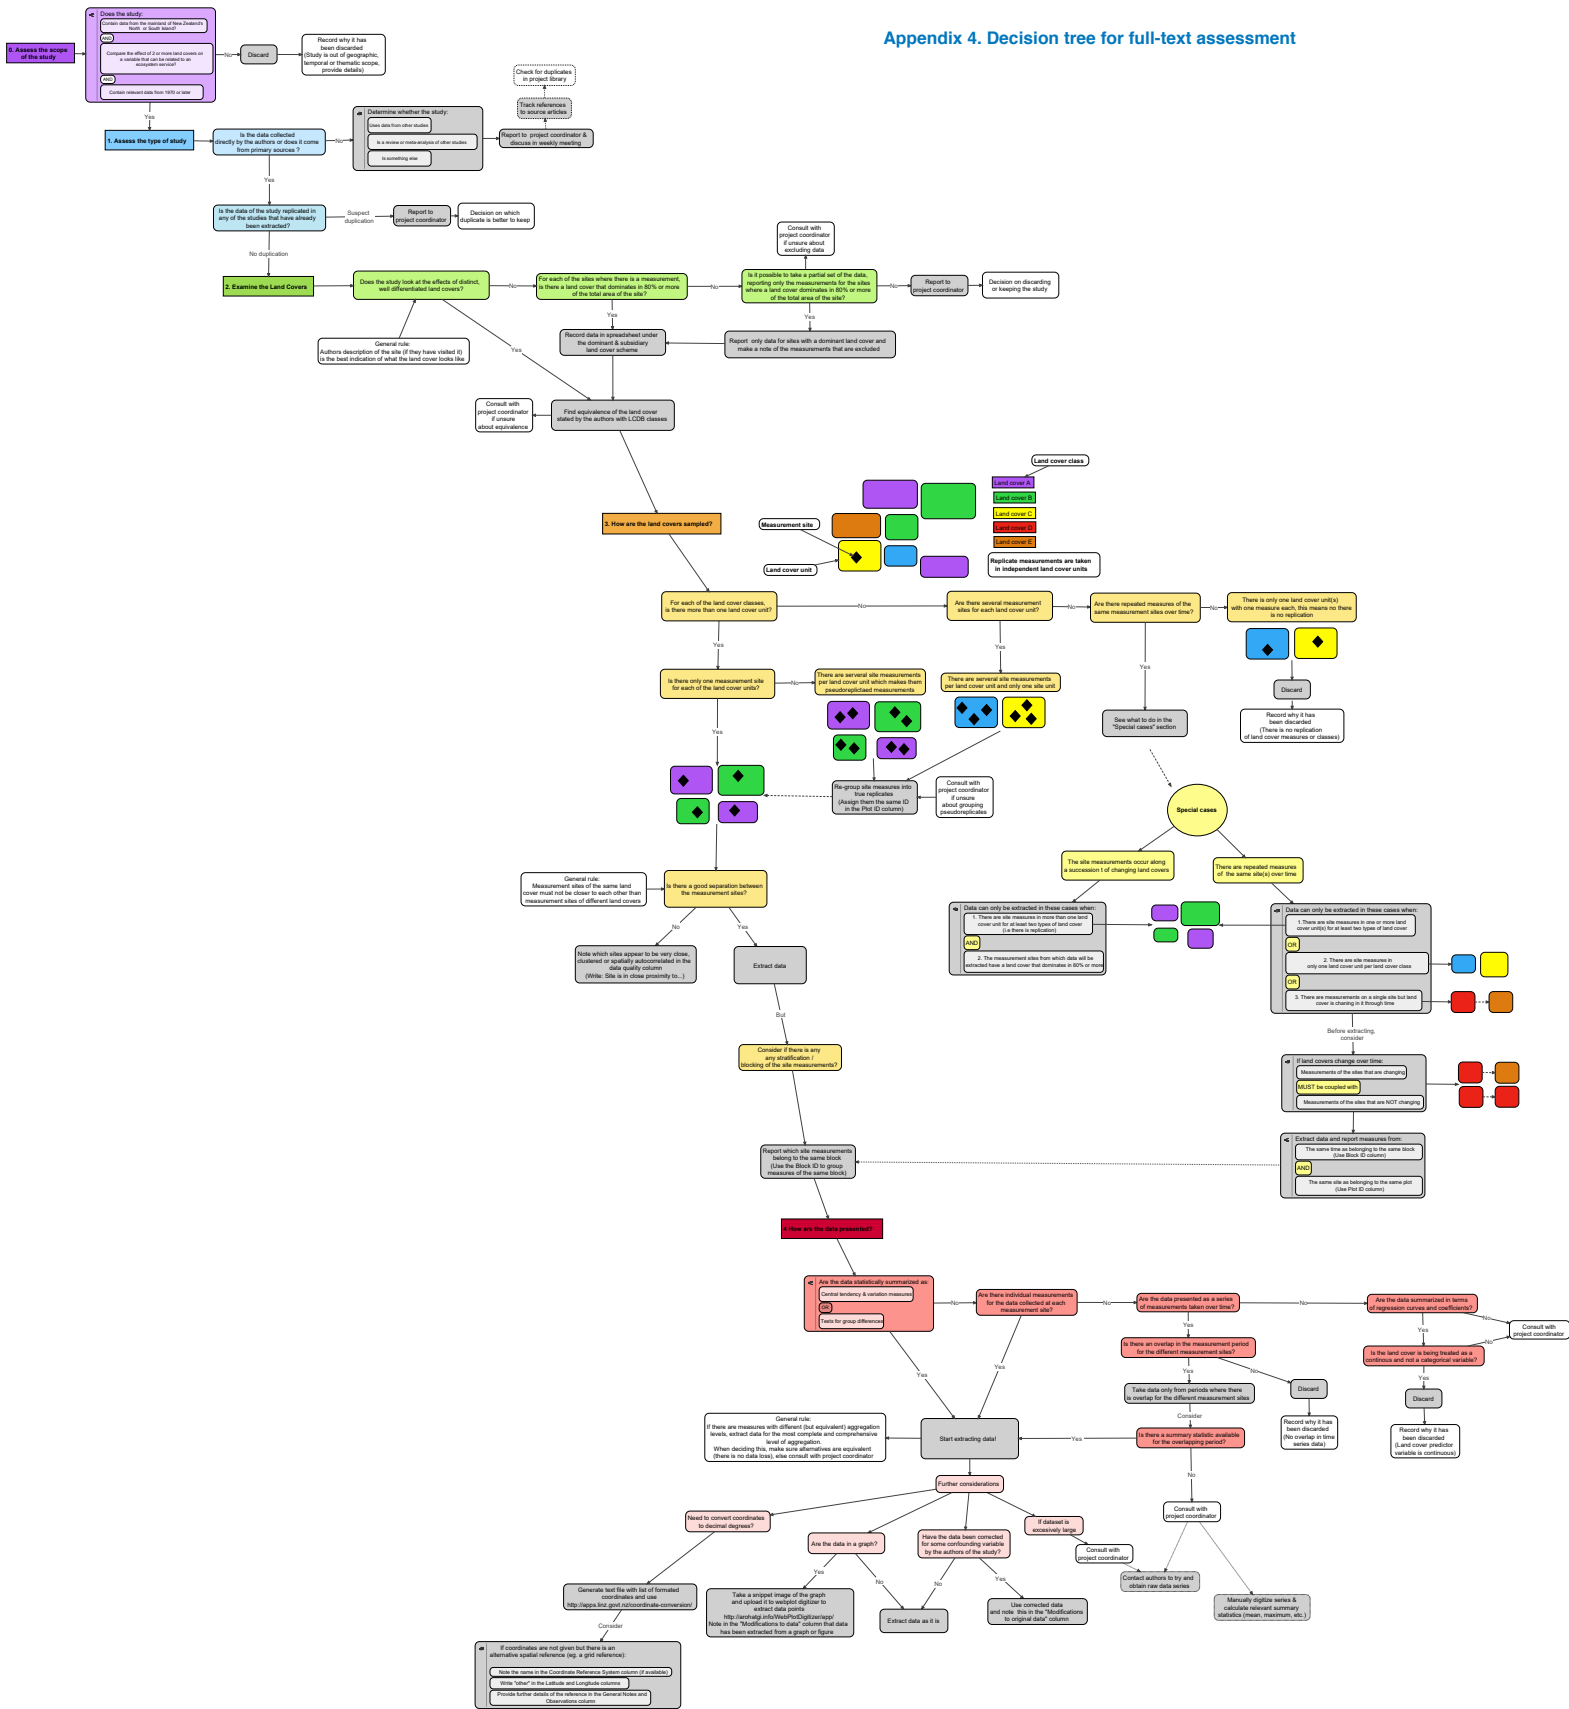

Fig. S1: Decision tree with the selection criteria used in the full-text assessment of publications with relevant abstracts for our review.

363 **Appendix 5. List of studies included in our final dataset**

364 **Table S3.** Reference list for the studies included in our meta-analysis. The Study ID values  
365 are not sequential because they correspond to the unique identifier that each study  
366 received at the start of the literature screening process. They can be used to link the values  
367 presented in SI Dataset 2 to the bibliographical reference of each study.

| Study ID | Reference                                                                                                                                                                                                                                                                                                                             |
|----------|---------------------------------------------------------------------------------------------------------------------------------------------------------------------------------------------------------------------------------------------------------------------------------------------------------------------------------------|
| S0008    | Fahey, B. & Watson, A. (1991). Hydrological impacts of converting tussock grassland to pine plantation, Otago, New Zealand. <i>New Zealand Journal of Hydrology</i> , 30, 1–15.                                                                                                                                                       |
| S0010    | Tate, K.R., Ross, D.J., Saggart, S., Hedley, C.B., Dando, J. & Singh, B.K. et al. (2007). Methane uptake in soils from <i>Pinus radiata</i> plantations, a reverting shrubland and adjacent pastures: Effects of land-use change, and soil texture, water and mineral nitrogen. <i>Soil Biology and Biochemistry</i> , 39, 1437–1449. |
| S0011    | Yeates, G.W., Hawke, M.F. & Rijkse, W.C. (2000). Changes soil fauna and soil conditions under <i>Pinus radiata</i> agroforestry regimes during a 25-year tree rotation. <i>Biology and Fertility of Soils</i> , 31, 391–406.                                                                                                          |
| S0013    | Thompson, R.M. & Townsend, C.R. (2003). Impacts on Stream Food Webs of Native and Exotic Forest : An Intercontinental Comparison. <i>Ecology</i> , 84, 145–161.                                                                                                                                                                       |
| S0014    | Thompson, R.M. & Townsend, C.R. (2004b). Impacts of riparian afforestation on stream biofilms: An exotic forest-native grassland comparison. <i>New Zealand Journal of Marine and Freshwater Research</i> , 38, 895–902.                                                                                                              |
| S0015    | Giddens, K.M., Parfitt, R.L. & Percival, H.J. (1997). Comparison of some soil properties under <i>Pinus radiata</i> and improved pasture. <i>New Zealand Journal of Agricultural Research</i> , 40, 409–416.                                                                                                                          |
| S0017    | Adams, M.L., Davis, M.R. & Powell, K. (2001). Effects of grassland                                                                                                                                                                                                                                                                    |



| Study ID | Reference                                                                                                                                                                                                                                                 |
|----------|-----------------------------------------------------------------------------------------------------------------------------------------------------------------------------------------------------------------------------------------------------------|
|          | afforestation on exchangeable soil and soil solution aluminium. Australian Journal of Soil Research, 39, 1003–1014.                                                                                                                                       |
| S0019    | Quinn, J.M. & Stroud, M.J. (2002). Water quality and sediment and nutrient export from New Zealand hill-land catchments of contrasting land use. New Zealand Journal of Marine and Freshwater Research, 36, 409–429.                                      |
| S0020    | Boulton, A.J., Scarsbrook, M.R., Quinn, J.M. & Burrell, G.P. (1997). Land-use effects on the hyporheic ecology of five small streams near Hamilton, New Zealand. New Zealand Journal of Marine and Freshwater Research, 31, 609–622.                      |
| S0021    | Broekhuizen, N. & Quinn, J.M. (1998). Influences of stream size and catchment land-use on fine particulate organic matter retention in streams. New Zealand Journal of Marine and Freshwater Research, 32, 581–590.                                       |
| S0022    | Thompson, R.M. & Townsend, C.R. (2004c). Land-use influences on New Zealand stream communities: Effects on species composition, functional organisation, and food-web structure. New Zealand Journal of Marine and Freshwater Research, 38, 595–608.      |
| S0030    | Singh, B.K., Tate, K.R., Ross, D.J., Singh, J., Dando, J. & Thomas, N. et al. (2009). Soil methane oxidation and methanotroph responses to afforestation of pastures with <i>Pinus radiata</i> stands. Soil Biology and Biochemistry, 41, 2196–2205.      |
| S0035    | Jacobsen, L.B. (2012). Interacting effects of land use and landscape context on wild bees ( <i>Apoidea</i> ) in Canterbury, New Zealand. PhD thesis. University of Copenhagen.                                                                            |
| S0036    | Hughes, A.O., Quinn, J.M. & McKergow, L.A. (2012). Land use influences on suspended sediment yields and event sediment dynamics within two headwater catchments, Waikato, New Zealand. New Zealand Journal of Marine and Freshwater Research, 46, 315–333 |

| Study ID | Reference                                                                                                                                                                                                                                                                                                |
|----------|----------------------------------------------------------------------------------------------------------------------------------------------------------------------------------------------------------------------------------------------------------------------------------------------------------|
| S0047    | Fahey, B., Marden, M. & Phillips, C. (2003b). Sediment yields from plantation forestry and pastoral farming, coastal Hawke's Bay, North Island, New Zealand. <i>Journal of Hydrology New Zealand</i> , 42, 27–38.                                                                                        |
| S0048    | Sparling, G.P., Shepherd, T.G. & Schipper, L.A. (2000). Topsoil characteristics of three contrasting New Zealand soils under four long-term land uses. <i>New Zealand Journal of Agricultural Research</i> , 43, 569–583.                                                                                |
| S0050    | Quinn, J.M., Cooper, A.B., Davies-Colley, R.J., Rutherford, J.C. & Williamson, R.B. (1997). Land use effects on habitat, water quality, periphyton, and benthic invertebrates in Waikato, New Zealand, hill-country streams. <i>New Zealand Journal of Marine and Freshwater Research</i> , 31, 579–597. |
| S0051    | Hicks, B.J. & McCaughan, H.M. (1997). Land use, associated eel production, and abundance of fish and crayfish in streams in Waikato, New Zealand. <i>New Zealand Journal of Marine and Freshwater Research</i> , 31, 635–650.                                                                            |
| S0052    | Warburton, B., Cowan, P. & Shepherd, J. (2009). How many possums are now in New Zealand following control and how many would there be without it? - Landcare Research Contract Report LC0910/060. Landcare Research.                                                                                     |
| S0056    | Parkyn, S.M., Davies-Colley, R.J., Scarsbrook, M.R., Halliday, N.J., Nagels, J.W. & Marden, M. et al. (2006). Pine afforestation and stream health: a comparison of land-use in two soft rock catchments, East Cape, New Zealand. <i>New Zealand Natural Sciences</i> , 31, 113–135.                     |
| S0057    | Duncan, M.J. (1995). Hydrological impacts of converting pasture and gorse to pine plantation, and forest harvesting, Nelson, New Zealand. <i>Journal of Hydrology (NZ)</i> , 34, 15–41.                                                                                                                  |
| S0060    | Mark, A.F. & Rowley, J. (1976). Water Yield of Low-Alpine Snow Tussock Grassland in Central Otago. <i>Journal of Hydrology (NZ)</i> , 15, 59 - 79.                                                                                                                                                       |

| Study ID    | Reference                                                                                                                                                                                                                                                     |
|-------------|---------------------------------------------------------------------------------------------------------------------------------------------------------------------------------------------------------------------------------------------------------------|
| S0061       | Holdsworth, D.K. & Mark, A.F. (1990). Water and nutrient input:output budgets: effects of plant cover at seven sites in upland snow tussock grasslands of eastern and central Otago, New Zealand. <i>Journal - Royal Society of New Zealand</i> , 20, 1–24.   |
| S10035      | Selby, M.J. & Hosking, P.J. (1973). The erodibility of pumice soils of the North Island, New Zealand. <i>Journal of Hydrology New Zealand</i> , 12, 32–56.                                                                                                    |
| S10168      | Cotching, W.E., Allbrook, R.F. & Gibbs, H.S. (1979). Influence of maize cropping on the soil structure of two soils in the Waikato district, New Zealand. <i>New Zealand Journal of Agricultural Research</i> , 22, 431–438.                                  |
| S10174      | Mosley, M.P. (1979). Sediment sources in the Harper-Avoca Catchment - New Zealand Forest Service Technical Paper No.68. New Zealand Forest Service, Wellington.                                                                                               |
| S10286      | O'Loughlin, C.L., Rowe, L.K. & Pearce, A.J. (1982). Exceptional Storm Influences on Slope Erosion and Sediment Yield in Small Forest Catchments, North Westland, New Zealand. In: <i>The first national symp. on forest hydrology</i> . Melbourne, pp. 84–91. |
| S10908      | Moore, T.R. (1989). Dynamics of dissolved organic carbon in forested and disturbed catchments, Westland, New Zealand. <i>Water Resources Research</i> , 25, 1331–1339.                                                                                        |
| S11177      | Harris, R.J., Thomas, C.D. & Moller, H. (1991). The influence of habitat use and foraging on the replacement of one introduced wasp species by another in New Zealand. <i>Ecological Entomology</i> , 16, 441–448.                                            |
| S11224EX003 | Sparling, G.P. (1992). Ratio of microbial biomass carbon to soil organic carbon as a sensitive indicator of changes in soil organic matter. <i>Soil Research</i> , 30, 195–207.                                                                               |
| S11336      | Sparling, G.P. & Searle, P. (1993). Dimethyl sulphoxide reduction as a sensitive indicator of microbial activity in soil: The relationship with                                                                                                               |

| Study ID | Reference                                                                                                                                                                                                                                                                           |
|----------|-------------------------------------------------------------------------------------------------------------------------------------------------------------------------------------------------------------------------------------------------------------------------------------|
|          | microbial biomass and mineralization of nitrogen and sulphur. <i>Soil Biology and Biochemistry</i> , 25, 251–256.                                                                                                                                                                   |
| S11397   | Linklater, W. & Winterbourn, M.J. (1993). Life histories and production of two trichopteran shredders in New Zealand streams with different riparian vegetation. <i>New Zealand Journal of Marine and Freshwater Research</i> , 27, 61–70.                                          |
| S11528   | Murphy, E.C. & Dowding, J.E. (1994). Range and diet of stoats ( <i>Mustela erminea</i> ) in a New Zealand beech forest. <i>New Zealand Journal of Ecology</i> , 18, 11–18.                                                                                                          |
| S11694   | Bergin, D.O., Kimberley, M.O. & Marden, M. (1995). Protective value of regenerating tea tree stands on erosion-prone hill country, East Coast, North Island, New Zealand. <i>New Zealand Journal of Forestry Science</i> , 25, 3–19.                                                |
| S11817   | Edwards, E. & Huryn, A.D. (1996). Effect of riparian land use on contributions of terrestrial invertebrates to streams. <i>Hydrobiologia</i> , 337, 151–159.                                                                                                                        |
| S11863   | Young, R.G. & Huryn, A.D. (1996). Interannual variation in discharge controls ecosystem metabolism along a grassland river continuum. <i>Canadian Journal of Fisheries and Aquatic Sciences</i> , 53, 2199–2211.                                                                    |
| S11864   | Stankiewicz, M., Jowett, G.H., Roberts, M.G., Heath, D.D., Cowan, P. & Clark, J.M. et al. (1996). Internal and external parasites of possums ( <i>Trichosurus vulpecula</i> ) from forest and farmland, Wanganui, New Zealand. <i>New Zealand Journal of Zoology</i> , 23, 345–353. |
| S11912   | Friberg, N., Winterbourn, M.J., Shearer, K.A. & Larsen, S.E. (1997). Benthic communities of forest streams in the South Island, New Zealand: effects of forest type and location. <i>Archiv für Hydrobiologie</i> , 138, 289–306.                                                   |
| S11997   | Friberg, N. & Winterbourn, M.J. (1997). Effects of native and exotic forest                                                                                                                                                                                                         |

| Study ID | Reference                                                                                                                                                                                                                                                                                                                             |
|----------|---------------------------------------------------------------------------------------------------------------------------------------------------------------------------------------------------------------------------------------------------------------------------------------------------------------------------------------|
|          | on benthic stream biota in New Zealand: A colonization study. <i>Marine and Freshwater Research</i> , 48, 267–75.                                                                                                                                                                                                                     |
| S12036   | Yeates, G.W., Saggart, S. & Daly, B.K. (1997). Soil microbial C, N, and P, and microfaunal populations under <i>Pinus radiata</i> and grazed pasture land-use systems. <i>Pedobiologia</i> , 41, 549–565.                                                                                                                             |
| S12049   | Findlay, S., Hickey, C.W. & Quinn, J.M. (1997). Microbial enzymatic response to catchment-scale variations in supply of dissolved organic carbon. <i>New Zealand Journal of Marine and Freshwater Research</i> , 31, 701–706.                                                                                                         |
| S12051   | Fahey, B. & Jackson, R.J. (1997). Environmental effects of forestry at Big Bush Forest, South Island, New Zealand: I. Changes in water chemistry. <i>Journal of Hydrology (NZ)</i> , 36, 43–71.                                                                                                                                       |
| S12058   | Davies-Colley, R.J. (1997). Stream channels are narrower in pasture than in forest. <i>New Zealand Journal of Marine and Freshwater Research</i> , 31, 599–608.                                                                                                                                                                       |
| S12125   | Storey, R.G. & Cowley, D.R. (1997). Recovery of three New Zealand rural stream as they pass through native forest remnants. <i>Hydrobiologia</i> , 353, 63–76.                                                                                                                                                                        |
| S12178   | Wilcock, R.J., Nagels, J.W., McBride, G.B., Collier, K.J., Wilson, B.T. & Huser, B.A. (1998). Characterisation of lowland streams using a single-station diurnal curve analysis model with continuous monitoring data for dissolved oxygen and temperature. <i>New Zealand Journal of Marine and Freshwater Research</i> , 32, 67–79. |
| S12276   | Francis, G.S., Bartley, K.M. & Tabley, F.J. (1998). The effect of winter cover crop management on nitrate leaching losses and crop growth. <i>The Journal of Agricultural Science</i> , 131, 299–308.                                                                                                                                 |
| S12283   | Davies-Colley, R.J. & Quinn, J.M. (1998). Stream lighting in five regions of                                                                                                                                                                                                                                                          |

| Study ID | Reference                                                                                                                                                                                                                                                                  |
|----------|----------------------------------------------------------------------------------------------------------------------------------------------------------------------------------------------------------------------------------------------------------------------------|
|          | North Island, New Zealand: Control by channel size and riparian vegetation. <i>New Zealand Journal of Marine and Freshwater Research</i> , 32, 591–605.                                                                                                                    |
| S12425   | Scott, N.A., Tate, K.R., Ford-Robertson, J., Giltrap, D.J. & Smith, C.T. (1999). Soil carbon storage in plantation forests and pastures: land-use change implications. <i>Tellus B</i> , 51, 326–335.                                                                      |
| S12482   | Aslam, T., Choudhary, M.A. & Saggar, S. (1999). Tillage impacts on soil microbial biomass C, N and P, earthworms and agronomy after two years of cropping following permanent pasture in New Zealand. <i>Soil and Tillage Research</i> , 51, 103–111.                      |
| S12669   | Francis, G.S., Tabley, F.J. & White, K.M. (1999). Restorative crops for the amelioration of degraded soil conditions in New Zealand. <i>Australian Journal of Soil Research Aust. J. Soil Res</i> , 37, 1017–34.                                                           |
| S12681   | Schipper, L.A. & Sparling, G.P. (2000). Performance of Soil Condition Indicators Across Taxonomic Groups and Land Uses. <i>Soil Science Society of America Journal</i> , 64, 300.                                                                                          |
| S12799   | Murphy, C. & Robertson, A. (2000). Preliminary study of the effects of honey bees ( <i>Apis mellifera</i> ) in Tongariro National Park. <i>Science for conservation</i> , 139, 5–18.                                                                                       |
| S12815   | Whitmore, N., Alexander, D., Huryn, A.D., Arbuckle, C. & Jansma, F. (2000). Ecology and distribution of the freshwater crayfish <i>Paranephrops zealandicus</i> in Otago implications for conservation. - <i>Science for conservation</i> 148. Department of Conservation. |
| S12818   | White, J.D., Coops, N.C. & Scott, N.A. (2000). Estimates of New Zealand forest and scrub biomass from the 3-PG model. <i>Ecological Modelling</i> , 131, 175–190.                                                                                                          |
| S12865   | O'Donnell, C.F. (2000). Influence of season, habitat, temperature, and                                                                                                                                                                                                     |

| Study ID | Reference                                                                                                                                                                                                                                                      |
|----------|----------------------------------------------------------------------------------------------------------------------------------------------------------------------------------------------------------------------------------------------------------------|
|          | invertebrate availability on nocturnal activity of the new zealand long-tailed bat ( <i>Chalinolobus tuberculatus</i> ). <i>New Zealand Journal of Zoology</i> , 27, 207–221.                                                                                  |
| S13002   | Mahmood, B. & Wall, G.L. (2001). The environmental impact of sewage effluent irrigation onto land - A case study in New Zealand. <i>International Agricultural Engineering Journal</i> , 10, 209–230.                                                          |
| S13051   | Innes, J.G., King, C.M., Flux, M. & Kimberley, M.O. (2001). Population biology of the ship rat and Norway rat in Pureora forest park, 1983–87. <i>New Zealand Journal of Zoology</i> , 28, 57–78.                                                              |
| S13161   | McLay, C.D.A., Dragten, R., Sparling, G.P. & Selvarajah, N. (2001). Predicting groundwater nitrate concentrations in a region of mixed agricultural land use: A comparison of three approaches. <i>Environmental Pollution</i> , 115, 191–204.                 |
| S13208   | Hall, M.J., Closs, G.P. & Riley, R.H. (2001). Relationships between land use and stream invertebrate community structure in a South Island, New Zealand, coastal stream catchment. <i>New Zealand Journal of Marine and Freshwater Research</i> , 35, 591–603. |
| S13210   | Scarsbrook, M.R., Quinn, J.M., Halliday, J. & Morse, R. (2001). Factors controlling litter input dynamics in streams draining pasture, pine, and native forest catchments. <i>New Zealand Journal of Marine and Freshwater Research</i> , 35, 751–762.         |
| S13213   | Broad, T.L., Townsend, C.R., Closs, G.P. & Jellyman, D.J. (2001). Microhabitat use by longfin eels in New Zealand streams with contrasting riparian vegetation. <i>Journal of Fish Biology</i> , 59, 1385–1400.                                                |
| S13282   | Baillie, B.R. & Davies, T.R. (2002). Effects of land use on the channel morphology of streams in the Moutere Gravels, Nelson, New Zealand. <i>Journal of Hydrology New Zealand</i> , 41, 19–45.                                                                |

| Study ID | Reference                                                                                                                                                                                                                                                                                                                              |
|----------|----------------------------------------------------------------------------------------------------------------------------------------------------------------------------------------------------------------------------------------------------------------------------------------------------------------------------------------|
| S13283   | Rowe, D.K., Smith, J., Quinn, J.M. & Boothroyd, I. (2002). Effects of logging with and without riparian strips on fish species abundance, mean size, and the structure of native fish assemblages in Coromandel, New Zealand, streams. <i>New Zealand Journal of Marine and Freshwater Research</i> , 36, 67–79.                       |
| S13336   | McQueen, D.J. & Shepherd, T.G. (2002). Physical changes and compaction sensitivity of a fine-textured, poorly drained soil (Typic Endoaquept) under varying durations of cropping, Manawatu region, New Zealand. <i>Soil and Tillage Research</i> , 63, 93–107.                                                                        |
| S13361   | Parfitt, R.L., Parshotam, A. & Salt, G. (2002). Carbon turnover in two soils with contrasting mineralogy under long-term maize and pasture. <i>Australian Journal of Soil Research</i> , 40, 127–136.                                                                                                                                  |
| S13422   | Groenendijk, F.M., Condron, L.M. & Rijkse, W.C. (2002). Effects of afforestation on organic carbon, nitrogen and sulfur concentrations in New Zealand hill country soils. <i>Geoderma</i> , 108, 91–100.                                                                                                                               |
| S13524   | Prebble, M., Schallenberg, M., Carter, J. & Shulmeister, J. (2002). An analysis of phytolith assemblages for the quantitative reconstruction of late Quaternary environments of the Lower Taieri Plain, Otago, South Island, New Zealand I. Modern assemblages and transfer functions. <i>Journal of Paleolimnology</i> , 27, 393–413. |
| S13526   | Sparling, G.P. & Schipper, L.A. (2002). Ecological risk assessment: Soil quality at a national scale in New Zealand. <i>Journal of Environmental Quality</i> ; Madison, 31, 1848.                                                                                                                                                      |
| S13539   | Broad, T.L., Townsend, C.R., Closs, G.P. & Jellyman, D.J. (2002). Riparian land use and accessibility to fishers influence size class composition and habitat use by longfin eels in a New Zealand river. <i>Journal of Fish Biology</i> , 61, 1489–1503.                                                                              |



| Study ID | Reference                                                                                                                                                                                                                                                       |
|----------|-----------------------------------------------------------------------------------------------------------------------------------------------------------------------------------------------------------------------------------------------------------------|
| S13554   | Parkyn, S.M., Collier, K.J. & Hicks, B.J. (2002). Growth and population dynamics of crayfish <i>Paranephrops planifrons</i> in streams within native forest and pastoral land uses. <i>New Zealand Journal of Marine and Freshwater Research</i> , 36, 847–862. |
| S13582   | Choudhary, M., Akramkhanov, A. & Saggar, S. (2002). Nitrous oxide emissions from a New Zealand cropped soil: tillage effects, spatial and seasonal variability. <i>Agriculture, ecosystems &amp; environment</i> , 93, 33–43.                                   |
| S13628   | Bellingham, P.J. & Coomes, D.A. (2003). Grazing and community structure as determinants of invasion success by Scotch broom in a New Zealand montane shrubland. <i>Diversity and Distributions</i> , 9, 19–28.                                                  |
| S13746   | Riley, R.H., Townsend, C.R., Niyogi, D.K., Arbuckle, C.A. & Peacock, K.A. (2003). Headwater stream response to grassland agricultural development in New Zealand. <i>New Zealand Journal of Marine and Freshwater Research</i> , 37, 389–403.                   |
| S13757   | Haase, M. (2003). Clinal variation in shell morphology of the freshwater gastropod <i>Potamopyrgus antipodarum</i> along two hill-country streams in New Zealand. <i>Journal of the Royal Society of New Zealand</i> , 33, 549–560.                             |
| S13792   | McLaren, R.G., Clucas, L.M., Taylor, M.D. & Hendry, T. (2003). Leaching of macronutrients and metals from undisturbed soils treated with metal-spiked sewage sludge. 1. Leaching of macronutrients. <i>Australian Journal of Soil Research</i> , 41, 571–588.   |
| S13799   | Nyström, P., McIntosh, A.R. & Winterbourn, M.J. (2003). Top-down and bottom-up processes in grassland and forested streams. <i>Oecologia</i> , 136, 596–608.                                                                                                    |
| S13841   | Niyogi, D.K., Simon, K.S. & Townsend, C.R. (2003). Breakdown of tussock grass in streams along a gradient of agricultural development in New Zealand. <i>Freshwater Biology</i> , 48, 1698–1708.                                                                |

| Study ID | Reference                                                                                                                                                                                                                                                         |
|----------|-------------------------------------------------------------------------------------------------------------------------------------------------------------------------------------------------------------------------------------------------------------------|
| S13848   | Francis, G.S., Trimmer, L.A., Tregurtha, C.S., Williams, P.H. & Butler, R.C. (2003). Winter nitrate leaching losses from three land uses in the Pukekohe area of New Zealand. <i>New Zealand Journal of Agricultural Research</i> , 46, 215–224.                  |
| S13920   | Watts, L.F. & Hawke, R.M. (2003). The effects of urbanisation on hydrologic response: A study of two coastal catchments. <i>Journal of Hydrology New Zealand</i> , 42, 125–143.                                                                                   |
| S13924   | Parfitt, R.L., Scott, N.A., Ross, D.J., Salt, G. & Tate, K.R. (2003). Land-use change effects on soil C and N transformations in soils of High N status: comparisons under indigenous forest, pasture, and pine plantation. <i>Biogeochemistry</i> , 66, 203–221. |
| S13944   | McDowell, R.W., Derwry, J.J., Muirhead, R.W. & Paton, R.J. (2003). Cattle treading and phosphorus and sediment loss in overland flow from grazed cropland. <i>Australian Journal of Soil Research</i> , 41, 1521–1532.                                            |
| S14107   | Quinn, J.M., Boothroyd, I.K. & Smith, B.J. (2004). Riparian buffers mitigate effects of pine plantation logging on New Zealand streams: 2. Invertebrate communities. <i>Forest Ecology and Management</i> , 191, 129–146.                                         |
| S14116   | Schipper, L.A. & Lee, W.G. (2004). Microbial biomass, respiration and diversity in ultramafic soils of West Dome, New Zealand. <i>Plant and Soil</i> , 262, 151–158.                                                                                              |
| S14119   | Stevenson, B.A. (2004). Changes in phosphorus availability and nutrient status of indigenous forest fragments in Pastoral New Zealand Hill country. <i>Plant and Soil</i> , 262, 317–325.                                                                         |
| S14157   | Vink, C.J., Teulon, D.A., McLachlan, A.R. & Stufkens, M.A. (2004). Spiders ( <i>Araneae</i> ) and harvestmen ( <i>Opiliones</i> ) in arable crops and grasses in Canterbury, New Zealand. <i>New Zealand Journal of Zoology</i> , 31, 149–159.                    |
| S14172   | Boothroyd, I.K., Quinn, J.M., Langer, E.R., Costley, K.J. & Steward, G. (2004).                                                                                                                                                                                   |

| Study ID | Reference                                                                                                                                                                                                                                                                          |
|----------|------------------------------------------------------------------------------------------------------------------------------------------------------------------------------------------------------------------------------------------------------------------------------------|
|          | Riparian buffers mitigate effects of pine plantation logging on New Zealand streams: 1. Riparian vegetation structure, stream geomorphology and periphyton. <i>Forest Ecology and Management</i> , 194, 199–213.                                                                   |
| S14225   | McLaren, R.G., Clucas, L.M., Taylor, M.D. & Hendry, T. (2004). Leaching of macronutrients and metals from undisturbed soils treated with metal-spiked sewage sludge. 2. Leaching of metals. <i>Australian Journal of Soil Research</i> , 42, 459–471.                              |
| S14266   | Harris, R.J., Toft, R.J., Dugdale, J.S., Williams, P.A. & Rees, J.S. (2004). Insect assemblages in a native (kanuka – <i>Kunzea ericoides</i> ) and an invasive (gorse – <i>Ulex europaeus</i> ) shrubland. <i>New Zealand Journal of Ecology</i> , 28, 35–47.                     |
| S14315   | Sparling, G.P. & Schipper, L.A. (2004). Soil quality monitoring in New Zealand: Trends and issues arising from a broad-scale survey. <i>Agriculture, Ecosystems and Environment</i> , 104, 545–552.                                                                                |
| S14320   | Donnison, A., Ross, C. & Thorrold, B.S. (2004). Impact of land use on the faecal microbial quality of hill-country streams. <i>New Zealand Journal of Marine and Freshwater Research</i> , 38, 845–855.                                                                            |
| S14528   | Young, R.G., Quarterman, A.J., Eyles, R.F., Smith, R.A. & Bowden, W.B. (2005). Water quality and thermal regime of the Motueka River: Influences of land cover, geology and position in the catchment. <i>New Zealand Journal of Marine and Freshwater Research</i> , 39, 803–825. |
| S14626   | Sullivan, J.J., Timmins, S.M. & Williams, P.A. (2005). Movement of exotic plants into coastal native forests from gardens in northern New Zealand. <i>New Zealand Journal of Ecology</i> , 1, 1–10.                                                                                |
| S14719   | Death, R.G. & Zimmermann, E.M. (2005). Interaction between disturbance and primary productivity in determining stream invertebrate diversity. <i>Oikos</i> , 111, 392–402.                                                                                                         |
| S14732   | Leisnham, P.T., Slaney, D.P., Lester, P.J. & Weinstein, P. (2005). Increased                                                                                                                                                                                                       |

| Study ID | Reference                                                                                                                                                                                                                                      |
|----------|------------------------------------------------------------------------------------------------------------------------------------------------------------------------------------------------------------------------------------------------|
|          | larval mosquito densities from modified landuses in the Kapiti region, New Zealand: Vegetation, water quality, and predators as associated environmental factors. <i>EcoHealth</i> , 2, 313–322.                                               |
| S14840   | McDowell, R.W. (2006). Phosphorus and Sediment Loss in a Catchment with Winter Forage Grazing of Cropland by Dairy Cattle. <i>Journal of Environment Quality</i> , 35, 575.                                                                    |
| S14894   | McDowell, R.W. & Stewart, I. (2006). The phosphorus composition of contrasting soils in pastoral, native and forest management in Otago, New Zealand: Sequential extraction and $^{31}\text{P}$ NMR. <i>Geoderma</i> , 130, 176–189.           |
| S15119   | Harding, J.S., Claassen, K. & Evers, N. (2006). Can forest fragments reset physical and water quality conditions in agricultural catchments and act as refugia for forest stream invertebrates? <i>Hydrobiologia</i> , 568, 391–402.           |
| S15336   | Stark, J.D. & Maxted, J.R. (2007). A biotic index for New Zealand's soft-bottomed streams. <i>New Zealand Journal of Marine and Freshwater Research</i> , 41, 43–61.                                                                           |
| S15424   | Simon, K.S., Niyogi, D.K., Frew, R.D. & Townsend, C.R. (2007). Nitrogen dynamics in grassland streams of agricultural Nitrogen dynamics along a gradient development. <i>Limnology and Oceanography</i> , 52, 1246–1257.                       |
| S15451   | Ghani, A., Dexter, M., Carran, R.A. & Theobald, P.W. (2007). Dissolved organic nitrogen and carbon in pastoral soils: The New Zealand experience. <i>European Journal of Soil Science</i> , 58, 832–843.                                       |
| S15500   | Quinn, J.M., Phillips, N.R. & Parkyn, S.M. (2007). Factors influencing retention of coarse particulate organic matter in streams. <i>Earth Surface Processes and Landforms</i> , 32, 1186–1203.                                                |
| S15534   | Singh, B.K., Tate, K.R., Kolipaka, G., Hedley, C.B., Macdonald, C.A. & Millard, P. et al. (2007). Effect of afforestation and reforestation of pastures on the activity and population dynamics of methanotrophic bacteria. <i>Applied and</i> |

| Study ID | Reference                                                                                                                                                                                                                                                                                            |
|----------|------------------------------------------------------------------------------------------------------------------------------------------------------------------------------------------------------------------------------------------------------------------------------------------------------|
|          | Environmental Microbiology, 73, 5153–5161.                                                                                                                                                                                                                                                           |
| S15577   | Dewson, Z.S., James, A.B.W. & Death, R.G. (2007). Stream ecosystem functioning under reduced flow conditions. <i>Ecological Applications</i> , 17, 1797–1808.                                                                                                                                        |
| S15817   | MacLeod, C.J., Parish, D.M. & Robinson, R.A. (2007). Niche Opportunities and Introduced Birds Temporal Variation in Resource Abundance. In: Temporal dimensions of landscape ecology (eds. Bissonette, J.A. & Storch, I.). Springer US, New York, New York, USA, pp. 252–268.                        |
| S15831   | Cadbury, S.L., Hannah, D.M., Milner, A.M., Pearson, C.P. & Brown, L.E. (2008). Stream temperature dynamics within a New Zealand glacierized river basin. <i>River Research and Applications</i> , 24, 68–89.                                                                                         |
| S16020   | Dodd, M.B., Quinn, J.M., Thorrold, B.S., Parminter, T.G. & Wedderburn, M.E. (2008). Improving the economic and environmental performance of a New Zealand hill country farm catchment: 3. Short-term outcomes of land-use change. <i>New Zealand Journal of Agricultural Research</i> , 51, 155–169. |
| S16437   | Morgan, D.K., Waas, J.R. & Innes, J. (2009). An inventory of mammalian pests in a New Zealand city. <i>New Zealand Journal of Zoology</i> , 36, 23–33.                                                                                                                                               |
| S16511   | Quinn, J.M., Croker, G.F., Smith, B.J. & Bellingham, M.A. (2009). Integrated catchment management effects on flow, habitat, instream vegetation and macroinvertebrates in Waikato, New Zealand, hill-country streams. <i>New Zealand Journal of Marine and Freshwater Research</i> , 43, 775–802.    |
| S16849   | Carswell, F., Burrows, L. & Mason, N. (2009). Above-ground carbon sequestration by early-successional woody vegetation: A preliminary analysis - Science for Conservation 297. Department of Conservation, Wellington.                                                                               |
| S16935   | Zheng, T., Hamel, K.L. & Buddle, B.M. (2010). A serological survey of the prevalence of antibodies against enteroviruses in brushtail possums                                                                                                                                                        |

| Study ID | Reference                                                                                                                                                                                                                                                                              |
|----------|----------------------------------------------------------------------------------------------------------------------------------------------------------------------------------------------------------------------------------------------------------------------------------------|
|          | <i>(Trichosurus vulpecula)</i> in New Zealand: Enteroviruses have a limited distribution in brushtail possums. <i>New Zealand Veterinary Journal</i> , 58, 23–28.                                                                                                                      |
| S16958   | McKergow, L.A., Pritchard, M., Elliott, A.H., Duncan, M.J. & Senior, A.K. (2010). Storm fine sediment flux from catchment to estuary, Waitetuna-Raglan Harbour, New Zealand. <i>New Zealand Journal of Marine and Freshwater Research</i> , 44, 53–76.                                 |
| S17210   | Price, S., Whitehead, D., Sherlock, R., McSeveny, T. & Rogers, G. (2010). Net exchange of greenhouse gases from soils in an unimproved pasture and regenerating indigenous <i>Kunzea ericoides</i> shrubland in New Zealand. <i>Australian Journal of Soil Research</i> , 48, 385–394. |
| S17301   | Reid, D.J., Quinn, J.M. & Wright-Stow, A.E. (2010). Responses of stream macroinvertebrate communities to progressive forest harvesting: Influences of harvest intensity, stream size and riparian buffers. <i>Forest Ecology and Management</i> , 260, 1804–1815.                      |
| S17776   | Shearer, K.A. & Young, R.G. (2011). Influences of geology and land use on macroinvertebrate communities across the Motueka River catchment, New Zealand. <i>New Zealand Journal of Marine and Freshwater Research</i> , 45, 437–454.                                                   |
| S18250   | Knox, C.D., Cree, A. & Seddon, P.J. (2012). Direct and Indirect Effects of Grazing by Introduced Mammals on a Native, Arboreal Gecko ( <i>Naultinus gemmeus</i> ). <i>Journal of Herpetology</i> , 46, 145–152.                                                                        |
| S18389   | Tate, K.R., Walcroft, A.S. & Pratt, C. (2012). Varying atmospheric methane concentrations affect soil methane oxidation rates and methanotroph populations in pasture, an adjacent pine forest, and a landfill. <i>Soil Biology and Biochemistry</i> , 52, 75–81.                      |
| S18515   | Hewitt, A., Forrester, G., Fraser, S., Hedley, C.B., Lynn, I. & Payton, I. (2012). Afforestation effects on soil carbon stocks of low productivity grassland in                                                                                                                        |

| Study ID | Reference                                                                                                                                                                                                                                                              |
|----------|------------------------------------------------------------------------------------------------------------------------------------------------------------------------------------------------------------------------------------------------------------------------|
|          | New Zealand. <i>Soil Use and Management</i> , 28, 508–516.                                                                                                                                                                                                             |
| S18879   | Fraser, P.M., Curtin, D., Harrison-Kirk, T., Meenken, E.D., Beare, M.H. & Tabley, F.J. et al. (2013). Winter Nitrate Leaching under Different Tillage and Winter Cover Crop Management Practices. <i>Soil Science Society of America Journal</i> , 77, 1391.           |
| S19160   | Wakelin, S.A., Macdonald, L.M., O’Callaghan, M., Forrester, S.T. & Condon, L.M. (2014). Soil functional resistance and stability are linked to different ecosystem properties. <i>Austral Ecology</i> , 39, 522–531.                                                   |
| S19193   | Waterhouse, B.R., Adair, K.L., Boyer, S. & Wratten, S.D. (2014). Advanced mine restoration protocols facilitate early recovery of soil microbial biomass, activity and functional diversity. <i>Basic and Applied Ecology</i> , 15, 599–606.                           |
| S19214   | Rader, R., Bartomeus, I., Tylianakis, J.M. & Laliberté, E. (2014). The winners and losers of land use intensification: Pollinator community disassembly is non-random and alters functional diversity. <i>Diversity and Distributions</i> , 20, 908–917.               |
| S19282   | Miller, A.L., Diez, J.M., Sullivan, J.J., Wangen, S.R., Wisser, S.K. & Meffin, R. et al. (2014). Quantifying invasion resistance: the use of recruitment functions to control for propagule pressure. <i>Ecology</i> , 95, 920–929.                                    |
| S19506   | Rahman, M.H., Holmes, A.W. & Saunders, S.J. (2014). Spatio-temporal variation in soil organic carbon under kiwifruit production systems of New Zealand. <i>Acta Horticulturae</i> , 1018, 279–286.                                                                     |
| S19543   | Sparling, G.P., Lewis, R., Schipper, L.A., Mudge, P. & Balks, M. (2014). Changes in soil total C and N contents at three chronosequences after conversion from plantation pine forest to dairy pasture on a New Zealand Pumice soil. <i>Soil Research</i> , 52, 38–45. |
| S19544   | Mudge, P., Schipper, L.A., Baisden, W., Ghani, A. & Lewis, R. (2014). Changes                                                                                                                                                                                          |

| Study ID | Reference                                                                                                                                                                                                                                                                                                                                 |
|----------|-------------------------------------------------------------------------------------------------------------------------------------------------------------------------------------------------------------------------------------------------------------------------------------------------------------------------------------------|
|          | in soil C, N and 15N along three forest-pasture chronosequences in New Zealand. <i>Soil Research</i> , 52, 27–37.                                                                                                                                                                                                                         |
| S19646   | Wilson, D.J., Norbury, G. & Walker, S. (2014). How does woody succession affect population densities of passerine birds in New Zealand drylands? <i>New Zealand Journal of Ecology</i> , 38, 257–267.                                                                                                                                     |
| S20016   | Chen, C.R., Condrón, L.M., Davis, M.R. & Sherlock, R. (2003). Seasonal changes in soil phosphorus and associated microbial properties under adjacent grassland and forest in New Zealand. <i>Forest Ecology and Management</i> , 177, 539–557.                                                                                            |
| S20029   | Davis, M.R. & Lang, M.H. (1991). Increased nutrient availability in topsoils under conifers in the South Island high country. <i>New Zealand Journal of Forestry Science</i> , 21, 165–179.                                                                                                                                               |
| S20058   | Kasai, M., Brierley, G.J., Page, M.J., Marutani, T. & Trustrum, N.A. (2005). Impacts of land use change on patterns of sediment flux in Weraamaia catchment, New Zealand. <i>Catena</i> , 64, 27–60.                                                                                                                                      |
| S20084   | Oliver, G.R., Beets, P.N., Garrett, L.G., Pearce, S.H., Kimberly, M.O. & Ford-Robertson, J. et al. (2004). Variation in soil carbon in pine plantations and implications for monitoring soil carbon stocks in relation to land-use change and forest site management in New Zealand. <i>Forest Ecology and Management</i> , 203, 283–295. |
| S20087   | Parfitt, R.L., Percival, H.J., Dahlgren, R.A. & Hill, L.F. (1997). Soil and solution chemistry under pasture and radiata pine in New Zealand. <i>Plant and Soil</i> , 191, 279–290.                                                                                                                                                       |
| S20088   | Parfitt, R.L. & Ross, D.J. (2011). Long-term effects of afforestation with <i>Pinus radiata</i> on soil carbon, nitrogen, and pH: A case study. <i>Soil Research</i> , 49, 494–503.                                                                                                                                                       |
| S20106   | Ross, D.J., Tate, K.R., Scott, N.A., Wilde, R.H., Rodda, N.J. & Townsend, J.A.                                                                                                                                                                                                                                                            |



| Study ID | Reference                                                                                                                                                                                                                                    |
|----------|----------------------------------------------------------------------------------------------------------------------------------------------------------------------------------------------------------------------------------------------|
|          | (2002). Afforestation of pastures with <i>Pinus radiata</i> influences soil carbon and nitrogen pools and mineralisation and microbial properties. Australian Journal of Soil Research, 40, 1303–1318.                                       |
| S20108   | Rowe, D.K., Chisnall, B.L., Dean, T.L. & Richardson, J. (1999). Effects of land use on native fish communities in east coast streams of the North Island of New Zealand. New Zealand Journal of Marine and Freshwater Research, 33, 141–151. |
| S20128   | Townsend, C.R., Downes, B.J., Peacock, K.A. & Arbuckle, C.J. (2004). Scale and the detection of land-use effects on morphology, vegetation and macroinvertebrate communities of grassland streams. Freshwater Biology, 49, 448–462.          |
| S20129   | Townsend, C.R., Thompson, R.M., McIntosh, A.R., Kilroy, C., Edwards, E. & Scarsbrook, M.R. (1998). Disturbance, resource supply, and food web architecture in streams. Ecology Letters, 1, 200–209                                           |

368

369

370 **Appendix 6. Conversion of confidence intervals to variance and imputation of missing values**

371 *Conversion of 95% confidence intervals to variance*

372 
$$s^2 = \frac{95\%CI}{t - critical} \times \sqrt{n}$$

373 Where  $s^2$  denotes the variance, 95%CI corresponds to the 95% confidence interval and  $n$  is  
374 the sample size reported by the authors. The  $t$ -critical value is the value in the  $t$ -  
375 distribution for the corresponding alpha and degrees of freedom. For all studies in our  
376 dataset where we needed to apply this conversion, the degrees of freedom were not  
377 available so we approximated the  $t$ -critical value as two. This was done because the two-  
378 sided  $t$ -distribution values for an alpha of 0.05 range between 2.57 and asymptote at 1.96  
379 for 5 or more degrees of freedom.

380 *Regression model for applying Taylor's Law*

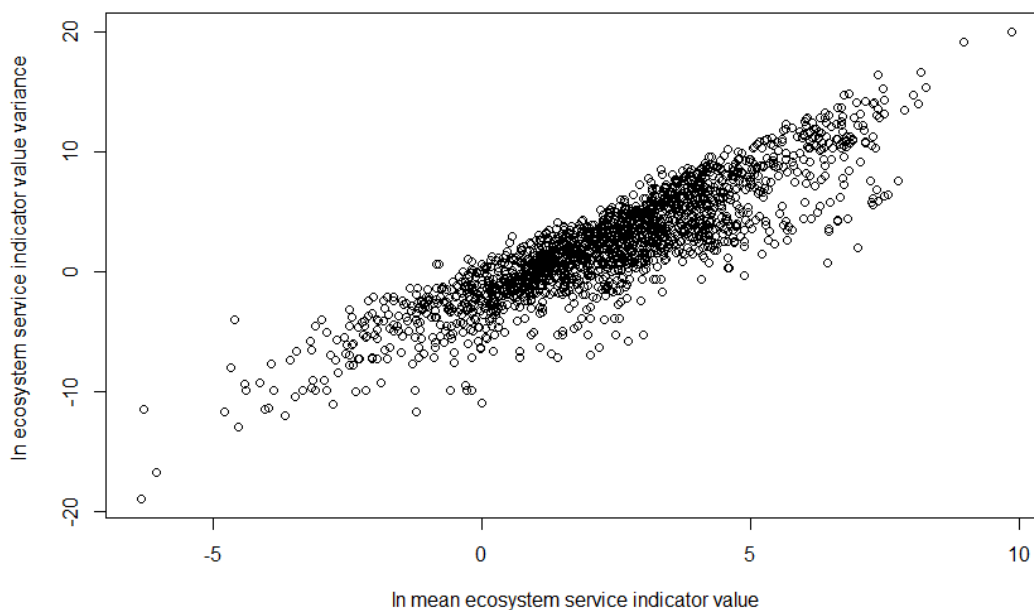

381  
382 **Fig. S2.** *Regression (in natural logarithm space) of the mean ecosystem service indicator*  
383 *values for all land covers reported in our dataset into their corresponding variances.*

384 The equation used to impute variances from means based on regression coefficients from  
385 the relation between both in natural logarithm space is shown below. Coefficients are given  
386 to three decimal places in the equation, however their full values were used in the actual  
387 calculation of the imputed values.

388 
$$s_{imp}^2 = e^{[-2.147 + (1.878 \times \ln(|x|])}$$

389 Where  $s_{imp}^2$  is the imputed variance and  $x$  the mean used for the imputation.

390 **Appendix 7. Summary of log Response Ratios per land cover and ecosystem service**  
 391 **combination.**

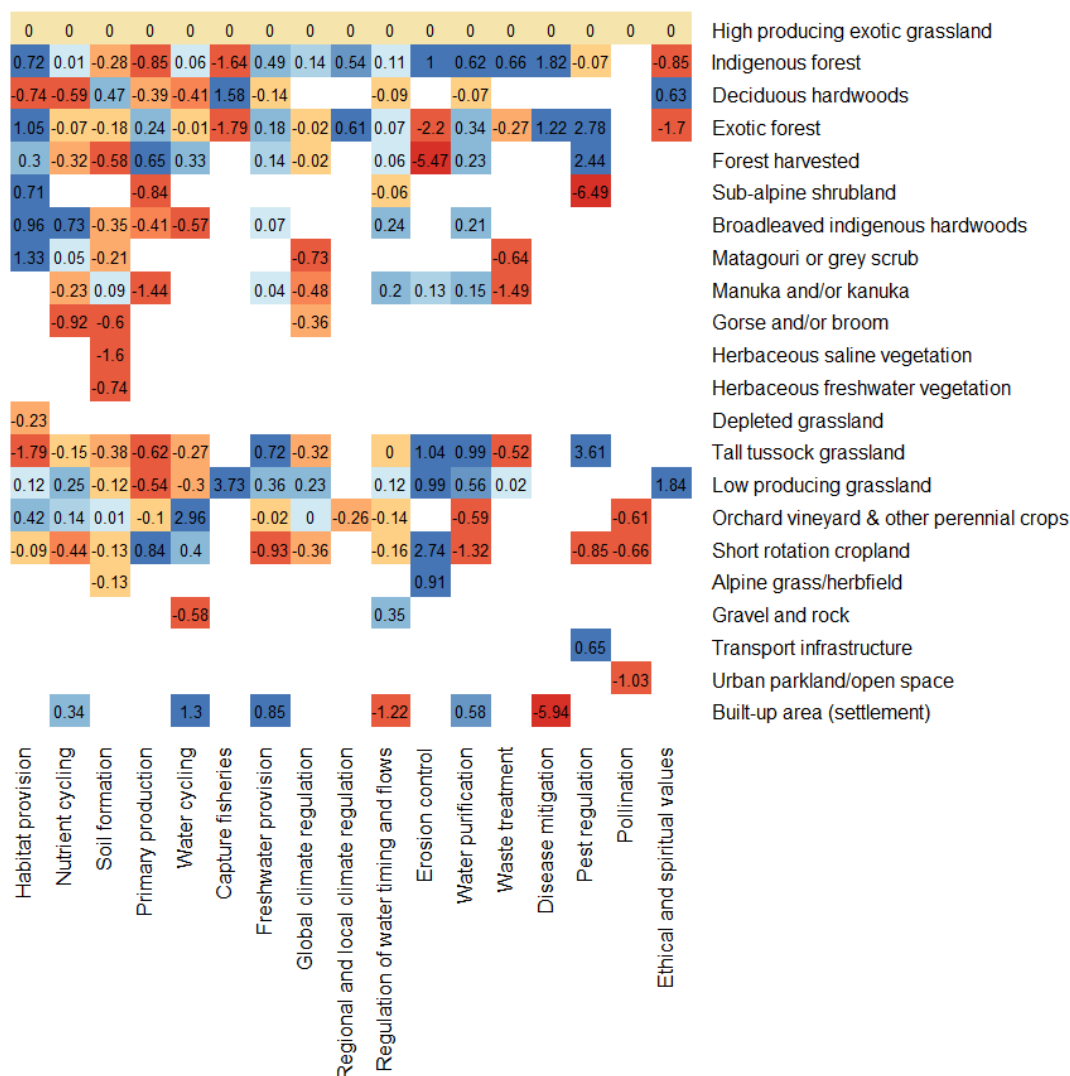

392  
 393 **Fig. S3.** Aggregated log Response Ratios of ecosystem service provision across land covers.  
 394 Values are given relative to the high producing exotic grassland reference. Red-orange tones  
 395 highlight cases where the land covers perform comparatively worse than the reference in the  
 396 provision of a service, while blue tones signal land covers that perform comparatively better.  
 397 The darker the blue or red-orange tone, the greater the ratio separating the land cover to the  
 398 reference in the provision of the corresponding service.

399 **Appendix 8. Classification of land covers and ecosystem services for PERMANOVA analysis**

400 **Table S4.** Delimitation of categorical variables used in PERMANOVA of land cover effects  
 401 across ecosystem services

| Land cover                               | Forest Cover | Production | Type of vegetation cover |
|------------------------------------------|--------------|------------|--------------------------|
| Indigenous forest                        | Present      | No         | Native                   |
| Deciduous hardwoods                      | Present      | No         | Exotic                   |
| Exotic forest                            | Present      | Yes        | Exotic                   |
| Forest harvested                         | Present      | Yes        | Exotic                   |
| Broadleaved indigenous hardwoods         | Present      | No         | Native                   |
| Tall tussock grassland                   | Absent       | No         | Native                   |
| Low producing grassland                  | Absent       | No         | Native                   |
| High producing exotic grassland          | Absent       | Yes        | Exotic                   |
| Orchard vineyard & other perennial crops | Absent       | Yes        | Exotic                   |
| Short rotation cropland                  | Absent       | Yes        | Exotic                   |

402 Vegetation cover was not included in the analysis since all but one of land cover groups in  
 403 the native / exotic groups overlap with those in the production / non-production groups.

404 **Table S5.** Delimitation of categorical variables used in PERMANOVA of ecosystem service  
 405 provision across land covers

| Ecosystem service | Scale of benefits | Biophysical domain |
|-------------------|-------------------|--------------------|
| Habitat provision | Regional          | Biotic             |
| Nutrient cycling  | Local             | Edaphic            |
| Soil formation    | Local             | Edaphic            |

|                                      |          |            |
|--------------------------------------|----------|------------|
| Primary production                   | Local    | Biotic     |
| Water cycling                        | Global   | Hydrologic |
| Freshwater provision                 | Regional | Hydrologic |
| Global climate regulation            | Global   | Edaphic    |
| Regulation of water timing and flows | Regional | Hydrologic |
| Water purification                   | Regional | Hydrologic |

406

407

408 **Appendix 9. Overview of research effort for New Zealand**

409 Fig. S4 shows that all of the supporting ecosystem services are represented in our database,  
410 whereas for the remaining categories our data only offer partial coverage of their services,  
411 with information on: nine out of the 11 regulating services, two of the 15 provisioning  
412 services and one of the three cultural services defined for the project. For the categories  
413 that were represented by more than one ecosystem service in our database, the number of  
414 studies per service ranged from two to 54 for the regulating services; from five to 44 for the  
415 provisioning ones and from 29 to 60 in the supporting services. A total of five studies  
416 provide evidence for the single service in the cultural category in our database.

|                   |                  |                |                    |               |                   |                      |                           |                                       |                                      |                 |                    |                 |                    |                 |             |                              |       |                                          |
|-------------------|------------------|----------------|--------------------|---------------|-------------------|----------------------|---------------------------|---------------------------------------|--------------------------------------|-----------------|--------------------|-----------------|--------------------|-----------------|-------------|------------------------------|-------|------------------------------------------|
| 30                | 22               | 11             | 19                 | 16            | 3                 | 26                   | 7                         | 1                                     | 29                                   | 13              | 22                 | 2               | 4                  | 6               | 0           | 3                            | 58    | Indigenous forest                        |
| 2                 | 1                | 1              | 1                  | 1             | 1                 | 2                    | 0                         | 0                                     | 1                                    | 0               | 1                  | 0               | 0                  | 0               | 0           | 1                            | 2     | Deciduous hardwoods                      |
| 23                | 28               | 28             | 13                 | 14            | 2                 | 20                   | 21                        | 2                                     | 31                                   | 7               | 17                 | 5               | 2                  | 3               | 0           | 2                            | 62    | Exotic forest                            |
| 6                 | 3                | 2              | 3                  | 4             | 0                 | 5                    | 1                         | 0                                     | 7                                    | 3               | 5                  | 0               | 0                  | 2               | 0           | 0                            | 12    | Forest harvested                         |
| 1                 | 0                | 0              | 0                  | 0             | 0                 | 0                    | 0                         | 0                                     | 0                                    | 0               | 0                  | 0               | 0                  | 1               | 0           | 0                            | 1     | Mixed exotic shrubland                   |
| 1                 | 1                | 0              | 1                  | 0             | 0                 | 0                    | 0                         | 0                                     | 1                                    | 0               | 0                  | 0               | 0                  | 2               | 0           | 0                            | 4     | Sub-alpine shrubland                     |
| 4                 | 3                | 2              | 4                  | 2             | 0                 | 2                    | 0                         | 0                                     | 2                                    | 0               | 2                  | 0               | 0                  | 2               | 1           | 0                            | 9     | Broadleaved indigenous hardwoods         |
| 1                 | 1                | 1              | 0                  | 0             | 0                 | 0                    | 1                         | 0                                     | 0                                    | 0               | 0                  | 1               | 0                  | 2               | 0           | 0                            | 4     | Matagouri or grey scrub                  |
| 1                 | 4                | 5              | 1                  | 0             | 0                 | 1                    | 3                         | 0                                     | 1                                    | 2               | 1                  | 1               | 0                  | 2               | 0           | 0                            | 10    | Manuka and/or kanuka                     |
| 0                 | 1                | 1              | 0                  | 0             | 0                 | 0                    | 1                         | 0                                     | 0                                    | 0               | 0                  | 0               | 0                  | 1               | 0           | 0                            | 2     | Gorse and/or broom                       |
| 0                 | 0                | 0              | 0                  | 0             | 0                 | 0                    | 0                         | 0                                     | 0                                    | 0               | 0                  | 0               | 0                  | 0               | 1           | 0                            | 1     | Flaxland                                 |
| 0                 | 0                | 1              | 0                  | 0             | 0                 | 0                    | 0                         | 0                                     | 0                                    | 0               | 0                  | 0               | 0                  | 0               | 0           | 0                            | 1     | Herbaceous saline vegetation             |
| 0                 | 0                | 1              | 0                  | 0             | 0                 | 0                    | 0                         | 0                                     | 0                                    | 0               | 0                  | 0               | 0                  | 0               | 0           | 0                            | 1     | Herbaceous freshwater vegetation         |
| 1                 | 0                | 0              | 0                  | 0             | 0                 | 0                    | 0                         | 0                                     | 0                                    | 0               | 0                  | 0               | 0                  | 1               | 0           | 0                            | 2     | Depleted grassland                       |
| 9                 | 12               | 7              | 9                  | 6             | 0                 | 10                   | 1                         | 0                                     | 7                                    | 4               | 10                 | 2               | 0                  | 2               | 0           | 0                            | 19    | Tall tussock grassland                   |
| 7                 | 4                | 7              | 3                  | 4             | 2                 | 5                    | 3                         | 0                                     | 7                                    | 2               | 4                  | 1               | 0                  | 1               | 0           | 3                            | 18    | Low producing grassland                  |
| 36                | 45               | 37             | 22                 | 21            | 5                 | 33                   | 29                        | 2                                     | 40                                   | 15              | 28                 | 5               | 4                  | 2               | 2           | 4                            | 91    | High producing exotic grassland          |
| 2                 | 2                | 3              | 1                  | 1             | 0                 | 2                    | 3                         | 1                                     | 1                                    | 0               | 1                  | 0               | 0                  | 1               | 1           | 0                            | 6     | Orchard vineyard & other perennial crops |
| 6                 | 17               | 17             | 2                  | 2             | 0                 | 4                    | 12                        | 0                                     | 9                                    | 4               | 6                  | 0               | 0                  | 1               | 1           | 0                            | 24    | Short rotation cropland                  |
| 0                 | 0                | 1              | 0                  | 0             | 0                 | 0                    | 0                         | 0                                     | 0                                    | 1               | 0                  | 0               | 0                  | 0               | 0           | 0                            | 1     | Alpine grass/herbfield                   |
| 0                 | 0                | 0              | 0                  | 1             | 0                 | 0                    | 0                         | 0                                     | 1                                    | 0               | 0                  | 0               | 0                  | 1               | 0           | 0                            | 2     | Gravel and rock                          |
| 0                 | 0                | 0              | 0                  | 0             | 0                 | 0                    | 0                         | 0                                     | 0                                    | 0               | 0                  | 0               | 0                  | 1               | 0           | 0                            | 1     | Transport infrastructure                 |
| 0                 | 1                | 0              | 0                  | 0             | 0                 | 0                    | 0                         | 0                                     | 0                                    | 0               | 0                  | 0               | 0                  | 1               | 0           | 0                            | 2     | Surface mine & dump                      |
| 0                 | 0                | 0              | 0                  | 0             | 0                 | 0                    | 0                         | 0                                     | 0                                    | 0               | 0                  | 0               | 2                  | 2               | 0           | 0                            | 4     | Urban parkland/open space                |
| 0                 | 1                | 0              | 0                  | 1             | 0                 | 2                    | 0                         | 0                                     | 1                                    | 0               | 1                  | 0               | 1                  | 1               | 0           | 0                            | 3     | Built-up area (settlement)               |
| 50                | 60               | 51             | 32                 | 29            | 5                 | 44                   | 33                        | 2                                     | 54                                   | 22              | 40                 | 7               | 4                  | 13              | 3           | 5                            | 136   | Total                                    |
| Habitat provision | Nutrient cycling | Soil formation | Primary production | Water cycling | Capture fisheries | Freshwater provision | Global climate regulation | Regional and local climate regulation | Regulation of water timing and flows | Erosion control | Water purification | Waste treatment | Disease mitigation | Pest regulation | Pollination | Ethical and spiritual values | Total |                                          |

417

418 **Fig. S4.** Distribution of studies per ecosystem service and land cover. For most services, data  
 419 are concentrated along a selection of land covers: high producing exotic grassland (with a  
 420 total of 92 studies across all ecosystem services), exotic forest (64 studies in total), indigenous  
 421 forest (58 studies), short-rotation cropland (24 studies) and tall tussock grassland (20  
 422 studies). In addition, eight of the 43 land cover classes in the LCDB classification were not  
 423 present in our data base. These land cover classes were: “sand, gravel and rock” (i.e. the  
 424 coastal strip separating land from sea), “mangrove”, “fernland”, “landslide”, “permanent snow  
 425 and ice”, “lake or pond”, “river” and “estuarine open water”. The last three units correspond to  
 426 aquatic land covers which were not included in our review, whereas the remainder were  
 427 simply poorly represented within the literature used for our review. Note that the total row



428 *and column don't match the actual sum of column and row counts because our dataset*  
429 *includes studies with data on multiple ecosystems and land covers. Likewise, the row and*  
430 *column totals do not add up to the grand total in the lower right corner which, instead,*  
431 *corresponds to the total number of studies in our dataset.*

432 Since we aggregated data from studies with multiple indicators of the same service, the  
433 matrix in Fig. S4 effectively reflects the number of data points in our spreadsheet for each  
434 ecosystem service and land cover combination. The actual number of indicators for each  
435 ecosystem service - land cover combination are shown in Fig. S5 which indicates that,  
436 overall, the number of indicators follow a similar distribution to that of the number of  
437 studies. However, for the most common ecosystem service-land cover combinations in our  
438 dataset (e.g., soil formation or nutrient cycling in both exotic forest and high producing  
439 exotic grasslands) there were as many as four to five times more indicators than studies,  
440 suggesting that studies with multiple indicators were more frequent in the land covers and  
441 ecosystem services that were also more commonly studied.

|                   |               |                  |                        |                      |                         |                      |          |                              |                                  |                        |                         |                                 |                                        |                         |                 |                          |                   |                           |                                          |
|-------------------|---------------|------------------|------------------------|----------------------|-------------------------|----------------------|----------|------------------------------|----------------------------------|------------------------|-------------------------|---------------------------------|----------------------------------------|-------------------------|-----------------|--------------------------|-------------------|---------------------------|------------------------------------------|
| 0                 | 0             | 0                | 0                      | 2                    | 1                       | 1                    | 0        | 0                            | 0                                | 4                      | 3                       | 0                               | 3                                      | 4                       | 0               | 1                        | 1                 | 0                         | Indigenous forest                        |
| 0                 | 0             | 0                | 0                      | 0                    | 0                       | 1                    | 0        | 0                            | 0                                | 1                      | 1                       | 2                               | 0                                      | 0                       | 0               | 0                        | 0                 | 0                         | Deciduous hardwoods                      |
| 30                | 0             | 8                | 0                      | 1                    | 1                       | 1                    | 0        | 0                            | 0                                | 7                      | 6                       | 43                              | 3                                      | 4                       | 1               | 0                        | 1                 | 0                         | Exotic forest                            |
| 10                | 0             | 0                | 0                      | 0                    | 0                       | 0                    | 0        | 0                            | 0                                | 0                      | 0                       | 4                               | 0                                      | 1                       | 0               | 0                        | 0                 | 0                         | Forest harvested                         |
| 0                 | 0             | 0                | 0                      | 0                    | 0                       | 0                    | 0        | 0                            | 0                                | 1                      | 0                       | 0                               | 0                                      | 0                       | 0               | 0                        | 2                 | 0                         | Sub-alpine shrubland                     |
| 3                 | 4             | 1                | 0                      | 1                    | 1                       | 0                    | 1        | 1                            | 1                                | 2                      | 1                       | 2                               | 1                                      | 0                       | 1               | 0                        | 1                 | 1                         | Broadleaved indigenous hardwoods         |
| 0                 | 0             | 0                | 0                      | 1                    | 0                       | 0                    | 0        | 0                            | 0                                | 1                      | 0                       | 0                               | 1                                      | 0                       | 0               | 0                        | 1                 | 0                         | Matagouri or grey scrub                  |
| 0                 | 0             | 0                | 1                      | 0                    | 1                       | 0                    | 0        | 0                            | 0                                | 2                      | 0                       | 0                               | 0                                      | 0                       | 0               | 0                        | 0                 | 0                         | Manuka and/or kanuka                     |
| 0                 | 0             | 0                | 0                      | 0                    | 0                       | 2                    | 0        | 0                            | 0                                | 0                      | 0                       | 0                               | 0                                      | 0                       | 0               | 0                        | 0                 | 0                         | Gorse and/or broom                       |
| 1                 | 0             | 0                | 0                      | 0                    | 0                       | 0                    | 0        | 0                            | 0                                | 0                      | 0                       | 0                               | 0                                      | 0                       | 0               | 0                        | 0                 | 0                         | Herbaceous saline vegetation             |
| 1                 | 0             | 0                | 0                      | 0                    | 0                       | 0                    | 0        | 1                            | 0                                | 0                      | 0                       | 0                               | 0                                      | 0                       | 0               | 0                        | 0                 | 0                         | Herbaceous freshwater vegetation         |
| 1                 | 1             | 0                | 0                      | 0                    | 1                       | 0                    | 0        | 0                            | 0                                | 1                      | 1                       | 1                               | 0                                      | 0                       | 0               | 0                        | 0                 | 0                         | Depleted grassland                       |
| 0                 | 0             | 0                | 0                      | 0                    | 0                       | 0                    | 0        | 0                            | 0                                | 0                      | 0                       | 0                               | 0                                      | 0                       | 1               | 0                        | 0                 | 0                         | Tall tussock grassland                   |
| 0                 | 0             | 0                | 0                      | 0                    | 2                       | 1                    | 0        | 0                            | 0                                | 6                      | 0                       | 0                               | 1                                      | 1                       | 0               | 0                        | 0                 | 0                         | Low producing grassland                  |
| 35                | 0             | 0                | 0                      | 0                    | 0                       | 5                    | 0        | 0                            | 0                                | 7                      | 6                       | 0                               | 5                                      | 24                      | 0               | 0                        | 0                 | 2                         | High producing exotic grassland          |
| 0                 | 0             | 0                | 0                      | 1                    | 0                       | 0                    | 0        | 0                            | 0                                | 0                      | 0                       | 0                               | 0                                      | 4                       | 0               | 0                        | 1                 | 1                         | Orchard vineyard & other perennial crops |
| 0                 | 0             | 0                | 0                      | 0                    | 0                       | 0                    | 0        | 0                            | 0                                | 1                      | 0                       | 0                               | 0                                      | 0                       | 0               | 0                        | 0                 | 1                         | Short rotation cropland                  |
| 1                 | 0             | 0                | 0                      | 0                    | 0                       | 0                    | 0        | 0                            | 0                                | 0                      | 1                       | 0                               | 0                                      | 0                       | 0               | 0                        | 0                 | 0                         | Alpine grass/herbfield                   |
| 1                 | 0             | 0                | 0                      | 1                    | 1                       | 0                    | 0        | 0                            | 0                                | 1                      | 1                       | 0                               | 1                                      | 0                       | 0               | 0                        | 1                 | 0                         | Gravel and rock                          |
| 1                 | 0             | 0                | 0                      | 0                    | 0                       | 0                    | 0        | 0                            | 0                                | 0                      | 0                       | 2                               | 0                                      | 0                       | 0               | 0                        | 0                 | 1                         | Built-up area (settlement)               |
| Indigenous forest | Exotic forest | Forest harvested | Mixed exotic shrubland | Sub alpine shrubland | Matagouri or grey scrub | Manuka and or kanuka | Flaxland | Herbaceous saline vegetation | Herbaceous freshwater vegetation | Tall tussock grassland | Low producing grassland | High producing exotic grassland | Orchard vineyard other perennial crops | Short rotation cropland | Gravel and rock | Transport infrastructure | Surface mine dump | Urban parkland open space |                                          |

442

443 **Fig. S5.** Distribution of studies per land cover comparisons. Studies contributing data on  
 444 multiple ecosystem services are only counted once in each pair of land covers where they  
 445 contribute data.

446 **Appendix 10. Evidence base and network meta-analysis for individual ecosystem services**

447 *Regulation of water timing and flows*

448 **Type of indicators for this ecosystem service:** Comparisons for this ecosystem service  
449 were drawn from 36 indicators. The main aspects quantified by these indicators pertain to  
450 soil characteristics that either provide greater regulation by enhancing soil water retention  
451 or have detrimental effects in the provision of this service by promoting increased runoff.  
452 In addition, there are also some indicators on stream channel characteristics (such as its  
453 dimensions) that affect its ability to regulate water flow over time and that, to an extent,  
454 can be altered by land cover.

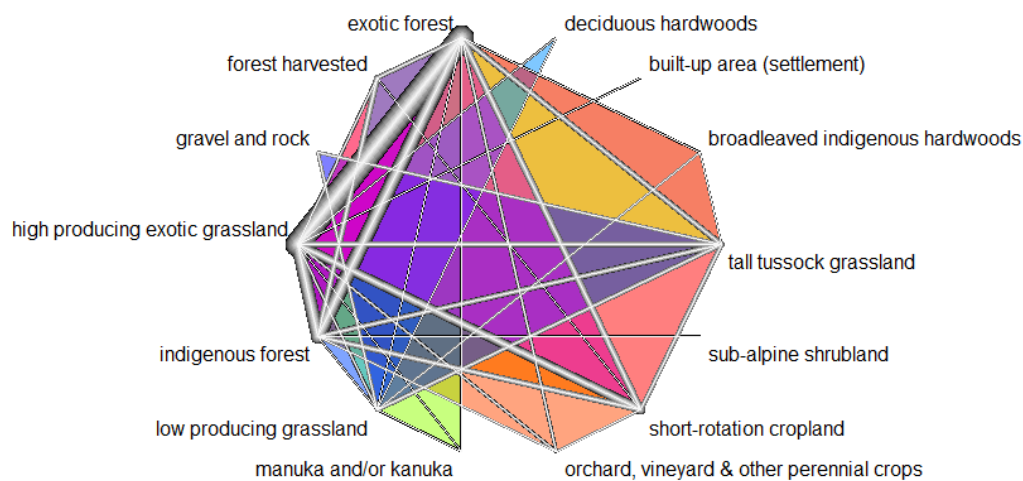

455

456 **Fig. S6.** Evidence network for land cover comparisons on regulation of water timing and  
457 flows. In all evidence network graphs, lines connect pairs of land covers that are compared in  
458 one or more studies and their thickness is inversely proportional to the standard error for the  
459 comparison, with thicker lines indicating smaller standard errors and, consequently, a greater  
460 evidence for the comparison. Shaded areas indicate the presence of multi-arm studies which  
461 compare three or more land covers.

462

463 **Evidence base:** This evidence network is formed by 126 pairwise comparisons of 14 land  
 464 covers. Data were obtained from 54 different studies, each contributing a minimum of one  
 465 and a maximum of four pairwise land cover comparisons. As indicated by the thicker lines  
 466 in Fig. S6, the land covers that are most commonly compared are:

- 467 • High producing exotic grassland (64 comparisons)
- 468 • Exotic forest (58 comparisons)
- 469 • Indigenous forest (50 comparisons)
- 470 • Short-rotation cropland (19 comparisons)

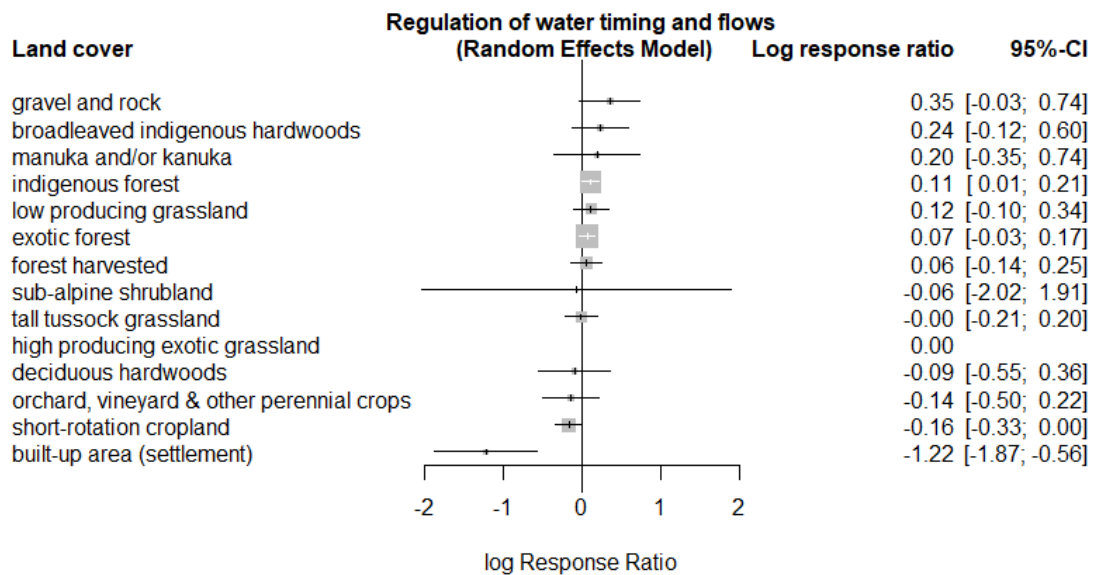

471

472 **Fig. S7.** Forest plot of land cover contrasts in the provision of regulation of water timing and  
 473 flows. Random effects model with high producing exotic grassland as a reference. Log  
 474 Response Ratios depicted here are the network meta-analysis model estimates of the overall  
 475 ratios between each land cover and high producing exotic grassland. The model accounts for  
 476 the direct and indirect comparisons in the evidence network, as well as the random effects  
 477 from having comparisons on the same land covers drawn from different studies. Bars indicate  
 478 the 95% confidence intervals for each estimate while grey boxes reflect the relative weight of  
 479 the comparison between each land cover and high producing exotic grassland in the overall

480 *model estimates. Comparisons that have greater weights are depicted with larger boxes. Land*  
481 *covers are presented in descending order of their P-Scores which are calculated from the*  
482 *magnitude and precision of the log Response Ratio estimates for each land cover and provide*  
483 *a means to rank treatment effects (i.e. land covers) according to their comparative*  
484 *effectiveness (6)*

485

486 **Measures of heterogeneity/network inconsistency:**

487  $\tau^2 = 0.165$

488  $I^2 = 53.452$

489 **Main results:**

- 490 • Overall there is a gradient from native vegetation (manuka/kanuka, broadleaved  
491 hardwoods and indigenous forest) to more artificial and production-oriented land  
492 covers (high producing exotic grassland, orchard, vineyard and perennials, harvested  
493 forest).
- 494 • Cropland, exotic forest both seem to behave similarly to indigenous forest, as do  
495 broadleaved indigenous hardwoods, manuka an/kanuka, and low producing  
496 grassland.
- 497 • Built-up area stands out as the worst performing land cover in terms of on regulation  
498 of water timing and flows, which is likely explained by the presence of impervious  
499 surfaces and channel morphologies that enhance runoff.
- 500 • The high infiltration capacity in gravel and rock probably accounts for its high ranking  
501 in the provision of this service.

502

503 *Nutrient cycling*

504 **Type of indicators for this ecosystem service:** Comparisons for this ecosystem service  
505 were drawn from 161 indicators, most of which focus on the cycling and flow of nutrients  
506 within the soil system and characteristics of the soil environment that promote or hinder

507 nutrient cycling. The latter were taken as negative indicators for the provision of nutrient  
508 cycling, as were the indicators on nutrient loss from the soil system. In addition, the data  
509 also include indicators on how land cover conditions plant uptake and the processing of  
510 nutrients both in the soil and freshwater systems. A large number of the indicators pertain  
511 to nitrogen and phosphorus however there is also information on other nutrients  
512 including: calcium, carbon, chlorine, copper, magnesium, potassium, sodium, sulfur and  
513 zinc (we have followed the Millennium Ecosystem Assessment (7) in their delimitation of  
514 the nutrients for this service as those relevant for plant growth).

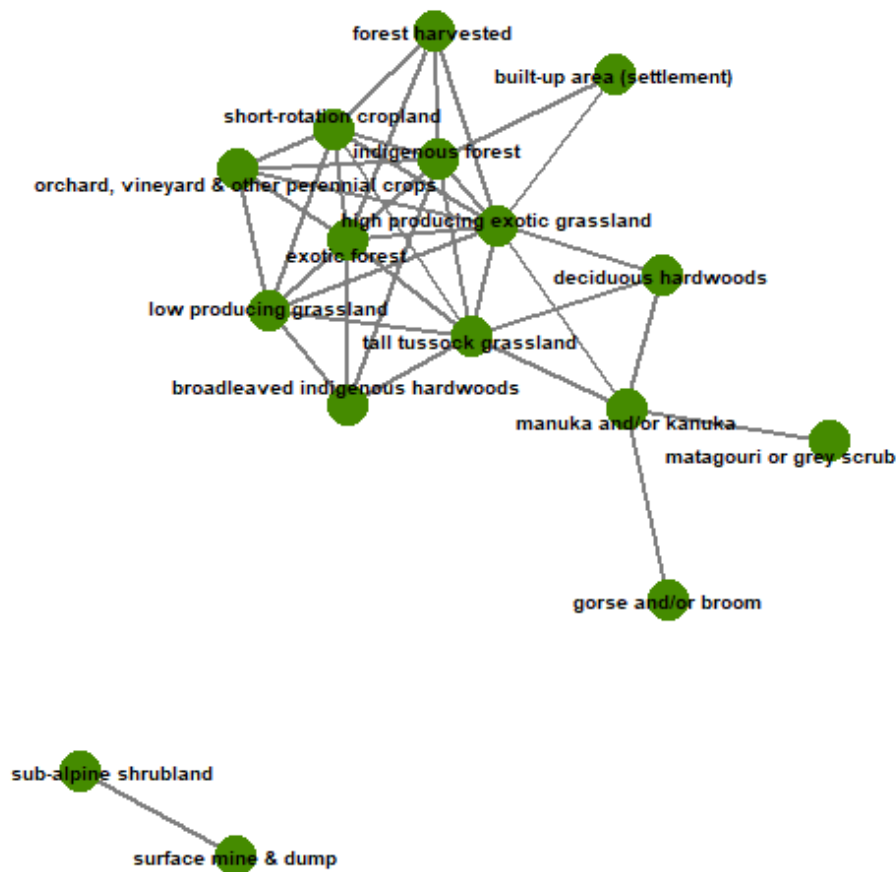

515

516 **Fig. S8.** Land-cover comparison networks for nutrient cycling.

517

518 **Evidence base:** The evidence base for this service is split into two networks of land cover  
519 comparisons depicted in Fig. S8. The smaller of these networks holds the comparison  
520 between sub-alpine shrubland and surface mine & dump, for which there is only evidence  
521 from a single study and, consequently, are not connected to any of the land covers in the  
522 larger network. In the smaller network the single study evidence defines a log Response  
523 Ratio of approximately 1.435 in favor of the sub-alpine shrubland over the surface mine &  
524 dump (the standard error of this estimate is approximately 0.054). In what follows we  
525 focus exclusively on the evidence base and network meta-analysis for the larger network of  
526 land covers in this service.

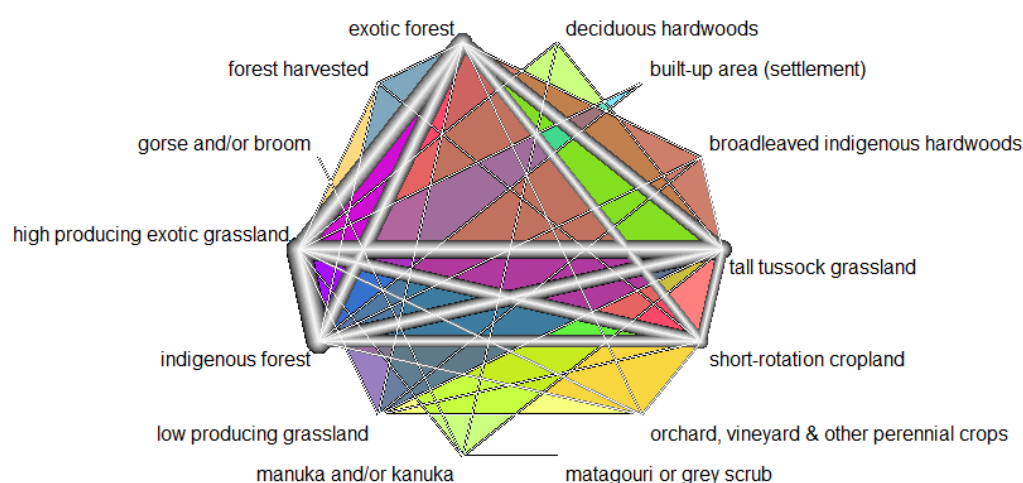

527

528 **Fig. S9.** Evidence network for land cover comparisons on nutrient cycling.

529 This evidence network is formed by 123 pairwise comparisons of 14 land covers. Data  
530 were obtained from 59 different studies, each contributing a minimum of one and a  
531 maximum of four pairwise land cover comparisons. As indicated by the thicker lines in Fig.  
532 S9, the land covers that are most commonly compared are:

- 533
- High producing exotic grassland (67 comparisons)

- 534 • Exotic forest (47 comparisons)
- 535 • Indigenous forest (39 comparisons)
- 536 • Short-rotation cropland (30 comparisons)

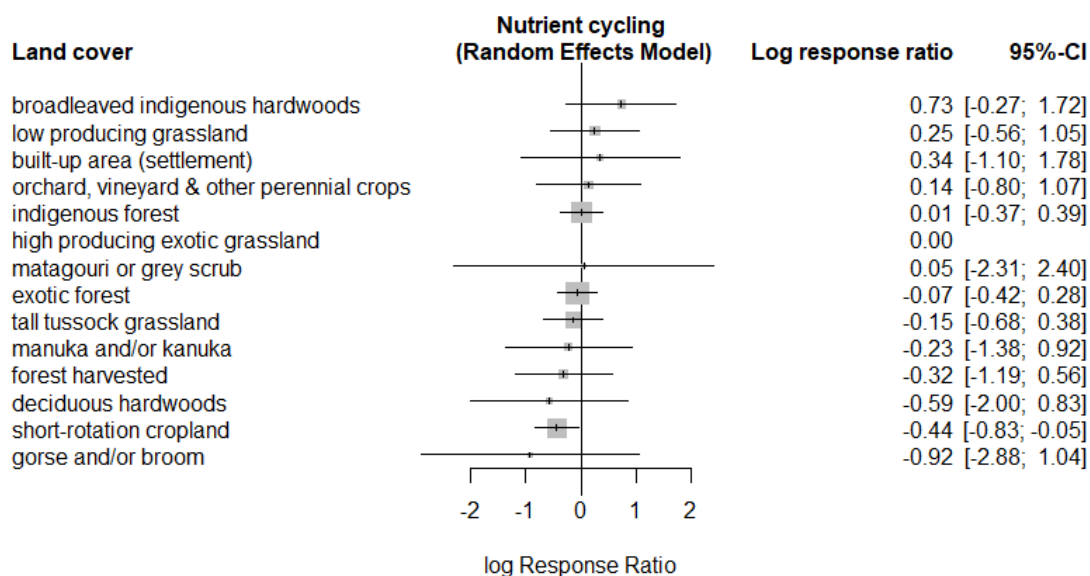

537

538 **Fig. S10.** Forest plot of land cover contrasts in the provision of nutrient cycling.

539

540 **Measures of heterogeneity/network inconsistency:**

541  $\tau^2 = 0.802$

542  $I^2 = 96.271$

543 **Main results:**

- 544 • With the exception of short-rotation cropland, the confidence intervals for most land
- 545 covers overlap the high producing exotic grassland reference. Moreover, exotic forests
- 546 and orchards, vineyards & other perennial crops also exhibit very small effect
- 547 estimates, suggesting they may share similar nutrient cycling dynamics to those found
- 548 in high producing exotic grasslands with artificial nutrient enrichment inducing more
- 549 dynamic processing rates in the soil system (8). On the contrary, short-rotation
- 550 croplands and other land covers dominated by exotic species but lacking the artificial



551 enrichment (forest harvested, deciduous hardwoods and gorse and/broom) perform  
552 worse in the provision of this service than the reference cover.

553 • The wider confidence intervals in the forest plot shown in Fig. S10 correspond to the  
554 land covers that had the least number of direct comparisons within the evidence  
555 network, while the land covers with narrower intervals are the ones that were  
556 informed by the greatest number of comparisons.

557

558 *Habitat provision*

559 **Type of indicators for this ecosystem service:** Comparisons for this ecosystem service  
560 were drawn from 80 indicators which, for the most part, expressed aspects relating to the  
561 availability of resources and/or conditions favorable to wildlife within a land cover, habitat  
562 occupation or use by native fauna and the health of native animal species within a given  
563 land cover.

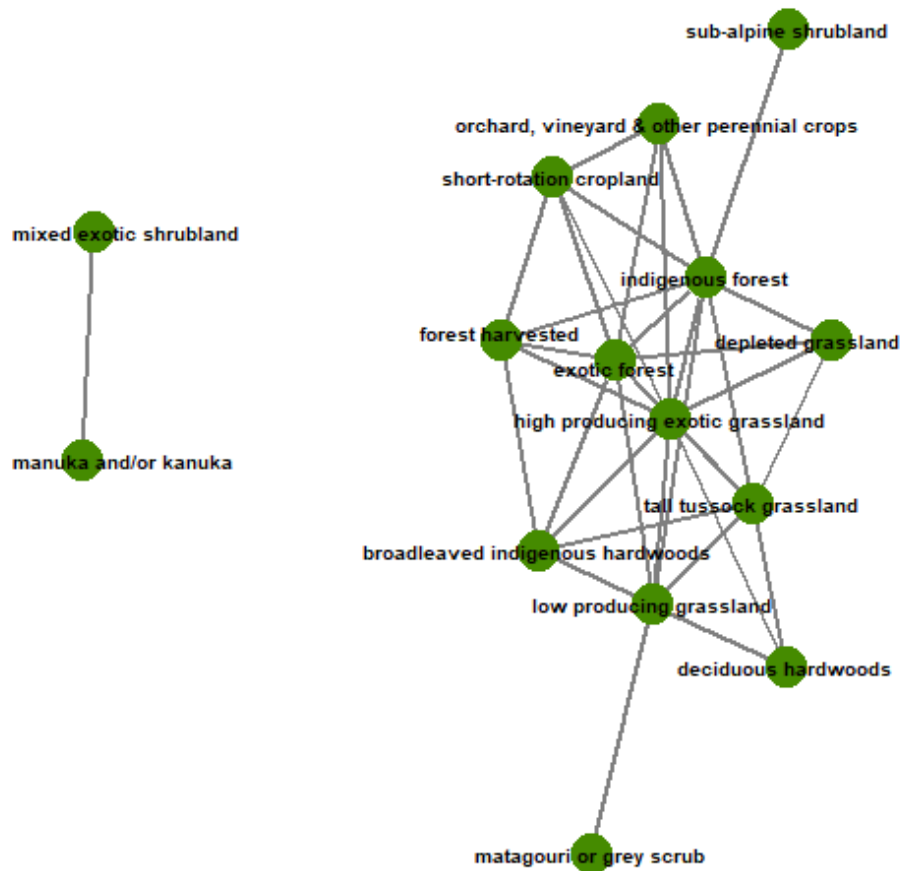

564

565 **Fig. S11.** Land-cover comparison networks for habitat provision.

566

567 **Evidence base:** As shown in Fig. S11, there are two networks connecting the land cover  
568 comparisons for this service. The smaller of these networks encompasses the mixed exotic  
569 shrublands and manuka/kanuka (which are compared only in one study for this service),  
570 while the remaining land covers are connected in the larger network. Evidence for the  
571 smaller network suggests manuka and/or kanuka is marginally better than mixed exotic  
572 shrubland in the provision of habitat (with a log response ratio of approximately 0.025 for  
573 manuka and/or kanuka over the mixed exotic shrubland, and a standard error of  
574 approximately 0.079 in this estimate). Below we present the evidence base and network  
575 meta-analysis for the larger network of land covers in this service.

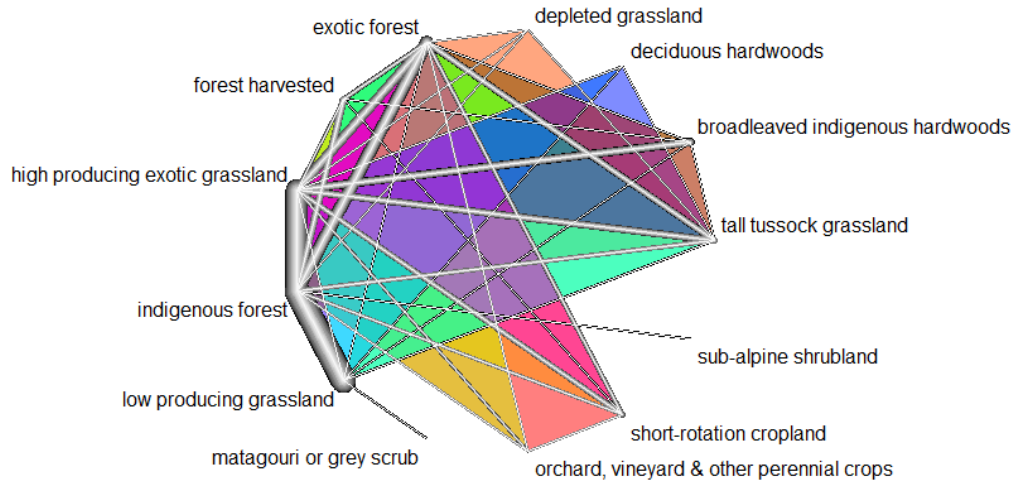

576

577 **Fig. S12.** Evidence network for land cover comparisons on habitat provision.

578 This evidence network is formed by 122 pairwise comparisons of 13 land covers. Data  
579 were obtained from 49 different studies, each contributing a minimum of one and a  
580 maximum of four pairwise land cover comparisons. As indicated by the thicker lines in Fig.  
581 S12, the land covers that are most commonly compared are:

- 582 • High producing exotic grassland (61 comparisons)
- 583 • Indigenous forest (51 comparisons)
- 584 • Exotic forest (49 comparisons)
- 585 • Tall tussock grassland (17 comparisons)

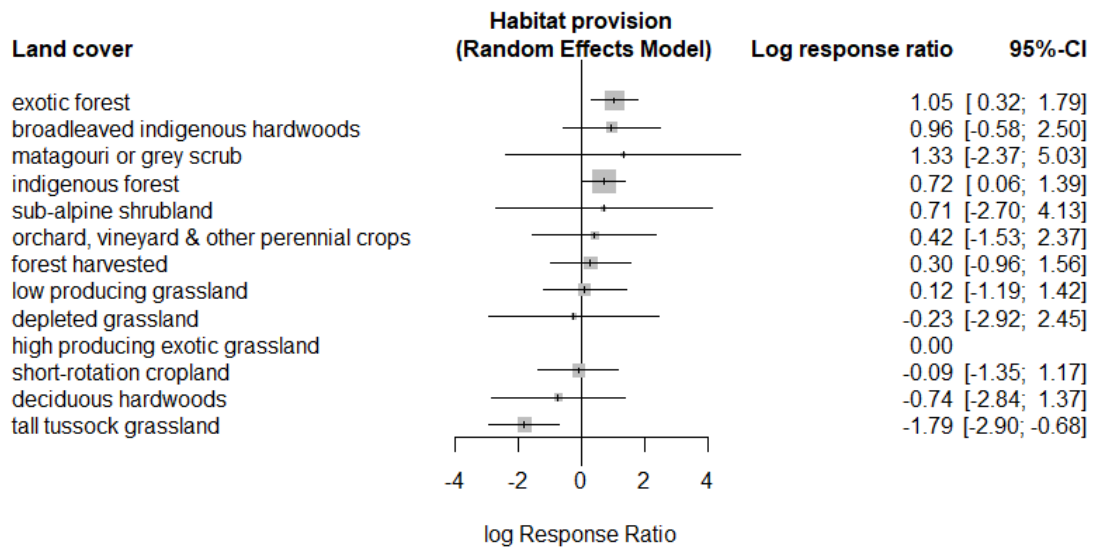

586

587 **Fig. S13.** Forest plot of land cover contrasts in habitat provision. Random effects model with  
 588 high producing exotic grassland as a reference.

589

590 **Measures of heterogeneity/network inconsistency:**

591  $\tau^2 = 1.699$

592  $I^2 = 99.552$

593 **Main results:**

- 594 • Exotic and native forests are both significantly better than high producing exotic  
 595 grassland in providing habitat and, although non-significant, the exotic forest ranks  
 596 slightly higher than the native one in delivering this service.
- 597 • Tall tussock grasslands rank poorly and are significantly worse than both exotic and  
 598 native forests and high producing exotic grasslands in the provision of habitat.
- 599 • All croplands and grasslands (low, high and depleted) perform similarly in the  
 600 provision of this service and, overall, rank below the forest and native shrublands.

601

602 *Soil formation*

603 **Type of indicators for this ecosystem service:** Comparisons for this ecosystem service  
604 were drawn from 111 different indicators that cover aspects such as: soil aggradation and  
605 degradation processes (the latter having a negative effect on soil formation), soil structure  
606 and stability, the availability of nutrients and favorable conditions for plant growth in the  
607 soil.

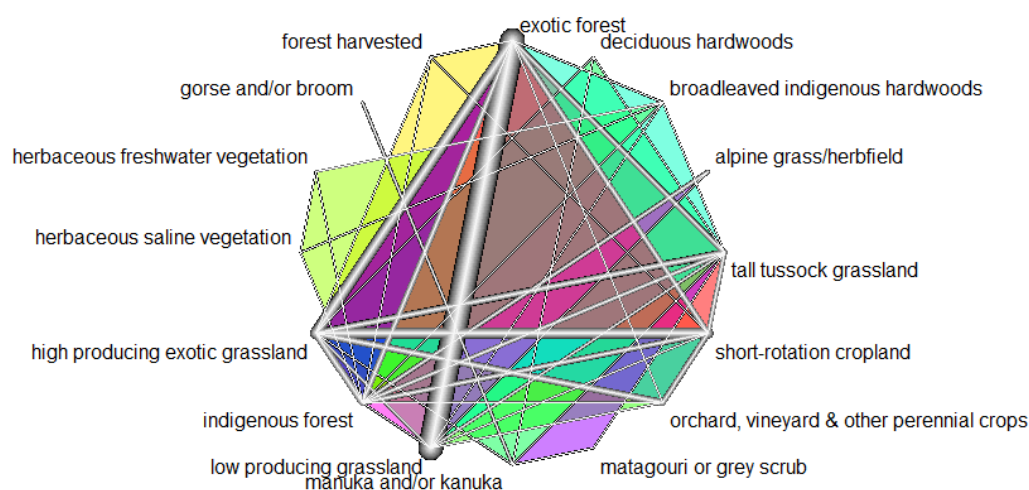

608

609 **Fig. S14.** Evidence network for land cover comparisons on soil formation.

610

611 **Evidence base:** This evidence network is formed by 110 pairwise comparisons of 16 land  
612 covers. Data were obtained from 51 different studies, each contributing a minimum of one  
613 and a maximum of four pairwise land cover comparisons. As indicated by the thicker lines  
614 in Fig. S14, the land covers that are most commonly compared are:

- 615 • High producing exotic grassland (54 comparisons)
- 616 • Exotic forest (42 comparisons)

- 617 • Short-rotation cropland (30 comparisons)
- 618 • Indigenous forest (25 comparisons)

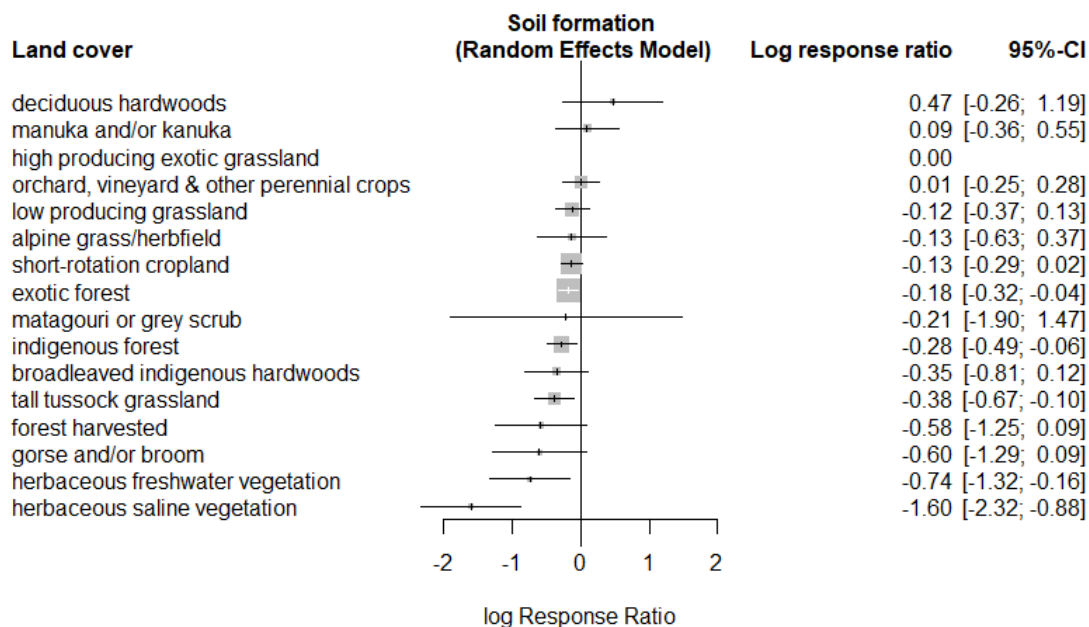

619

620 **Fig. S15.** Forest plot of land cover contrasts in the provision of soil formation. Random effects  
 621 model with high producing exotic grassland as a reference.

622

623 **Measures of heterogeneity/network inconsistency:**

624  $\tau^2 = 0.241$

625  $I^2 = 67.163$

626 **Main results:**

- 627 • No land cover is significantly better than the high producing exotic grassland in  
 628 promoting soil formation however, the ratio estimate for deciduous hardwoods does  
 629 place them a bit above the reference in the provision of this service.
- 630 • High producing exotic grasslands rank well in this service, this is likely a result of both  
 631 the high artificial nutrient inputs (that result in a greater nutrient availability for  
 632 plants and, by our accounting, increased soil formation) and the fact that this land

633 cover tends to be found in areas where the soils are well developed and very favorable  
634 to plant growth. The small (and insignificant) differences between high producing  
635 exotic grassland and both cropland covers (short rotation and the orchard, vineyard &  
636 other perennial crops) could be explained by similar factors.

- 637 • Except for manuka and/or kanuka, all native land covers rank similarly in the  
638 provision of this service. Indigenous forests and tall tussock grasslands are  
639 significantly worse than the reference land cover, while broadleaved indigenous  
640 hardwoods and matagouri also do worse than the reference but not significantly so.
- 641 • Gorse and/or broom and forest harvested also rank below the reference land cover in  
642 delivering this service, but their wide confidence intervals make these differences  
643 statistically non-significant. Wide confidence intervals also apply to herbaceous  
644 freshwater and saline vegetation which, nevertheless, still perform significantly worse  
645 than the reference and many of the other land covers. This makes sense given how  
646 they are prone to influxes of water that prevent soil forming processes.

647

#### 648 *Freshwater provision*

649 **Type of indicators for this ecosystem service:** Comparisons for this ecosystem service  
650 were drawn from 71 indicators all of which expressed a measure of land cover effects on  
651 the quantity or quality of freshwater provided by streams. Indicators on the quality of  
652 water draw mostly on measures from concentrations of nutrients commonly linked to  
653 eutrophication (namely nitrogen and phosphorus), sediments and fecal contamination.

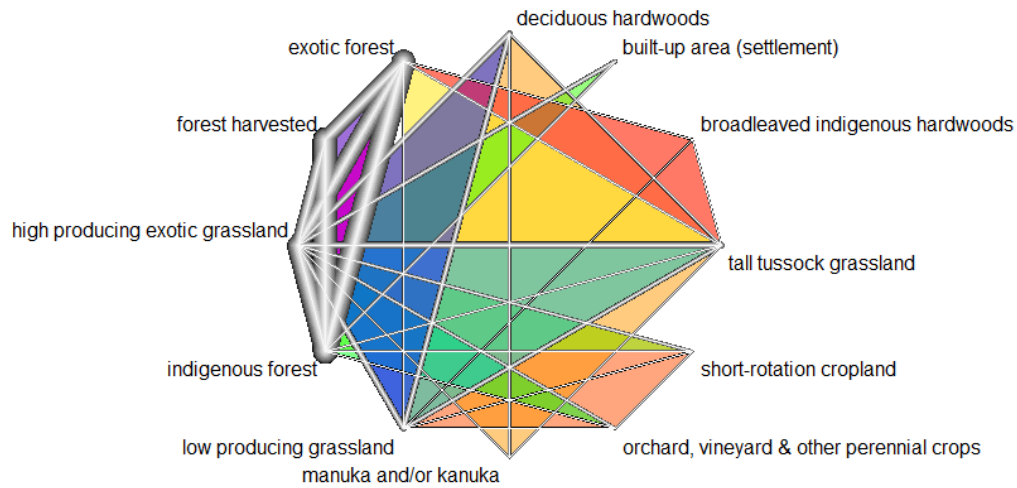

654

655 **Fig. S16.** Evidence network for land cover comparisons on freshwater provision.

656

657 **Evidence base:** This evidence network is formed by 96 pairwise comparisons of 12 land  
658 covers. Data were obtained from 44 different studies, each contributing a minimum of one  
659 and a maximum of three pairwise land cover comparisons. As indicated by the thicker lines  
660 in Fig. S16, the land covers that are most commonly compared are:

- 661 • High producing exotic grassland (52 comparisons)
- 662 • Indigenous forest (40 comparisons)
- 663 • Exotic forest (35 comparisons)
- 664 • Tall tussock grassland (16 comparisons)



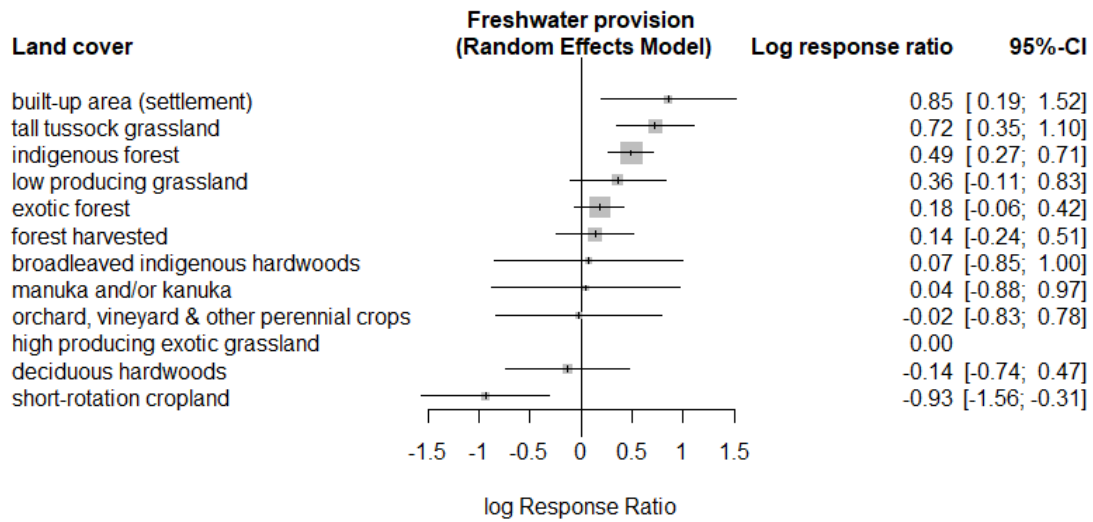

665

666 **Fig. S17.** Forest plot of land cover contrasts on freshwater provision. Random effects model  
 667 with high producing exotic grassland as a reference.

668

669 **Measures of heterogeneity/network inconsistency:**

670  $\tau^2 = 0.423$

671  $I^2 = 81.514$

672 **Main results:**

- 673 • It is striking to find built-up area as the highest ranking land cover in providing this  
 674 service. However the log response estimate is bounded by wide confidence intervals.  
 675 For this specific land cover we only had information on how it compares to high  
 676 producing exotic grassland in terms of specific stream flow, where it exceeds the  
 677 grassland by 4 times. So the effect we see here could be an artifact of this single data  
 678 point.
- 679 • Tussock grasslands and indigenous forests both perform significantly better than the  
 680 high producing exotic grassland in providing freshwater. While low producing  
 681 grasslands also tended to do better than the reference but not significantly so.

- 682 • Exotic and harvested forests have very similar rankings, performing slightly better  
683 than the reference but not in a significant way. Likewise, the deciduous hardwoods,  
684 tend to do worse than the reference in providing freshwater but the difference is not  
685 significant.
- 686 • Short-rotation cropland performs poorly in the provision of this service and has  
687 significant differences not only with the reference land cover, but also with some of  
688 the ones that rank high in its provision (built-up area, tall tussock and low producing  
689 grasslands, exotic, harvested and indigenous forests).
- 690 • For the remainder of the land covers, the confidence intervals are wide and intersect  
691 those of all the other land covers.

692

693 *Water purification*

694 **Type of indicators for this ecosystem service:** Comparisons for this ecosystem service  
695 were drawn from 78 indicators that provide a measure of either: the filtering of pollutants  
696 and excess nutrients from the water (either in the soil or in aquatic systems, for processes  
697 that are affected by land cover), or the accumulation of pollutants and toxic substances in  
698 freshwater.

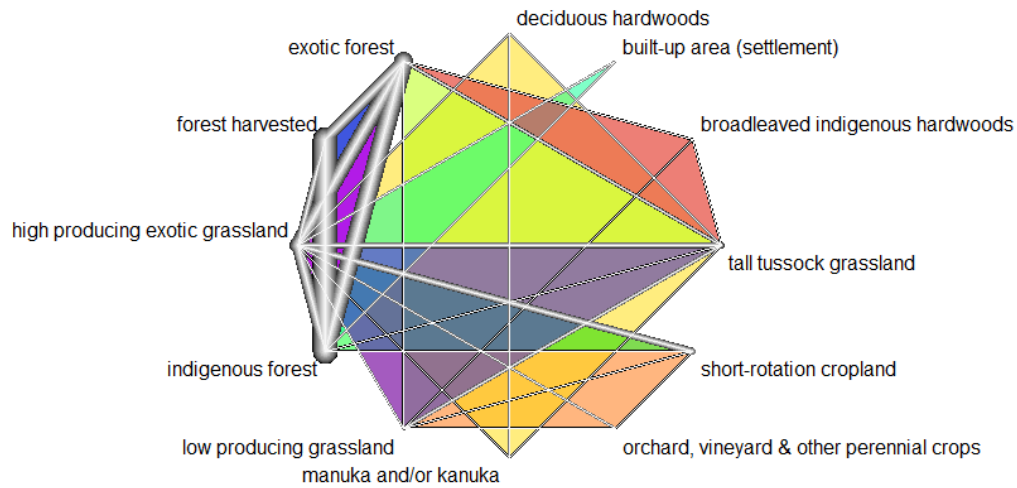

699

700 **Fig. S18.** Evidence network for land cover comparisons on water purification.

701

702 **Evidence base:** This evidence network is formed by 80 pairwise comparisons of 12 land  
703 covers. Data were obtained from 40 different studies, each contributing a minimum of one  
704 and a maximum of three pairwise land cover comparisons. As indicated by the thicker lines  
705 in Fig. S18, the land covers that are most commonly compared are:

- 706
- 707 • High producing exotic grassland (41 comparisons)
  - 708 • Indigenous forest (32 comparisons)
  - 709 • Exotic forest (28 comparisons)
  - Tall tussock grassland (16 comparisons)

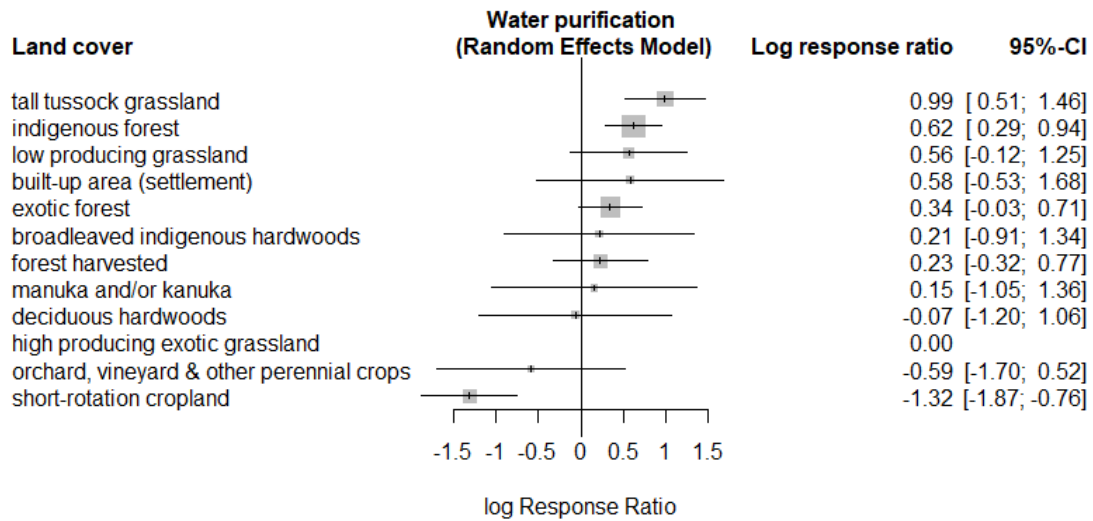

710

711 **Fig. S19.** Forest plot of land cover contrasts in the provision of water purification. Random  
 712 effects model with high producing exotic grassland as a reference.

713

714 **Measures of heterogeneity/network inconsistency:**

715  $\tau^2 = 0.588$

716  $I^2 = 90.579$

717 **Main results:**

- 718 • Both tall tussock grasslands and indigenous forests stand out as land covers that do  
 719 significantly better than the reference in the provision of this service, and overall, rank  
 720 above all other land covers. Exotic and harvested forests also tend to perform slightly  
 721 better the reference land cover in this service, although not significantly so.
- 722 • Croplands & high producing grasslands rank poorly, with short rotation croplands  
 723 performing significantly worse than many of the land covers, including the high  
 724 producing grasslands.
- 725 • Broadleaved indigenous hardwoods, manuka and/or kanuka, deciduous hardwoods  
 726 and orchard, vineyard & other perennial crops all have wide confidence intervals and,  
 727 as a result, are not significantly different from the other land covers.

- 728 • The relatively high ranking estimate for built areas is quite surprising here. However,  
729 the estimate is bounded by large confidence intervals and supported by direct  
730 comparisons with only two other land covers (high producing exotic grassland and  
731 indigenous forest), both of which stem from a single study.

732

733 *Global climate regulation*

734 **Type of indicators for this ecosystem service:** Comparisons for this ecosystem service  
735 were drawn from 29 indicators most of which are based on measures of greenhouse gas  
736 emission and sequestration processes in the soil. The majority of the indicators focus on  
737 carbon dioxide however, the data also include a few on methane and nitrous oxide.

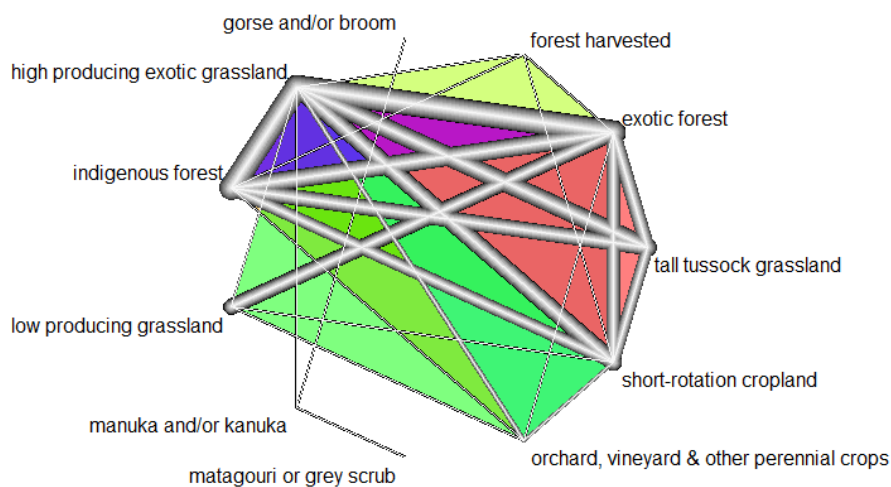

738

739 **Fig. S20.** Evidence network for land cover comparisons on global climate regulation.

740

741 **Evidence base:** This evidence network is formed by 75 pairwise comparisons of 11 land  
742 covers. Data were obtained from 33 different studies, each contributing a minimum of one

743 and a maximum of four pairwise land cover comparisons. As indicated by the thicker lines  
 744 in Fig. S20, the land covers that are most commonly compared are:

- 745 • High producing exotic grassland (45 comparisons)
- 746 • Exotic forest (34 comparisons)
- 747 • Short-rotation cropland (25 comparisons)
- 748 • Indigenous forest (19 comparisons)

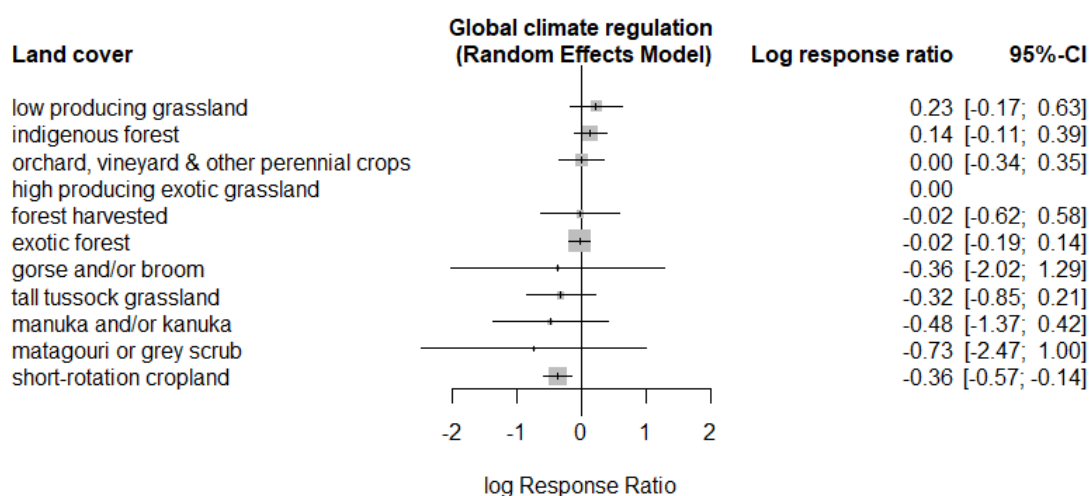

749

750 **Fig. S21.** Forest plot of land cover contrasts in the provision of global climate regulation.  
 751 Random effects model with high producing exotic grassland as a reference.

752

753 **Measures of heterogeneity/network inconsistency:**

754  $\tau^2 = 0.335$

755  $I^2 = 94.585$

756 **Main results:**

- 757 • There are no significant differences between the high producing exotic grassland  
 758 reference and all other land covers, except for short-rotation croplands which  
 759 performs significantly worse than the reference and indigenous forest in delivering  
 760 this service. The fact that short-rotation cropland does worse than the high producing

761 grassland, and that the latter is not significantly different from the native land covers  
762 could, in part, be explained by the selection of indicators available for this service  
763 (which focus mainly on processes at the soil level instead of the entire land system  
764 which would include the effects of livestock).

765

766 *Primary production*

767 **Type of indicators for this ecosystem service:** Comparisons for this ecosystem service  
768 were drawn from 23 indicators. The larger proportion of these indicators express primary  
769 productivity as the amount of biomass within a given land cover, however there are also  
770 some indicators on the effects land covers have over primary productivity in streams (e.g.,  
771 by providing more or less shade cover).

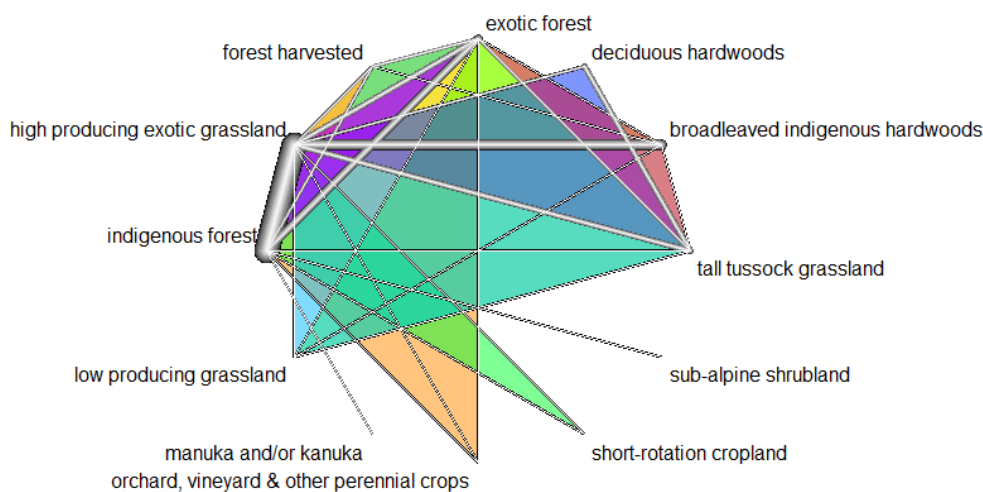

772

773 **Fig. S22.** Evidence network for land cover comparisons on primary production.

774

775 **Evidence base:** This evidence network is formed by 66 pairwise comparisons of 12 land  
 776 covers. Data were obtained from 32 different studies, each contributing a minimum of one  
 777 and a maximum of three pairwise land cover comparisons. As indicated by the thicker lines  
 778 in Fig. S22, the land covers that are most commonly compared are:

- 779 • High producing exotic grassland (33 comparisons)
- 780 • Indigenous forest (27 comparisons)
- 781 • Exotic forest (25 comparisons)
- 782 • Tall tussock grassland (14 comparisons)

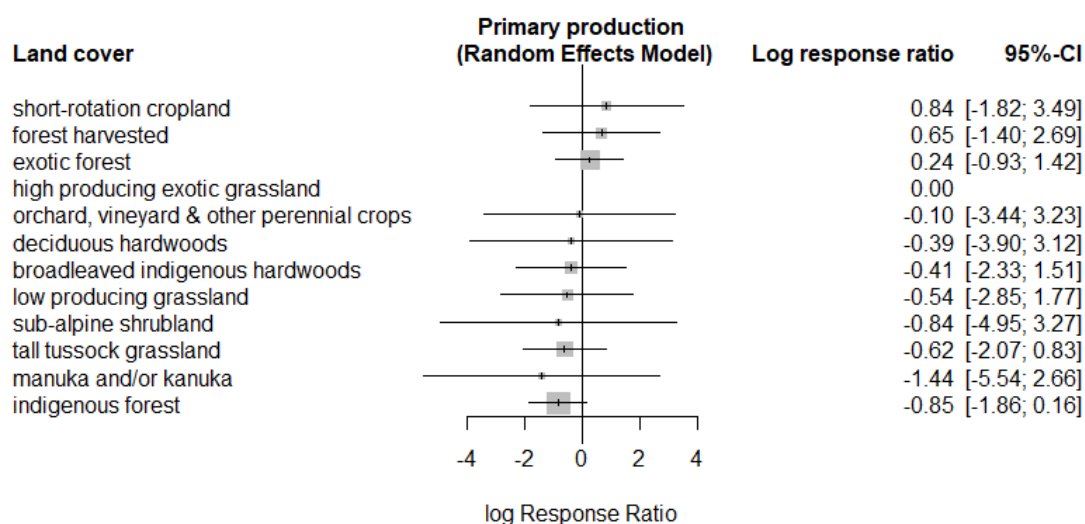

783  
 784 **Fig. S23.** Forest plot of land cover contrasts in the provision of primary production. Random  
 785 effects model with high producing exotic grassland as a reference.

786  
 787 **Measures of heterogeneity/network inconsistency:**

788  $\tau^2 = 2.021$

789  $I^2 = 99.602$

790 **Main results:**

- 791 • All of the land cover effect estimates for this service have wide confidence intervals  
 792 that overlap each other and intersect the reference mark for the high producing exotic



793 grassland. However, the production land covers (exotic and harvested forests,  
794 croplands, deciduous hardwoods and high producing exotic grasslands) tend to be  
795 better at delivering this service than the native ones (broadleaved indigenous  
796 hardwoods, tall tussock grassland, sub-alpine shrubland, manuka and/or kanuka and  
797 indigenous forest). This is likely due to the high biomass turnover found in production  
798 systems and reflected in the measures of biomass accumulation we have for this  
799 service. Under the LCDB definition, forest harvested includes areas where native and  
800 exotic forests have been cleared and within those, areas where the forest has been  
801 replanted and is up to 5 years old. The fast growth rate of young forests could thus  
802 account for the high rank of this land cover in the provision of primary production.

803

#### 804 *Water cycling*

805 **Type of indicators for this ecosystem service:** Comparisons for this ecosystem service  
806 were drawn from 16 indicators, all of which quantify the amount of water flowing through  
807 the different components of the terrestrial segment of the cycle. For this service we defined  
808 a positive relationship between all measures of water flow and the provision of the service,  
809 such that the greater the flow at a given land cover, the larger the contribution of that land  
810 cover to the provision of the service. This follows the MEA definition of water cycling as a  
811 supporting service that benefits all living organisms by allowing the movement of water  
812 through ecosystems (9).

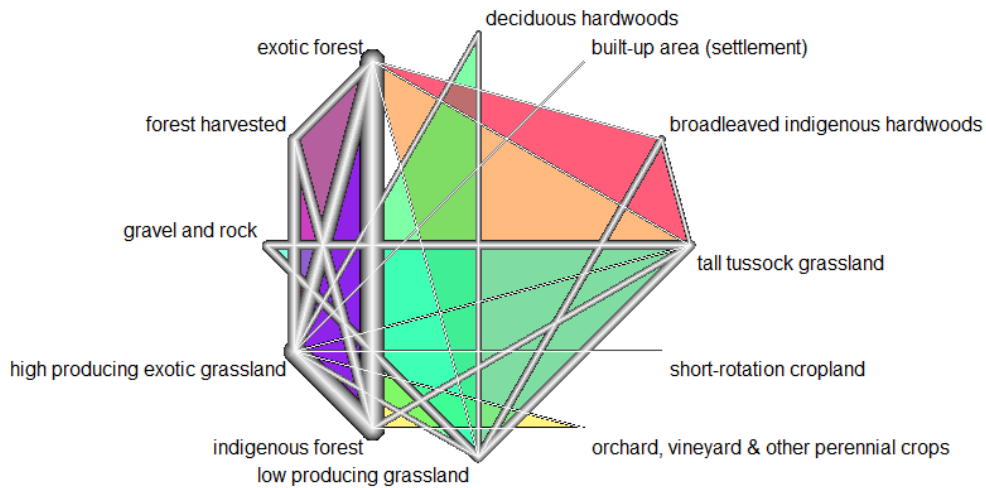

813

814 **Fig. S24.** Evidence network for land cover comparisons on water cycling.

815

816 **Evidence base:** This evidence network is formed by 61 pairwise comparisons of 12 land  
817 covers. Data were obtained from 29 different studies, each contributing a minimum of one  
818 and a maximum of three pairwise land cover comparisons. As indicated by the thicker lines  
819 in Fig. S24, the land covers that are most commonly compared are:

- 820
- High producing exotic grassland (31 comparisons)

821

  - Exotic forest (26 comparisons)

822

  - Indigenous forest (25 comparisons)

823

  - Tall tussock grassland (10 comparisons)

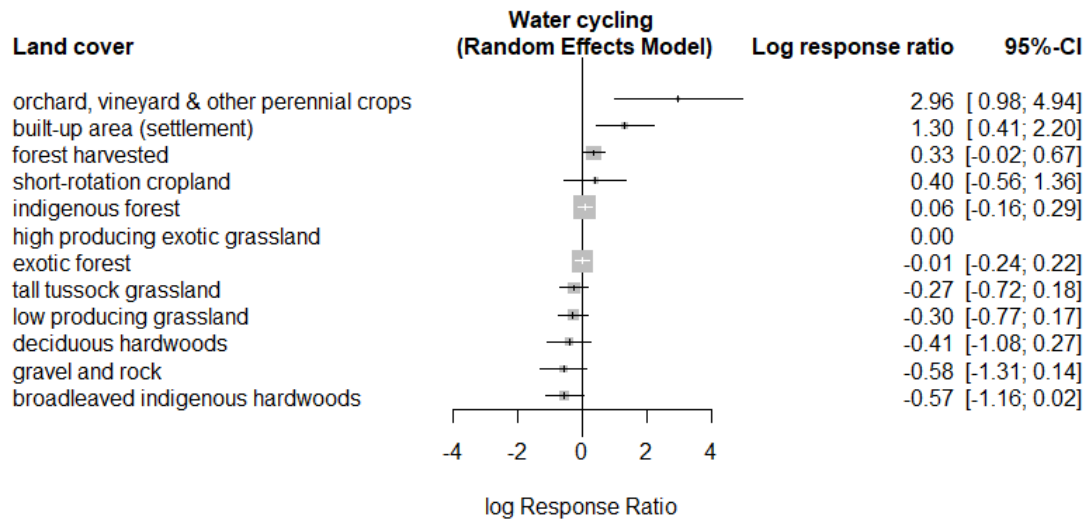

824

825 **Fig. S25.** Forest plot of land cover contrasts in the provision of water cycling. Random effects  
 826 model with high producing exotic grassland as a reference.

827

828 **Measures of heterogeneity/network inconsistency:**

829  $\tau^2 = 0.332$

830  $I^2 = 77.458$

831 **Main results:**

- 832 • Built-up area and orchard, vineyard & other perennial crops stand out as land covers  
 833 that do very well in providing this service. Their effect estimates stand out as  
 834 significantly better than the high producing exotic grassland reference and most of the  
 835 other land covers (except harvested forest and short-rotation cropland). For built-up  
 836 (settlement) areas this could be an effect of increased flow speeds due to the presence  
 837 of impervious surfaces.
- 838 • Systems that have slower water cycles (native and exotic forests, broadleaved  
 839 indigenous hardwoods, tall tussock and low producing grasslands) tend to rank worse  
 840 in this service than they do in the regulation of water timing and flows, suggesting a  
 841 trade-off between water cycling and the regulation of flows. However, gravel and rock,

842 which would be a system with faster cycling rates, also follows this trend. This could  
843 be driven by the direct evidence we have for gravel and rock under water cycling  
844 which involves water yield comparisons to tall tussock and low producing grasslands,  
845 and in which gravel and rock always performs worse (given its high infiltration  
846 capacity). In contrast, all other land covers with faster cycling rates (orchard, vineyard  
847 and other perennials, high producing exotic grassland and short-rotation cropland)  
848 are better at water cycling than they are at the timing and regulation of flows.

849

#### 850 *Erosion control*

851 **Type of indicators for this ecosystem service:** Comparisons for this ecosystem service  
852 were drawn from 25 indicators on the magnitude of soil loss and sediment export to  
853 waterways as well as soil and stream channel characteristics that provide increased  
854 resistance to erosion.

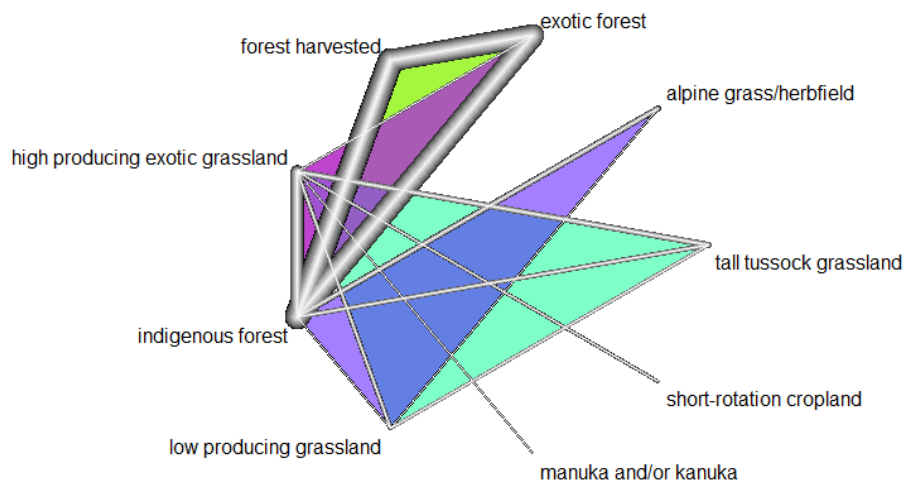

855

856 **Fig. S26.** Evidence network for land cover comparisons on erosion control.

857

858 **Evidence base:** This evidence network is formed by 36 pairwise comparisons of nine land  
 859 covers. Data were obtained from 22 different studies, each contributing one to two  
 860 pairwise land cover comparisons. As indicated by the thicker lines in Fig. S26, the land  
 861 covers that are most commonly compared are:

- 862 • High producing exotic grassland (19 comparisons)
- 863 • Indigenous forest (19 comparisons)
- 864 • Exotic forest (12 comparisons)
- 865 • Forest harvested (five comparisons)

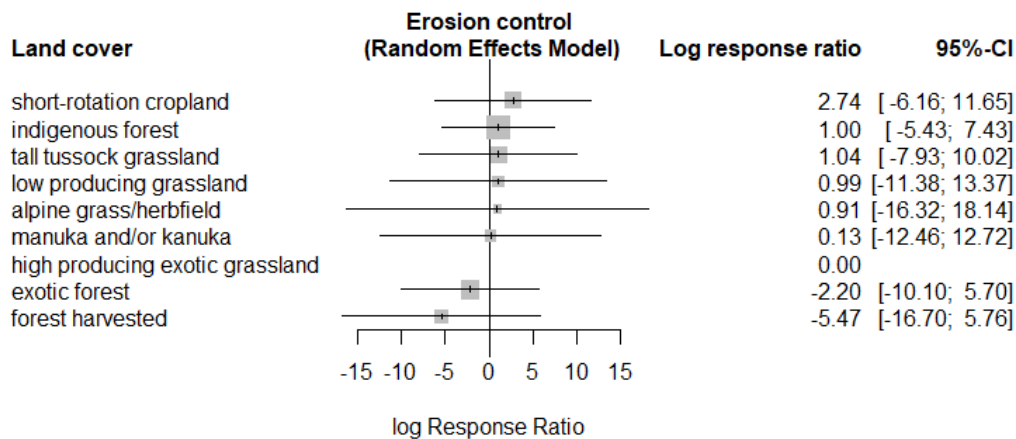

866

867 **Fig. S27.** Forest plot of land cover contrasts in the provision of erosion control. Random  
 868 effects model with high producing exotic grassland as a reference.

869

870 **Measures of heterogeneity/network inconsistency:**

871  $\tau^2 = 9.08$

872  $I^2 = 99.967$

873 **Main results:**

- 874 • Effect estimates are all bounded by wide confidence intervals, which yield no  
 875 significant differences between any of the land covers. This could be due to the effect

876 of environmental variables such as slope and parent material of the soil which  
877 introduce additional variation within each land cover.

878 • Except for short-rotation cropland, the production land covers tend to perform poorly  
879 in the provision of this service. In contrast, those with native vegetation covers (in the  
880 form of grass, forest or shrublands) have higher ranking estimates for their control  
881 over erosive processes.

882

883 *Pest regulation*

884 **Type of indicators for this ecosystem service:** Comparisons for this ecosystem service  
885 were drawn from 44 indicators, most of which focus on the abundance of invasive species  
886 in different land covers. However, there are also some indicators that quantify habitat  
887 occupation and use by invader species, and their response to biological controls.

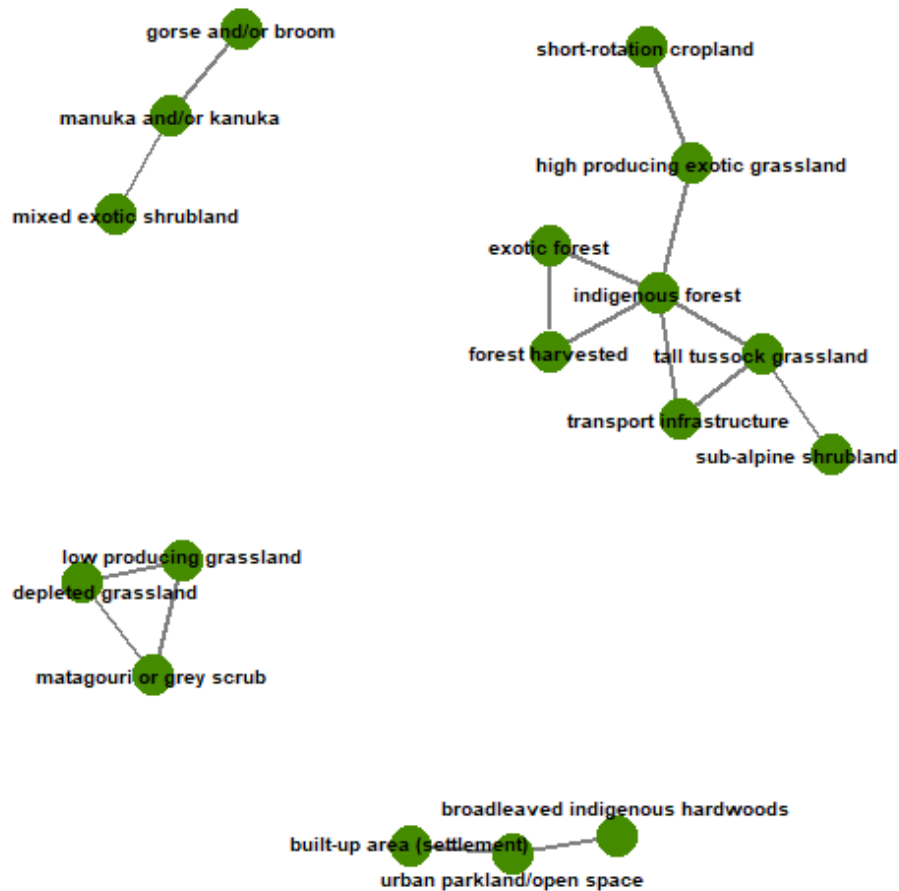

888

889 **Fig. S28.** Land-cover comparison networks for pest regulation.

890

891 **Evidence base:** As shown in Fig. S28, there are four networks connecting the land cover  
892 comparisons for this service: three smaller ones and a larger one. The evidence for the  
893 smaller networks is summarized in **Table S6**, whereas the remainder of this section  
894 describes the data and analysis for the larger network of land covers in this service.

895 **Table S6.** Reported response ratios for evidence subnetworks in pest regulation. Ratios are  
896 based on the natural logarithm of the quotient of land cover 1 over land cover 2

| Sub-network | Land Cover 1                     | Land Cover 2              | Log Response Ratio | Standard Error | Study ID |
|-------------|----------------------------------|---------------------------|--------------------|----------------|----------|
| 1           | broadleaved indigenous hardwoods | urban parkland/open space | -0.045             | 0.206          | S14626   |
| 1           | built-up area (settlement)       | urban parkland/open space | 8.760              | 0.126          | S16437   |
| 2           | gorse and/or broom               | manuka and/or kanuka      | -0.572             | 0.304          | S14266   |
| 2           | manuka and/or kanuka             | mixed exotic shrubland    | 0.117              | 0.065          | S18250   |
| 3           | depleted grassland               | low producing grassland   | 0.105              | 0.593          | S13628   |
| 3           | depleted grassland               | matagouri or grey scrub   | 0.063              | 0.550          | S13628   |
| 3           | low producing grassland          | matagouri or grey scrub   | -0.042             | 0.424          | S13628   |



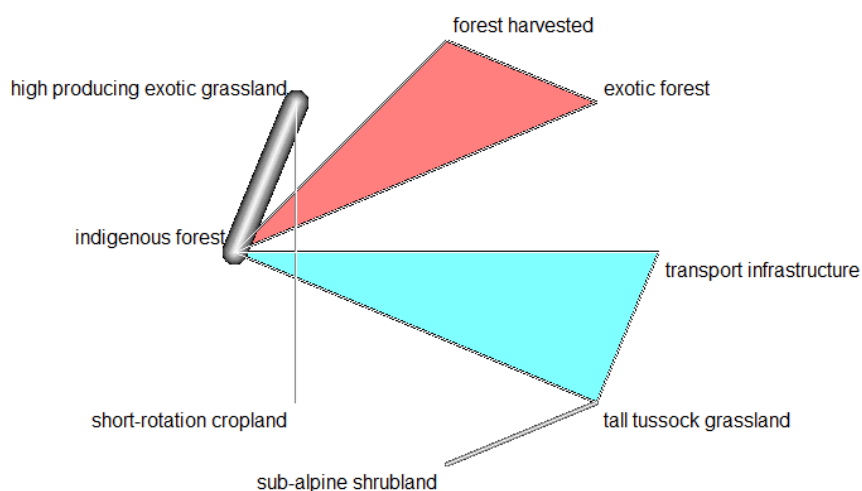

897

898 **Fig. S29.** Evidence network for land cover comparisons on pest regulation.

899 The largest evidence network for pest regulation is formed by 11 pairwise comparisons of  
900 eight land covers. Data were obtained from seven different studies, each contributing a  
901 minimum of one and a maximum of two pairwise land cover comparisons. As indicated by  
902 the thicker lines in Fig. S29, the land covers that are most commonly compared are:

- 903 • Indigenous forest (seven comparisons)
- 904 • Tall tussock grassland (three comparisons)
- 905 • Forest harvested (three comparisons)
- 906 • Exotic forest (three comparisons)

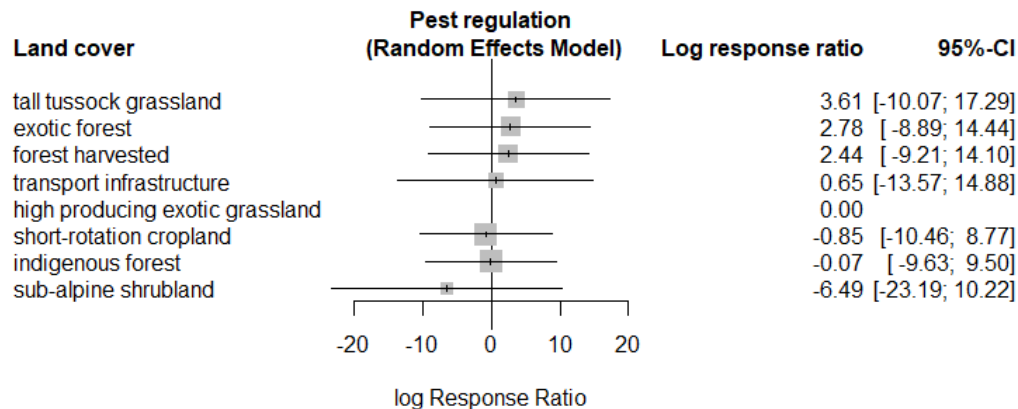

907

908 **Fig. S30.** Forest plot of land cover contrasts in the provision of pest regulation. Random  
 909 effects model with high producing exotic grassland as a reference.

910

911 **Measures of heterogeneity/network inconsistency:**

912  $\tau^2 = 4.88$

913  $I^2 = 96.012$

914 **Main results:**

- 915 • Effect estimates are all bounded by wide confidence intervals which yield no  
 916 significant differences between the ratio estimates for any of the land covers. This  
 917 could be explained by the fact that the evidence network has many comparisons  
 918 converging around indigenous forest (Fig. S29) and that five out of the seven studies in  
 919 this service provide evidence only on a single pair of land covers.
- 920 • In relation solely to the log Response Ratio estimates, tall tussock grasslands and  
 921 exotic forests (harvested and unharvested) have the highest estimates, ranking above  
 922 the high producing grassland reference in the provision of this service. In contrast,  
 923 indigenous forests rank similarly to short-rotation croplands with small differences  
 924 with the reference while the remaining native land cover, sub-alpine shrubland,  
 925 performs worse than all other land covers in this service.

926

927 *Waste treatment*

928 **Type of indicators for this ecosystem service:** Comparisons for this ecosystem service  
929 were drawn from 21 indicators most of which provide a measure of the concentration and  
930 export of toxic compounds in the soil.

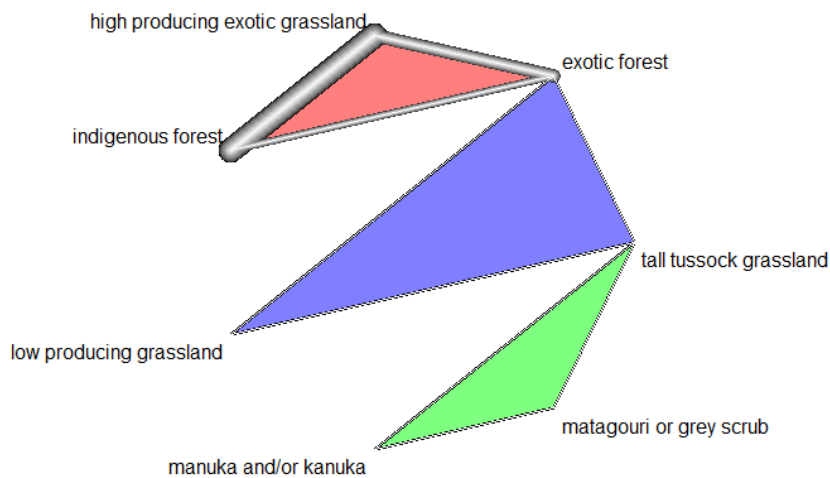

931

932 **Fig. S31.** Evidence network for land cover comparisons on waste treatment.

933

934 **Evidence base:** This evidence network is formed by 13 pairwise comparisons of seven  
935 land covers. Data were obtained from seven different studies, each contributing one to two  
936 pairwise land cover comparisons. As indicated by the thicker lines in Fig. S31, the land  
937 covers that are most commonly compared are:

- 938
- 939 • Exotic forest (seven comparisons)
  - 940 • High producing exotic grassland (six comparisons)
  - 941 • Tall tussock grassland (four comparisons)
  - Indigenous forest (three comparisons)

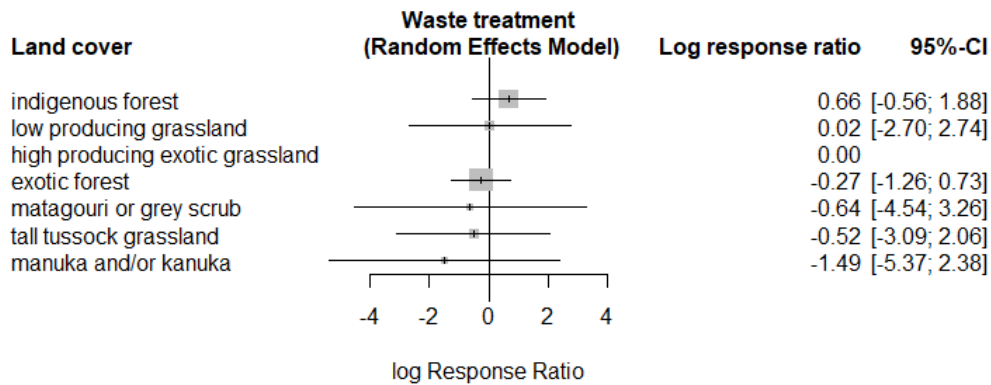

942

943 **Fig. S32.** Forest plot of land cover contrasts in the provision of waste treatment. Random  
 944 effects model with high producing exotic grassland as a reference.

945

946 **Measures of heterogeneity/network inconsistency:**

947  $\tau^2 = 0.911$

948  $I^2 = 94.681$

949 **Main results:**

- 950 • No significant differences can be found between the land covers in this service since  
 951 the confidence intervals all overlap each other and extend over both sides of the  
 952 baseline reference. Furthermore, with the exception of manuka and/or kanuka, the  
 953 estimated log Response Ratio between every land covers and the high producing  
 954 exotic grassland reference is always between one and minus one.
- 955 • Indigenous forest and grassland land covers have rank the highest in the provision of  
 956 this service, while the exotic forest and the remaining native land covers (tall tussocks,  
 957 manuka and/or kanuka, matagouri or grey scrub) all rank poorly an perform  
 958 comparatively worse than the reference land cover.

959

960 *Capture fisheries*

961 **Type of indicators for this ecosystem service:** Comparisons for this ecosystem service  
962 were drawn from 22 indicators on the abundance, biomass, size and growth of freshwater  
963 fish.

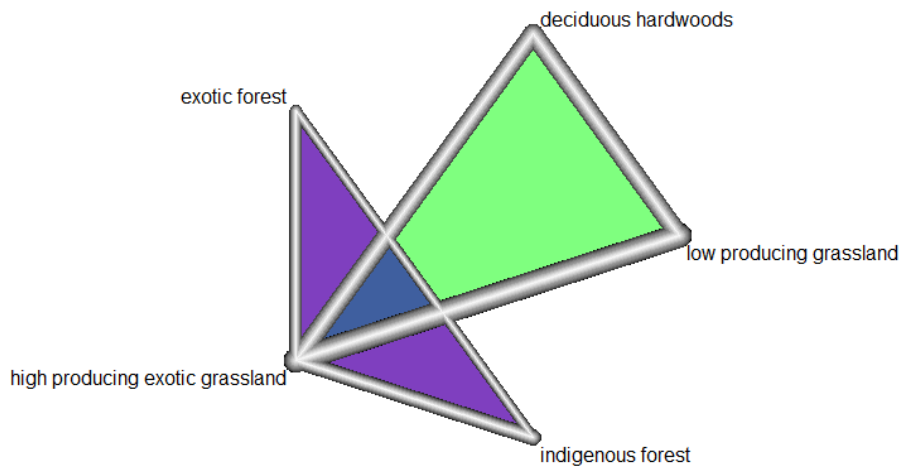

964

965 **Fig. S33.** Evidence network for land cover comparisons on capture fisheries.

966

967 **Evidence base:** This evidence network is formed by 11 pairwise comparisons of five land  
968 covers. Data were obtained from five different studies, each contributing one to two  
969 pairwise land cover comparisons. The land covers that are most commonly compared are:

- 970 • High producing exotic grassland (eight comparisons)
- 971 • Indigenous forest (five comparisons)
- 972 • Exotic forest (four comparisons)
- 973 • Low producing grassland (three comparisons)

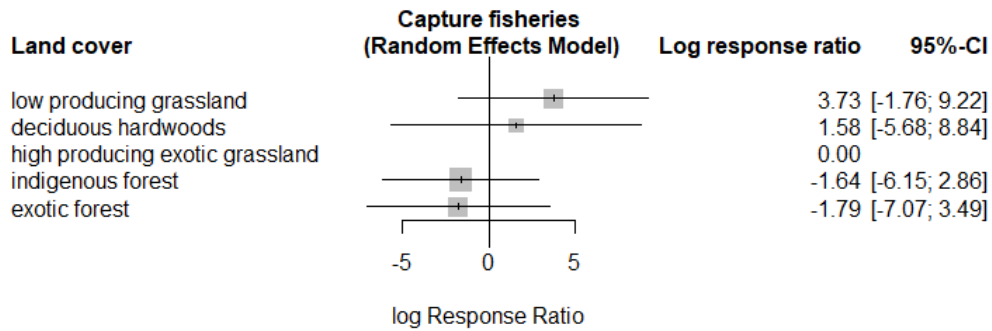

974

975 **Fig. S34.** Forest plot of land cover contrasts in the provision of capture fisheries. Random  
976 effects model with high producing exotic grassland as a reference.

977

978 **Measures of heterogeneity/network inconsistency:**

979  $\tau^2 = 3.955$

980  $I^2 = 99.399$

981 **Main results:**

- 982 • The wide confidence intervals for all land covers preclude any significant differences  
983 between any of the land covers. However, in terms of the ratio estimates, both  
984 indigenous forests tend to deliver less of the capture fisheries service than the low and  
985 high producing grasslands and the deciduous hardwoods.

986

987 *Ethical and spiritual values*

988 **Type of indicators for this ecosystem service:** Comparisons for this ecosystem service  
989 were drawn from 14 indicators, all of which express the abundance, biomass, and growth  
990 of culturally valuable fauna namely, bats and eels. Information for the latter includes most of  
991 the indicators for the capture fisheries service.

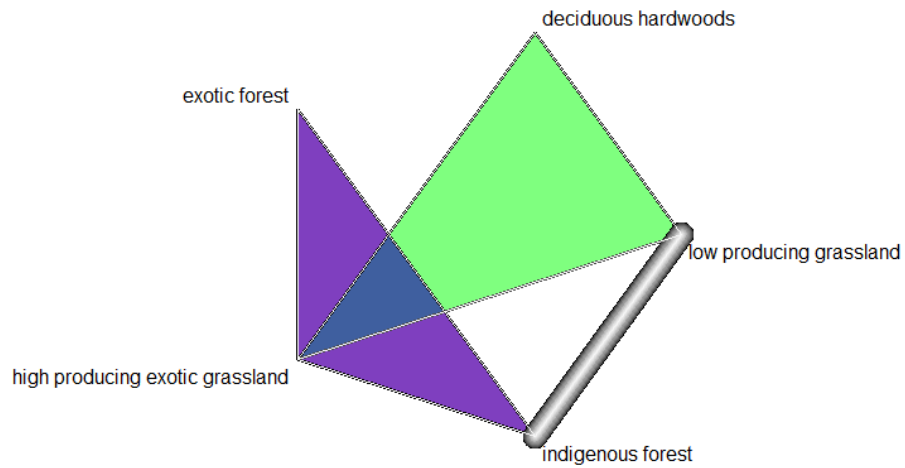

992

993 **Fig. S35.** Evidence network for land cover comparisons on ethical and spiritual values.

994

995 **Evidence base:** This evidence network is formed by 11 pairwise comparisons of five land  
996 covers. Data were obtained from five different studies, each contributing one to two  
997 pairwise land cover comparisons. The land covers that are most commonly compared are:

998 • High producing exotic grassland (seven comparisons)

999 • Indigenous forest (five comparisons)

1000 • Low producing grassland (four comparisons)

1001 • Exotic forest (four comparisons)

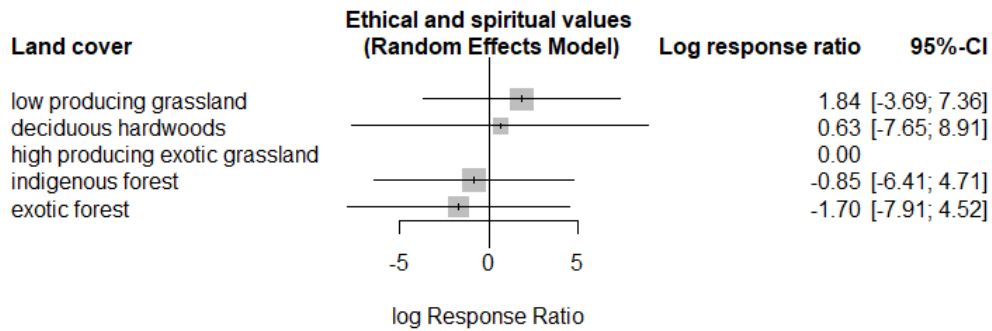

1002

1003 **Fig. S36.** Forest plot of land cover contrasts in the provision of ethical and spiritual values.

1004 Random effects model with high producing exotic grassland as a reference.

1005

1006 **Measures of heterogeneity/network inconsistency:**

1007  $\tau^2 = 4.594$

1008  $I^2 = 99.58$

1009 **Main results:**

- 1010 • Land covers in this service appear to share the same trends as those for the capture
- 1011 fisheries service with wide confidence intervals and the estimated ratios for exotic and
- 1012 native forests at the negative end of the spectrum and being smaller than those for the
- 1013 grasslands and deciduous hardwoods. This is an effect of the large overlap between
- 1014 the indicators that support the evidence on this service and that of capture fisheries.

1015

1016 *Disease mitigation*

1017 **Type of indicators for this ecosystem service:** Comparisons for this ecosystem service

1018 were drawn from nine indicators on the abundance of mosquitoes and their predators, and

1019 on the presence of fecal coliforms, *Escheherichia coli* or entreocoliforms in streams and

1020 freshwater sources.



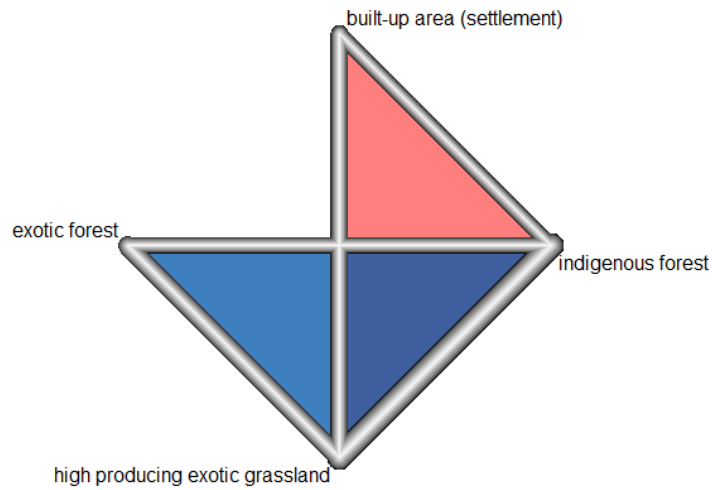

1021

1022 **Fig. S37.** Evidence network for land cover comparisons on disease mitigation.

1023

1024 **Evidence base:** This evidence network is formed by ten pairwise comparisons of four land  
1025 covers. Data were obtained from four different studies, each contributing one to two  
1026 pairwise land cover comparisons. The number of comparisons per land cover is as follows:

- 1027
- Indigenous forest (seven comparisons)
  - 1028 • High producing exotic grassland (seven comparisons)
  - 1029 • Exotic forest (four comparisons)
  - 1030 • Built-up area (settlement) (two comparisons)

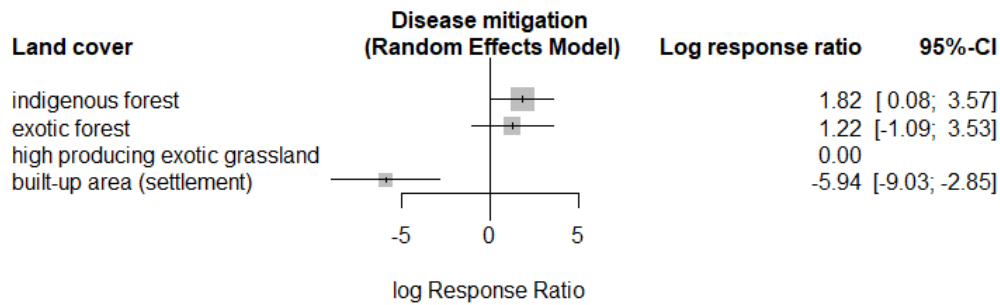

1031

1032 **Fig. S38.** Forest plot of land cover contrasts in the provision of disease mitigation. Random  
1033 effects model with high producing exotic grassland as a reference.

1034

1035 **Measures of heterogeneity/network inconsistency:**

1036  $\tau^2 = 1.729$

1037  $I^2 = 95.505$

1038 **Main results:**

- 1039 • Built-up area stand out as the land cover that performs significantly worse than any of  
1040 the others in delivering this service.
- 1041 • Production land covers (exotic forest and high producing exotic grassland) perform  
1042 slightly worse than the indigenous forest with respect to disease mitigation. The  
1043 difference with the indigenous forest is significant for the high producing exotic  
1044 grasslands but not for the exotic forest.

1045

1046 *Pollination*

1047 **Type of indicators for this ecosystem service:** Comparisons for this ecosystem service  
1048 were drawn from four indicators that quantify the potential for pollination in a land cover  
1049 based on either the abundance or body size of pollinators or on the flower visitation rates  
1050 and duration.

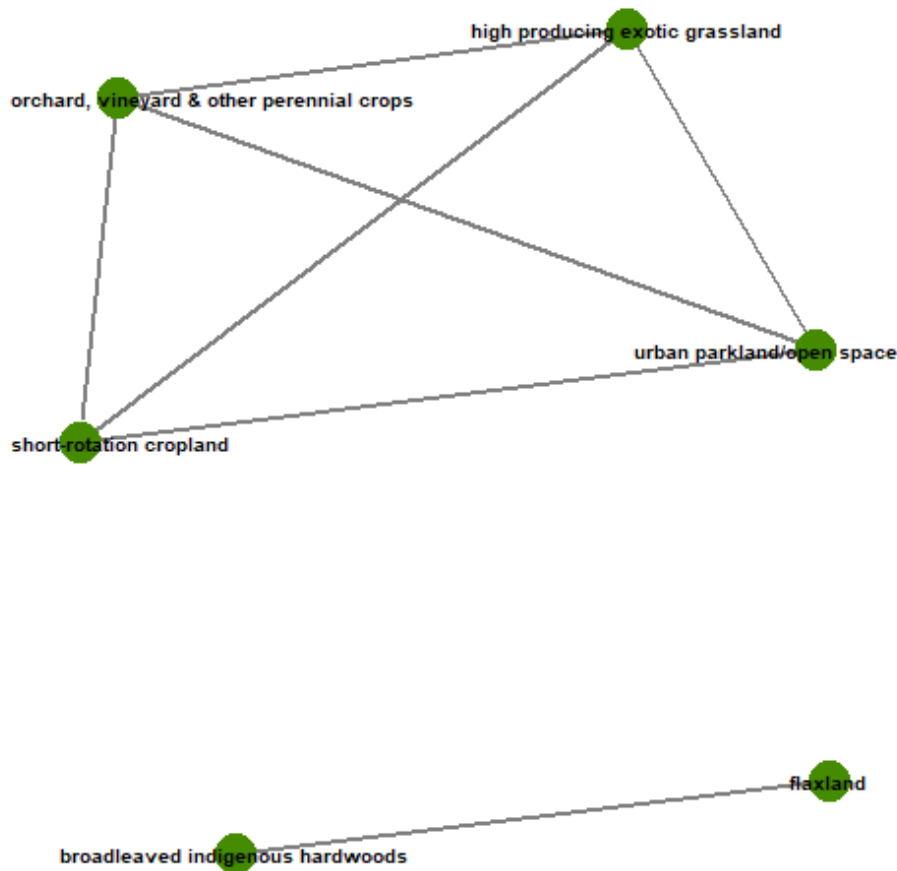

1051

1052 **Fig. S39.** Land-cover comparison networks for pollination.

1053

1054 **Evidence base:** As shown in Fig. S39, the evidence for this service is split into two  
1055 networks: a smaller one connecting broadleaved indigenous hardwoods and flaxland and a  
1056 larger one with the four remaining land covers. For the land covers in the smaller sub-  
1057 network, the evidence available comes from a single study in which the log Response Ratio  
1058 of broadleaved indigenous hardwoods to flaxland is approximately -0.823 and has a  
1059 standard error of 0.625. Details for the larger network are presented below.

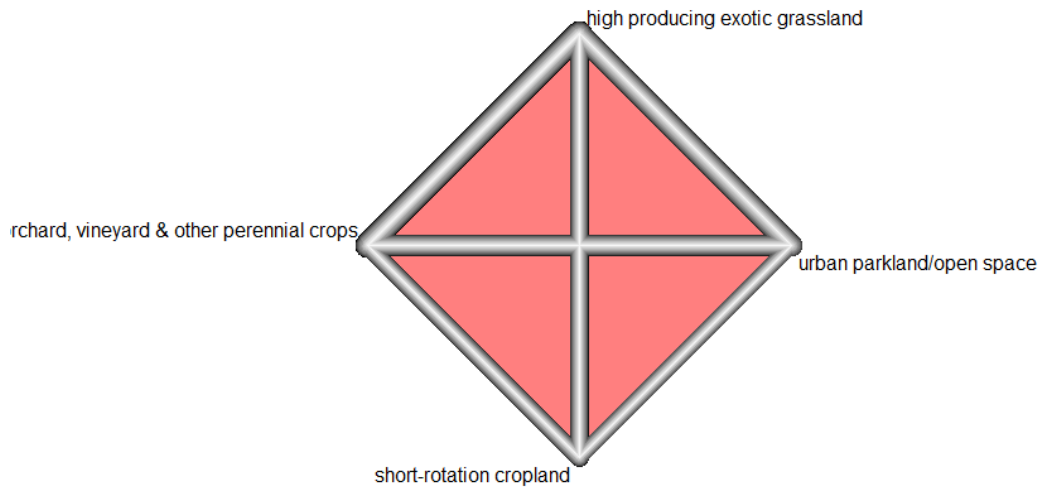

1060

1061 **Fig. S40.** Evidence network for land cover comparisons on pollination.

1062 This evidence network is formed by seven pairwise comparisons of four land covers. Data  
1063 were obtained from two different studies, each contributing a minimum of one and a  
1064 maximum of three pairwise land cover comparisons. As indicated by the thicker lines in  
1065 Fig. S44, the land covers that are most commonly compared are:

- 1066
- Urban parkland/open space (four comparisons)
  - 1067 • High producing exotic grassland (four comparisons)
  - 1068 • Short-rotation cropland (three comparisons)
  - 1069 • Orchard, vineyard & other perennial crops (three comparisons)

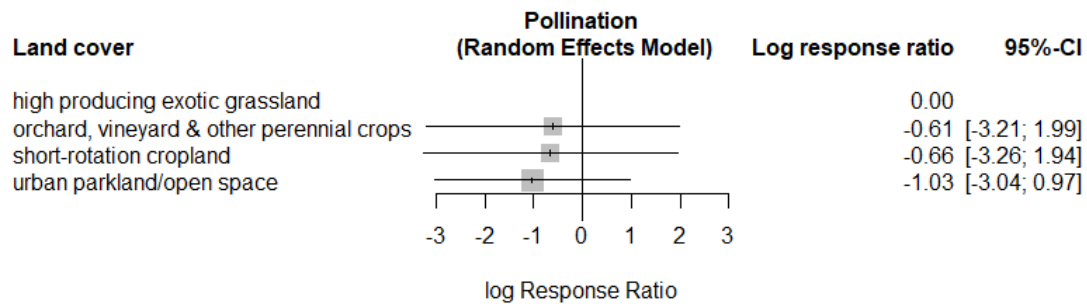

1070

1071 **Fig. S41.** Forest plot of land cover contrasts in the provision of pollination. Random effects  
1072 model with high producing exotic grassland as a reference.

1073

1074 **Measures of heterogeneity/network inconsistency:**

1075  $\tau^2 = 1.412$

1076  $I^2 = 95.049$

1077 **Main results:**

- 1078 • There are no significant differences between the different land covers in the provision  
1079 of this service, since all confidence intervals for the ratio estimates overlap each other  
1080 and extend across the baseline reference. In part this could be a result of having only 2  
1081 studies informing this analysis.
- 1082 • The ratio estimates suggest that the urban parkland/open spaces and, to a lesser  
1083 extent, the croplands perform worse than the high producing exotic grasslands in  
1084 delivering pollination services.

1085

1086 *Regional & local climate regulation*

1087 **Type of indicators for this ecosystem service:** Comparisons for this ecosystem service  
1088 were drawn from three indicators that quantify the regulation of temperatures either in  
1089 stream water or near the land surface (as expressed by evapotranspiration).

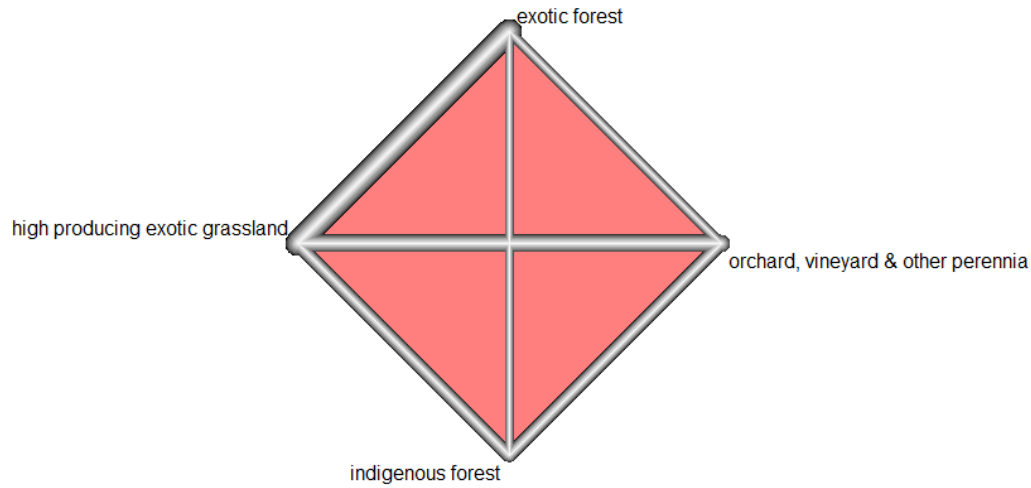

1090

1091 **Fig. S42.** Evidence network for land cover comparisons on regional and local climate  
1092 regulation.

1093

1094 **Evidence base:** This evidence network is formed by seven pairwise comparisons of four  
1095 land covers. Data were obtained from two different studies, each contributing a minimum  
1096 of one and a maximum of three pairwise land cover comparisons. The number of  
1097 comparisons per land cover is as follows:

- 1098 • High producing exotic grassland (four comparisons)
- 1099 • Exotic forest (four comparisons)
- 1100 • Orchard, vineyard & other perennial crops (three comparisons)
- 1101 • Indigenous forest (three comparisons)

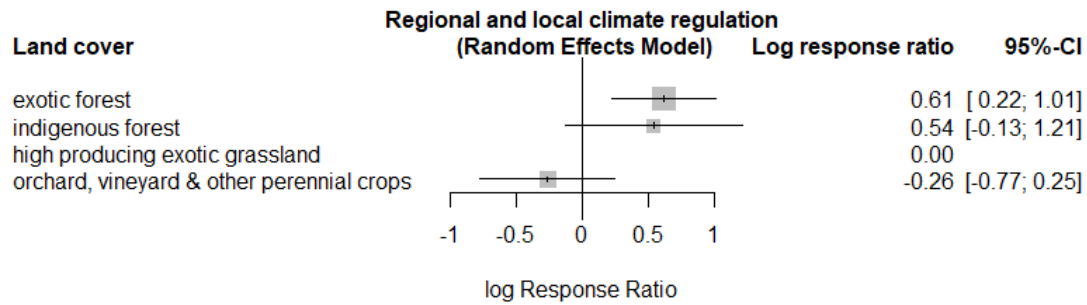

1102

1103 **Fig. S43.** Forest plot of land cover contrasts in the provision of regional and local climate  
 1104 regulation. Random effects model with high producing exotic grassland as a reference.

1105

1106 **Measures of heterogeneity/network inconsistency:**

1107  $\tau^2$  = Not available

1108  $I^2$  = Not available

1109 **Main results:**

- 1110 • Besides exotic forests (which are significantly better than the reference land cover), all  
 1111 the land covers have overlapping confidence intervals and, consequently, are not  
 1112 significantly different from each other in the provision of this service. This is probably  
 1113 due to the limited number of studies with evidence on this service.
- 1114 • The ratio estimates suggest that forested land covers tend to deliver greater climate  
 1115 regulation at the local and regional level than the high producing exotic grassland and  
 1116 the orchard land covers.

1117

1118 *A note on confidence intervals and the size of the evidence base*

1119 The forest plots above show that, primary production, erosion control, pest regulation,  
 1120 waste treatment, capture fisheries, ethical & spiritual values, pollination and regional &  
 1121 local climate regulation all present wide, overlapping confidence intervals for all or most of  
 1122 their estimates. This suggests that differences in the provision of all of these services across

1123 land covers were not significant. For some of these services, this is due to smaller evidence  
 1124 bases, as in the case of pollination and regional & local climate regulation where the  
 1125 network meta-analysis was informed by only 7 - 8 comparisons taken from 2 different  
 1126 studies. For services with a slightly larger evidence base (e.g., capture fisheries, ethical and  
 1127 spiritual values, pest regulation and waste treatment) there is an asymmetry in the number  
 1128 of comparisons available for the different land covers, since one or two pairs of land covers  
 1129 harness most of the comparisons and leave limited evidence for the other pairs of  
 1130 comparisons (note the large differences in link weights in the corresponding evidence  
 1131 networks presented above). With over 60 pairwise comparisons across all land covers, the  
 1132 evidence base for primary production has a similar problem since most of the comparisons  
 1133 involve high producing exotic grasslands, indigenous and exotic forests. A similar trend can  
 1134 be observed with some (but not all) pairs of land covers for other well-informed services,  
 1135 such as regulation of water timing and flows and soil formation. For waste treatment, the  
 1136 low sample size results from having few comparisons (13 in total) spread over a large  
 1137 number of land covers (7 in all), which results in an evidence network formed by several,  
 1138 poorly informed links.

1139 **Appendix 11. Detailed results from PERMANOVA analyses**

1140 **Table S7.** Detailed output of the permutational analysis of variance (PERMANOVA, adonis)  
 1141 on the effects of land cover characteristics on land cover provision of multiple ecosystem  
 1142 services. Model specified with production as the first variable term.

| Variable                                   | Degrees of freedom | <i>F</i> | Partial <i>R</i> <sup>2</sup> | <i>p</i> - value |
|--------------------------------------------|--------------------|----------|-------------------------------|------------------|
| Production                                 | 1                  | 2.927    | 0.259                         | <b>0.00995</b>   |
| Forest cover                               | 1                  | 1.226    | 0.109                         | 0.289            |
| Interaction (Production :<br>Forest cover) | 1                  | 1.141    | 0.101                         | 0.338            |
| Residuals                                  | 6                  |          | 0.531                         |                  |
| Total                                      | 9                  |          | 1.000                         |                  |



1143 **Table S8.** Detailed output of the permutational analysis of variance (PERMANOVA, adonis)  
 1144 on the effects of land cover characteristics on land cover provision of multiple ecosystem  
 1145 services. Model specified with forest cover as the first variable term.

| Variable                                   | Degrees of freedom | <i>F</i> | Partial <i>R</i> <sup>2</sup> | <i>p</i> - value |
|--------------------------------------------|--------------------|----------|-------------------------------|------------------|
| Forest cover                               | 1                  | 1.226    | 0.109                         | 0.333            |
| Production                                 | 1                  | 2.927    | 0.259                         | <b>0.0199</b>    |
| Interaction (Production :<br>Forest cover) | 1                  | 1.141    | 0.101                         | 0.328            |
| Residuals                                  | 6                  |          | 0.531                         |                  |
| Total                                      | 9                  |          | 1.000                         |                  |

1146 **Table S9.** Comparisons of group mean dispersions for variables on land cover  
 1147 characteristics. Separate tests were conducted for each variable (permdisp: betadisper and  
 1148 permutest with 999 permutations).

| Variable     | <i>F</i> <sub>(1,8)</sub> | <i>p</i> - value |
|--------------|---------------------------|------------------|
| Production   | 0.1508                    | 0.683            |
| Forest cover | 1.1379                    | 0.348            |

1149  
 1150 **Table S10.** Detailed output of the PERMANOVA (adonis) on the effects of ecosystem  
 1151 service characteristics on ecosystem service provision across multiple land covers. Model  
 1152 specified with biophysical domain as the first variable term.

| Variable           | Degrees of freedom | <i>F</i> | Partial <i>R</i> <sup>2</sup> | <i>p</i> - value |
|--------------------|--------------------|----------|-------------------------------|------------------|
| Biophysical domain | 2                  | 2.253    | 0.312                         | 0.065            |
| Scale of benefits  | 2                  | 2.973    | 0.411                         | <b>0.045</b>     |
| Residuals          | 4                  |          | 0.277                         |                  |
| Total              | 8                  |          | 1.000                         |                  |

1153 **Table S11.** Detailed output of the PERMANOVA (adonis) on the effects of ecosystem  
 1154 service characteristics on ecosystem service provision across multiple land covers. Model  
 1155 specified with scale of benefits as the first variable term.

| Variable           | Degrees of freedom | <i>F</i> | Partial <i>R</i> <sup>2</sup> | <i>p</i> - value |
|--------------------|--------------------|----------|-------------------------------|------------------|
| Scale of benefits  | 2                  | 2.337    | 0.323                         | 0.055            |
| Biophysical domain | 2                  | 2.888    | 0.400                         | <b>0.035</b>     |
| Residuals          | 4                  |          | 0.277                         |                  |
| Total              | 8                  |          | 1.000                         |                  |

1156 **Table S12.** Comparisons of group mean dispersions for variables on ecosystem service  
 1157 characteristics. Separate tests were conducted for each variable (permdisp: betadisper and  
 1158 permutest with 999 permutations).

| Variable           | <i>F</i> <sub>(1,8)</sub> | <i>p</i> - value |
|--------------------|---------------------------|------------------|
| Scale of benefits  | 0.486                     | 0.688            |
| Biophysical domain | 0.823                     | 0.623            |

1159

1160 **Captions for datasets S1 to S2**

1161 **SI Dataset 1:** Quantitative indicators used to quantify provision of each ecosystem service.  
 1162 For each indicator the units used by different studies are given. Indicators that lack units  
 1163 are reported as index or ratio in the units column. If the indicator is a variable that was  
 1164 logged, units of the variable before applying the logarithm are generally given. “No. Studies”  
 1165 describes the number of studies reporting each of the indicators in our dataset.

1166 **SI Dataset 2:** Final log Response Ratios on ecosystem service provision for pairwise  
 1167 comparison of land covers in each study used in our analysis. Within each study, log  
 1168 Response Ratios of multiple indicators of provision for the same ecosystem service have  
 1169 been aggregated to a single value per service for each pairwise land cover comparison of

1170 land covers. Column heading abbreviations: Ecosystem service (ES), Study ID (S.ID), Land  
1171 Cover (LC), Log Response Ratio (LRR), Variance (Var) and Standard Error (SE).

## 1172 **References**

1173 1. MacLeod CJ, Moller H (2006) Intensification and diversification of New Zealand  
1174 agriculture since 1960: An evaluation of current indicators of land use change. *Agriculture,*  
1175 *Ecosystems and Environment* 115(1-4):201–218.

1176 2. Wallace BC, Small K, Brodley CE, Lau J, Trikalinos TA (2012) Deploying an interactive  
1177 machine learning system in an evidence-based practice center. *Proceedings of the 2nd ACM*  
1178 *SIGHIT symposium on International health informatics - IHI '12*:819.

1179 3. Wan X, Wang W, Liu J, Tong T (2014) Estimating the sample mean and standard  
1180 deviation from the sample size, median, range and/or interquartile range. *BMC Medical*  
1181 *Research Methodology* 14(1):135.

1182 4. Taylor LR (1961) Aggregation, variance and the mean. *Nature* 189(4766):732–735.

1183 5. Rosenberg MS, Rothstein HR, Gurevitch J (2013) Effect sizes: conventional choices and  
1184 calculations. *Handbook of Meta-Analysis in Ecology and Evolution* (Princeton University  
1185 Press, Princeton), pp 61–71.

1186 6. Rücker G, Schwarzer G (2015) Ranking treatments in frequentist network meta-analysis  
1187 works without resampling methods. *BMC Medical Research Methodology* 15(1):58.

1188 7. Lavelle P, et al. (2005) Nutrient Cycling. *Ecosystems and Human Well-Being: Current State*  
1189 *and Trends Assessment*, pp 333–353.

1190 8. Graaff M-A de, Groenigen K-J van, Six J, Hungate B, Kessel C van (2006) Interactions  
1191 between plant growth and soil nutrient cycling under elevated CO<sub>2</sub>: a meta-analysis.  
1192 *Global Change Biology* 12(11):2077–2091.

1193 9. MEA (2005) *Ecosystems and human well-being: Synthesis* (Island Press, Washington)  
1194 Available at: <http://www.who.int/entity/globalchange/ecosystems/ecosys.pdf>.
