# 1 **Consistent trade-offs in ecosystem services between land** 2 **covers with different production intensities**

3 **Carla Gómez-Creutzberg<sup>1,\*</sup>, Malgorzata Lagisz<sup>b</sup>, Shinichi Nakagawa<sup>b</sup>, Eckehard G.**  
4 **Brockerhoff<sup>c,d</sup> and Jason M. Tylianakis<sup>1,\*</sup>**

5 <sup>a</sup> Centre for Integrative Ecology, University of Canterbury, Christchurch 8140, New Zealand;

6 <sup>b</sup> Evolution & Ecology Research Centre, School of Biological, Earth and Environmental  
7 Sciences, University of New South Wales, Sydney, NSW, 2052, Australia; <sup>c</sup> Scion (New  
8 Zealand Forest Research Institute), Christchurch 8440, New Zealand; <sup>d</sup> Swiss Federal  
9 Research Institute WSL, Zürcherstrasse 111, CH-8903 Birmensdorf, Switzerland (Present  
10 address);

11 \* To whom correspondence may be addressed. Email: [cgomezcre@gmail.com](mailto:cgomezcre@gmail.com) or  
12 [jason.tylianakis@canterbury.ac.nz](mailto:jason.tylianakis@canterbury.ac.nz), telephone +64 3 3695379

## 13 **ABSTRACT**

14 Sustaining multiple ecosystem services across a landscape requires an understanding of  
15 how consistently services are shaped by different categories of land uses. Yet, this  
16 understanding is generally constrained by the availability of fine-resolution data for  
17 multiple services across large areas and the spatial variability of land-use effects on  
18 services. We systematically surveyed published literature for New Zealand (1970 – 2015)  
19 to quantify the supply of 17 services across 25 land covers (as a proxy for land use). We  
20 found a consistent trade-off in the services supplied by anthropogenic land covers with a  
21 high production intensity (e.g., cropping) versus those with extensive or no production. In  
22 contrast, forest cover was not associated with any distinct patterns of service supply. By  
23 drawing on existing research findings we reveal complementarity and redundancy  
24 (potentially influencing resilience) in service supply from different land covers. This can  
25 guide practitioners in shaping land systems that sustainably support human well-being.

26 *Key words:* Land-use planning, environmental management, ecosystem service bundles,  
27 quantitative review, network meta-analysis.

## 28 **CONTENTS**

|    |                                                                       |    |
|----|-----------------------------------------------------------------------|----|
| 29 | I. INTRODUCTION.....                                                  | 2  |
| 30 | II. METHODS.....                                                      | 5  |
| 31 | (1) Data collection, aggregation and calculation of effect sizes..... | 6  |
| 32 | (2) Data analysis .....                                               | 9  |
| 33 | III. RESULTS.....                                                     | 12 |
| 34 | (1) Data coverage.....                                                | 12 |
| 35 | (2) Land cover effects on individual ES .....                         | 13 |
| 36 | (3) Land cover effects across multiple ES .....                       | 15 |
| 37 | (a) Differences among ES from the land covers that supply them .....  | 15 |
| 38 | (b) Differences among land covers in their supply of services.....    | 16 |
| 39 | IV. DISCUSSION.....                                                   | 17 |
| 40 | V. CONCLUSIONS.....                                                   | 23 |
| 41 | VI. ACKNOWLEDGEMENTS .....                                            | 24 |
| 42 | VII. AUTHOR CONTRIBUTIONS.....                                        | 24 |
| 43 | VIII. REFERENCES.....                                                 | 24 |
| 44 | IX. SUPPORTING INFORMATION.....                                       | 33 |

## 45 **I. INTRODUCTION**

46 Human transformation of the Earth’s surface through land-use activities has reached an  
47 unprecedented magnitude, and constitutes a major driver of global environmental change  
48 (Turner, Lambin, & Reenberg, 2008; Steffen *et al.*, 2015). Humans rely on resources  
49 appropriated through land use, however most of these practices affect the Earth’s  
50 ecosystems in ways that undermine human well-being (Foley *et al.*, 2005). Continued

51 population growth and increased per capita consumption of resources (Godfray *et al.*,  
52 2010) make it critical to find the ways to reconcile production and sustainability in land  
53 systems.

54 Ecosystem services (ES) offer a framework for addressing these complex issues by  
55 explicitly accounting for the benefits that ecosystems bring to society. Central to this  
56 framework is the idea that human well-being is underpinned by a diverse constellation of  
57 ES (MEA, 2005). Most of these ES are not accounted for in conventional land use planning  
58 and management decisions which, instead, tend to focus on the production of a single ES  
59 (e.g., provision of food or timber) (Robertson & Swinton, 2005; Rodríguez *et al.*, 2006). By  
60 highlighting the importance of multiple over individual services, the ES framework  
61 encourages decision makers to prioritize long-term well-being over immediate economic  
62 reward (Guerry *et al.*, 2015; Costanza *et al.*, 2014).

63 Developing strategies that optimize ES across different land uses, or enhance multiple ES  
64 within a single type of land use (Lambin & Meyfroidt, 2011), relies on understanding the  
65 occurrence and interactions between different ES and their responses to management  
66 interventions. To this end, important efforts have been made to map and quantify ES  
67 supply (see Crossman *et al.*, 2013; Groot *et al.*, 2012; and Martínez-Harms & Balvanera,  
68 2012 for reviews) and, more specifically, assess how different ES are enhanced  
69 synergistically or traded-off against each other (Nelson *et al.*, 2009; Bateman *et al.*, 2013).  
70 More recently, research on ES trade-offs and synergies has come together under the  
71 concept of ES bundles: groups of ES that repeatedly appear together in space and/or time  
72 (Raudsepp-Hearne, Peterson, & Bennett, 2010; Saidi & Spray, 2018). ES bundles can be  
73 examined in terms of the supply (Queiroz *et al.*, 2015) and the demand (Ament *et al.*, 2017)  
74 of ES. In either case, ES bundles can be used subsequently to identify any common  
75 processes or external factors driving different ES (Mouchet *et al.*, 2014).

76 A systematic review of 51 studies on ES bundles revealed multiple approaches to bundling  
77 ES and the consequent difficulties in obtaining cross-site comparisons and generalizations  
78 of bundles and their drivers (Saidi & Spray, 2018). Moreover, even when the same  
79 methods, datasets and groups of ES were used to identify ES bundles and their relation to

80 social-ecological variables in two regions, the results were highly inconsistent between  
81 regions (Spake *et al.*, 2017) and, therefore, not generalizable to other locations. This  
82 inconsistency may result from the choice of ES indicators, socio-ecological variables and  
83 spatial units of analysis (Spake *et al.*, 2017). Often, studies that examine ES bundles use  
84 administrative units (e.g., municipalities) as the scale at which ES are quantified (Saidi &  
85 Spray, 2018). However, administrative units can mask ES associations because they: 1) are  
86 variable in size (within the same hierarchical level), 2) occur at scales that are too coarse to  
87 capture the fine-scale processes linked to some ES, 3) encompass heterogeneous sets of  
88 land covers / land uses and 4) have boundaries that may cut across ecologically relevant  
89 units (Spake *et al.*, 2017). Therefore, identifying consistent rules regarding ES bundles and  
90 their drivers requires tailored analyses that focus on finer scales, such as ES measured in  
91 individual plots within land cover types (Spake *et al.*, 2017).

92 Here we directly test whether there are any general rules for the effect of land use on ES  
93 bundles by assessing the supply of multiple ES across land covers (as a proxy for land use)  
94 at a national scale. We systematically surveyed the published literature for New Zealand  
95 (1970 - 2015) to collate studies with quantitative evidence of how different land covers  
96 compare against each other in processes relating to the supply of one or more ES. For each  
97 study, we calculated standardized pairwise comparisons (expressed as log response ratios)  
98 of land covers in their supply of individual services. We used these ratios to conduct  
99 network meta-analysis for individual services and obtained, for each service, quantitative  
100 estimates of service supply from individual land covers.

101 With this comprehensive evidence base, we first discuss land cover effects on individual ES  
102 and then examine associations between ES to delineate any potential synergies and trade-  
103 offs arising from services that are best supplied by similar or different land covers.  
104 Similarly, we also examine associations between land covers based on the different ES they  
105 supply. We use this to detect: 1) any land covers that may be operating as “generalists”  
106 (i.e. supplying many ES) or “specialists” (i.e. supplying just a few ES) and 2) groups of land  
107 covers that supply similar profiles of ES (i.e. ES bundles sensu Raudsepp-Hearne *et al.*,  
108 2010). The latter includes services that are typically traded off against each other.

109 Subsequently, we test whether there are generalities regarding how categories of land  
110 cover influence ES bundles (i.e. sets of ES supplied consistently across more than one land  
111 cover) by testing for systematic differences between forested and non-forested habitats  
112 and between exotic-species-dominated production and native non-production land covers  
113 (note that we use the term production to refer to economic activity rather than primary  
114 production). If they exist, these differences would suggest that production/no production,  
115 forest/non-forest cover and native/exotic vegetation are attributes that drive changes in ES  
116 supply across multiple land covers. Previous research has shown that attributes of single  
117 land cover types can drive the value of multiple ES (Sutherland, Gergel, & Bennett, 2016)  
118 and trade-offs and synergies between ES (Felipe-Lucia *et al.*, 2018). Duarte and colleagues  
119 (2018) also present evidence that landscape composition metrics (e.g., percentage of  
120 natural areas and of non-crop areas) affect some ES (water quality, pest regulation,  
121 pollination and disease mitigation); however, their analysis did not identify specific  
122 attributes of natural or non-crop areas that could shape ES supply. Our analysis extends  
123 these perspectives to include attributes shared by multiple land covers, which can  
124 potentially inform management decisions at broader scales and allow generalities across  
125 land covers. We conclude with an example of how our findings can be used to examine the  
126 effects of land cover trajectories or contrasting management decisions on landscape-scale  
127 ES trade-offs.

## 128 **II. METHODS**

129 Unlike existing reviews and meta-analyses on ES (e.g., Howe *et al.*, 2014; Malinga *et al.*,  
130 2015; Lee & Lautenbach, 2016; Nieto-Romero *et al.*, 2014), our work does not collate  
131 existing ES assessments. Rather, we synthesize primary biophysical research that  
132 compares land covers in relation to a large variety of measures (which we term ‘ES  
133 indicators’) that indicate the supply of an ES, regardless of whether ES terminology was  
134 used. Despite the growing literature on ES (Chaudhary *et al.*, 2015), our understanding of  
135 ES bundles, trade-offs and synergies has traditionally been impaired by the lack of, and  
136 costliness of obtaining, detailed spatial data on multiple ES from multiple land uses across  
137 landscapes (Andrew *et al.*, 2015). This has led to the widespread approach of using expert

138 or model estimates of ES per land use or land cover class as input for ES assessments (see  
139 Jacobs *et al.*, 2015 for a review; Aldana Domínguez *et al.*, 2019; and Chen, Chi, & Li, 2019  
140 provide recent examples). Here, we propose an alternative approach that makes it possible  
141 to use primary data to study land cover and ES relations by capitalizing upon existing  
142 research across multiple disciplines. We use New Zealand as a case study because the high  
143 levels of endemic flora and fauna and relatively recent introduction of large-scale intensive  
144 agriculture make conservation-production tensions particularly acute, and necessitate  
145 conservation strategies that go beyond protected areas (Craig *et al.*, 2000).

146 Our systematic review was structured according to the “Guidelines for Systematic Review  
147 in Environmental Management” developed by the Collaboration for Environmental  
148 Evidence (CEE, 2013). We searched the literature for quantitative comparisons of two or  
149 more land covers in the supply of one or more ES within New Zealand. Our ES definitions  
150 were adapted from the Millennium Ecosystem Assessment (MEA, 2005), with a total of 35  
151 ES spanning across the provisioning, regulating, cultural and supporting categories  
152 (Supplementary Dataset 1). Despite the debates on whether the Millennium Ecosystem  
153 Assessment classification of ES leads to double counting of some services (Wallace, 2007;  
154 Fisher, Turner, & Morling, 2009), we have adopted it in this study because of its wide use  
155 and because our main interest was not to render a final valuation of ES (where double  
156 counting would be an issue), but instead to provide a comprehensive overview of the  
157 complete spectrum of direct and indirect benefits from ecosystems. Land uses, formally  
158 defined as the purposes to which humans put land into use (Dale *et al.*, 2000), were  
159 captured in our research as land covers (Supplementary Dataset 2), since these include  
160 units that are not directly used by humans and, consequently, correspond more closely  
161 with the actual experimental or sampling units of many of the documents in our search.

#### 162 **(1) Data collection, aggregation and calculation of effect sizes**

163 Full details of the search and screening process are described in Supplementary Methods 1;  
164 here we present a brief outline. We searched the Scopus database for titles, abstracts and  
165 keywords with at least one match in each of the 3 components that structured our search:  
166 1) “New Zealand”, 2) land cover and land use terms and 3) ES terms (see Supplementary

167 Methods 2 for the full search phrase). Land cover terms included all possible variations of  
168 “land use” and “land cover” as well as the names of specific land use and land cover types  
169 (both generic and specific to New Zealand). The ES component drew upon the names of  
170 each service (and possible variations of these) but also included vocabulary describing  
171 processes and conditions that could reflect their supply at the site scale akin to individual  
172 land cover units. The search was finalized in December 2014, and was constrained to  
173 include documents published from 1970 onward, to be comparable with current land use  
174 regimes in New Zealand (MacLeod & Moller, 2006).

175 Our keyword search yielded 9,741 references. An initial automated screening process  
176 reduced these to 4,373 publications by removing references that only mentioned a single  
177 type of land cover or land use in their title, abstract and keywords. We excluded these  
178 studies because measures of ES supply from single land covers could not be standardized  
179 in a way that would make them comparable across studies *and* compatible with the  
180 standardized land cover comparisons of ES supply that informed the rest of our meta-  
181 analysis.

182 Publications with 2 or more land cover terms were scanned using Abstrackr, an interactive  
183 machine learning system for semi-automated abstract screening, often used in medical  
184 meta-analyses (Wallace *et al.*, 2012). By learning from the abstracts or words that a user  
185 identifies as relevant during the screening process, Abstrackr can predict the likely  
186 relevance of unscreened abstracts and effectively assist in the exclusion of irrelevant ones  
187 (more details in Supplementary Methods 1).

188 Abstract screening yielded 914 relevant papers, which were passed on to a team of four  
189 reviewers for full-text assessment and data extraction. Studies that did not have replicated  
190 observations (as defined in Supplementary Methods 1) for any land covers were discarded,  
191 whereas studies that contained replication on some, but not all, of the land covers were  
192 kept and only data on the replicated land covers were extracted. Although we only included  
193 terrestrial land covers, ES supplied by land but linked to a water body were included in our  
194 analysis. Full details of how the full-text selection criteria were applied can be found in

195 Supplementary Methods 3. In total, we extracted data from 133 studies that met all  
196 inclusion criteria (see Supplementary Dataset 4 for bibliographic details of each study).  
197 Information on the land covers, quantitative measures of ES supply, experimental design  
198 and bibliographic details for each study was collated in a database. To allow for  
199 comparability across studies, individual land covers described in each study were matched  
200 to the nearest category in New Zealand's Land Cover Database - LCDB (Thompson, Grüner,  
201 & Gapare, 2003). This classification system includes forest, shrubland and grassland areas  
202 of either predominantly native or exotic vegetation, as well as cropland and more artificial  
203 surfaces such as built-up surfaces and mining areas (Supplementary Dataset 2).

204 Often, the same quantitative measure of ES supply obtained from a study (indicators,  
205 presented in Supplementary Dataset 3) would be relevant to more than one ES. This  
206 reflects the overlaps that exist between different ES (e.g., soil structure plays a role in both  
207 soil formation and regulation of water timing and flows), and the multiple values that  
208 humans can receive from a given ecosystem process. We therefore decided to assign each  
209 indicator to as many ES as it was relevant to, and use this allocation in our main analysis.  
210 However, to understand the influence on our results of sharing indicators between ES, we  
211 also conducted the same analysis with each indicator assigned to only one ES. In  
212 Supplementary Results 5 we present the results of this analysis.

213 For each indicator - ES combination we defined the general direction of the relationship by  
214 determining whether larger values of the indicator would generally reflect an increase or  
215 decrease in ES supply. This was done because the majority of the studies in our meta-  
216 analysis did not explicitly use 'ecosystem services' terminology. Instead, they measured  
217 environmental or ecological variables that could be used as indicators of ES supply,  
218 provided a conceptual link could be defined between the indicator (e.g., annual water  
219 discharge of a catchment) and the corresponding ES (provision of freshwater). When we  
220 could not readily assign indicators to ES or determine the direction of the indicator - ES  
221 relationship we consulted with experts with specialized knowledge of the field related to  
222 each indicator (see Acknowledgements). Although we recognize that the relationship  
223 between an indicator and a ES may be non-linear (e.g., pollination services may saturate



224 with large numbers of pollinators), in most cases it was not possible to establish a clearly  
225 defined non-linear function, so we assumed a linear relationship for all indicators.  
226 Supplementary Dataset 3 provides an overview of the relations we defined between each  
227 indicator and ES.

228 Unique identifiers allowed us to define individual studies, regardless of whether they were  
229 within a publication that included more than one study or across different publications  
230 (Supplementary Methods 1). Multiple measures from within the same replicate site were  
231 aggregated into a single value per replicate (see Supplementary Methods 1 for details).  
232 Methods for standardizing measures of variance are presented in Supplementary Methods  
233 4.

234 We obtained a final database with information on 457 ES indicators among 2,943 pairwise  
235 comparisons of land covers from 133 studies. A log response ratio was used as the effect  
236 measure for comparing pairs of land covers within each study, and was standardized such  
237 that larger values always represented greater ES supply in the numerator land cover  
238 relative to the denominator one (see Supplementary Methods 1 for this standardization  
239 and log response ratio variance calculations).

240 Studies with more than one indicator of a given ES were aggregated to have the same  
241 weight as studies with only a single indicator (this was based on either the mean log  
242 response ratio across multiple indicators or the single indicator represented in all land  
243 covers of a study, details in Supplementary Methods 1). Subsequently, the total number of  
244 land cover comparisons in our final dataset of 133 studies was reduced from 2,943 to 920  
245 comparisons for individual ES within single studies (See Supplementary Dataset 5 for an  
246 overview of the final data).

## 247 **(2) Data analysis**

248 Data analysis was conducted as a two stage process: we first examined the supply of each  
249 ES by different land covers, and then assessed the relationships among land covers in terms  
250 of multiple ES. For the first stage, we conducted a separate network meta-analysis (Salanti,  
251 2012) for each ES. While conventional meta-analysis compares 2 treatments at a time

252 (using direct comparisons from each study), a network meta-analysis can compare multiple  
253 (i.e. 3 or more) treatments simultaneously. This is achieved by using both direct evidence  
254 (studies comparing pairs of treatments) and indirect evidence derived from linking  
255 common treatments across different studies in a network of evidence (Salanti, 2012). For  
256 example, if some studies show that land cover A is better than B in supplying an ES, and  
257 others provide direct evidence that B is better than C, then a network meta-analysis allows  
258 us to make the inference that A will also be better than C. We therefore used network meta-  
259 analysis to compare, for each ES, a wide array of land covers across different studies, even  
260 though we did not have data for direct comparisons among all combinations of land covers.

261 We conducted our network meta-analyses with the R package *Netmeta* (Schwarzer *et al.*,  
262 2019), which offers a frequentist approach to calculate point estimates (and their  
263 corresponding 95% confidence intervals) of the effect of the different land covers on the  
264 supply of individual ES. Estimates were expressed as the log response ratio of each land  
265 cover relative to a reference land cover: high producing exotic grassland. We selected this  
266 land cover as our reference, because it was the only land cover that was represented across  
267 all ES in our dataset (and would therefore allow us to compare our results across ES at a  
268 later stage).

269 In *Netmeta*, we used a random effects meta-analytic model to generate estimates and  
270 confidence intervals from which we then calculated probability scores (*P*-scores; Rucker &  
271 Schwarzer, 2015) on how different land covers ranked in the supply of each ES. Estimates,  
272 confidence intervals and *P*-scores then allowed us to construct, for each ES, a so-called  
273 forest plot or blobbogram (*sensu* Lewis & Clarke, 2001) to compare different land covers in  
274 their ES supply.

275 Bundles, trade-offs and synergies in land cover effects across the whole suite of ES were  
276 then examined using hierarchical clustering of the network meta-analytic estimates. For  
277 this, we constructed a land cover by ES matrix (Fig. S44, Supplementary Results 3) using  
278 the estimated log response ratios of each land cover (relative to the high producing exotic  
279 grassland reference) in each ES, as determined with the individual network meta-analyses.

280 Missing values in this matrix resulted from sets of land covers for which we had no  
281 information on a given ES or could not infer the corresponding ratios.

282 For analysis, we selected subsets of this matrix with no gaps and the largest possible  
283 number of total cells. This resulted in two data subsets: a matrix of nine ES by eight land  
284 covers and another matrix with nine land covers by eight ES. The matrix with nine ES was  
285 rotated to have ES as rows (land covers as columns) and used to compare ES in terms of the  
286 land covers that supply them. This allowed us to identify ES bundles (sets of ES supplied  
287 similarly across multiple land covers), synergies in ES supply, and ES that would likely be  
288 traded off with one another in land-use decisions. The matrix with nine land covers was  
289 used to compare land covers (to identify redundancy) in the supply of eight ES. This  
290 allowed us to explore how land-cover differences influence ES bundles.

291 We calculated a dissimilarity matrix from each of these matrices using the *daisy* function of  
292 the *cluster* package for R (Maechler *et al.*, 2019) with Euclidean distances. For the rotated  
293 matrix with nine ES, distances were based on ES observations for each land cover, while for  
294 the matrix with nine land covers, distances were based on land cover observations for each  
295 ES. We applied hierarchical clustering (using the R *hclust* function; R Core Team, 2019) to  
296 each of the distance matrices and constructed dendrograms on how different land covers  
297 or ES compared against each other. Following Raudsepp-Hearne *et al.* (2010), we also used  
298 these distance matrices to conduct k-means cluster analysis (with the *kmeans* function in R;  
299 R Core Team, 2019) and identify groups of land covers and ES exhibiting similar behavior.  
300 In each case, the number of clusters was determined using a scree plot (Figs. S3 and S4,  
301 Supplementary Methods 5).

302 Finally, we used our distance matrices with nine land covers to test hypotheses on whether  
303 broad categories of land covers explained the trends observed in the corresponding  
304 clustering. Specifically, land covers were grouped under two categorical variables, one  
305 denoting the presence/absence of forest cover and another separating production land  
306 covers, dominated by exotic vegetation cover, from those with no production activities.  
307 Originally, we expected to compare land covers with a native vs. exotic vegetation cover  
308 separately from production vs. no production. However, we omitted the former category

309 because, except for one, all land covers with exotic vegetation were production and all  
310 native covers had little or no production. We used a permutational multivariate analysis of  
311 variance (PERMANOVA) to test whether these variables or their interaction explained  
312 between-land-cover differences in the supply of multiple ES.

313 PERMANOVA analyses were conducted using the *adonis* function of the *vegan* package in R  
314 (Oksanen *et al.*, 2019). Variables are added sequentially in the *adonis* algorithm. To be  
315 conservative, we performed the PERMANOVA twice and swapped the order of the variables  
316 in the second iteration, so that each variable was tested second, after controlling for any  
317 collinearity with the other predictor (i.e. adjusted sums of squares). The *betadisper*  
318 function of the *vegan* package was used to test the assumption of multivariate homogeneity  
319 of group dispersions, and all tests met this assumption. Table S4 (Supplementary Methods  
320 5) presents the land cover categories used in these analyses.

### 321 **III. RESULTS**

#### 322 **(1) Data coverage**

323 From our systematic survey, we identified a total of 133 studies that were relevant to our  
324 analysis and matched our selection criteria. Overall, these studies contributed data on 17  
325 different ES, 25 land cover types and 457 measures (which we term 'ES indicators') on ES  
326 supply. All four of the Millennium Ecosystem Assessment ES categories (supporting,  
327 provisioning, regulating and cultural services; MEA, 2005) were represented within our  
328 dataset. However, most studies examined supporting and regulating services, with 115 and  
329 110 studies, respectively. Only 44 studies presented data on provisioning services and four  
330 on cultural ones. All of the ES in the supporting category (habitat provision, nutrient  
331 cycling, soil formation, water cycling and primary production) are represented in our  
332 database. Only four land cover comparisons had more than 20 studies (high producing  
333 exotic grassland vs. exotic forest, indigenous forest vs. high producing exotic grassland,  
334 short-rotation cropland vs. high producing exotic grassland and exotic forest vs. indigenous  
335 forest); whereas the remaining land cover pairs were represented by 10 or fewer studies

336 each. Further details on the number of studies per land cover comparison and per  
337 combination of ES and land cover are available in Supplementary Results 1.

## 338 **(2) Land cover effects on individual ES**

339 There were consistent trends in the supply of multiple services by specific land cover types,  
340 but also great variability in the supply of some services. An overview of the evidence base  
341 (number of studies, types of ES indicators and network of land cover comparisons) and the  
342 outcomes of the individual network meta-analyses for each of the 17 ES in our database is  
343 presented in Supplementary Results 2. In this supplement, we use forest plots (*sensu* Lewis  
344 & Clarke, 2001), see Fig. S8, Supplementary Results 2 for an example) to show the main  
345 results of the meta-analysis, i.e. how different land covers compare against each other in  
346 their supply individual ES. Specifically, the values in these plots are given as log response  
347 ratios which express the overall estimates of service supply by individual land covers  
348 relative to a reference land cover (high-producing exotic grassland).

349 For several ES, the positive log response ratio estimate and narrow confidence intervals in  
350 the forest plots (Figs. S8, S17, S19, S38, Supplementary Results 2) reveal that land covers  
351 with native vegetation cover (i.e. broadleaved indigenous hardwoods, indigenous forest,  
352 manuka/kanuka, matagouri or grey scrub and, in many cases, tall tussock grassland)  
353 tended to rank higher in ES supply than the more intensive high-value production land  
354 covers (particularly short-rotation cropland and high-producing exotic grassland).  
355 Regulation of water timing and flows, water purification, freshwater provision and disease  
356 mitigation conformed to this general pattern. In these services, low producing grasslands  
357 (which comprise a mix of exotic and native vegetation) and exotic forests also perform  
358 relatively well and always rank within the top half of all land covers.

359 For habitat provision (Fig. S13, Supplementary Results 2) the difference between land  
360 covers with native vegetation and production systems was less important than the  
361 presence of forest vegetation cover. For this service, most land covers with forest  
362 vegetation (exotic forest, broadleaved indigenous hardwoods and indigenous forest)  
363 ranked higher in their estimates of ES supply than those with open covers (short-rotation  
364 cropland, tussock, low and high producing grasslands) or deciduous hardwoods.

365 Meanwhile, primary production tended to be highest under production systems (e.g.,  
366 croplands, exotic forest, and high-intensity grassland) and lower in land covers with low or  
367 no production (e.g., low producing and tussock grasslands, indigenous forest), rather than  
368 differing between forested and open covers. However, these trends were not statistically  
369 significant due to the wide and overlapping confidence intervals (Fig. S23, Supplementary  
370 Results 2).

371 Importantly, these results indicate that no single land cover supplies all ES at a maximal  
372 level. Indigenous forests ranked high in the supply of many ES (particularly habitat  
373 provision, freshwater provision, disease mitigation and global climate regulation -  
374 Supplementary Results 2). However, in some ES they were outperformed by other land  
375 covers such as tall tussock grasslands (which were well suited to water purification; Fig.  
376 S19, Supplementary Results 2) and advanced successional forest (broadleaved indigenous  
377 hardwoods, which ranked high in regulation of water timing and flows, nutrient cycling and  
378 habitat provision; Figs. S8, S11 and S13, Supplementary Results 2). Therefore, multiple land  
379 covers will be required within the landscape to ensure the supply of multiple ES.

380 The forest plots in Supplementary Results 2 for primary production (Fig. S23), erosion  
381 control (Fig. S27), pest regulation (Fig. S30), waste treatment (Fig. S32), capture fisheries  
382 (Fig. S34), ethical & spiritual values (Fig. S36), pollination (Fig. S41) and regional & local  
383 climate regulation (Fig. S43) all present wide, overlapping confidence intervals for all or  
384 most of their estimates. This suggests statistically non-significant differences in the supply  
385 of these services among land covers. For some services, this could be due to small evidence  
386 bases, either in terms of few studies or few comparisons for specific land cover pairs within  
387 the network of land cover comparisons that inform the meta-analysis. In the case of erosion  
388 control, where the evidence base is formed by 22 studies (Supplementary Results 2 -  
389 Erosion control), overlapping confidence intervals in the land covers with the greatest  
390 number of comparisons (which would therefore be expected to have lower variance) still  
391 expressed high variability in ES supply, suggesting that other factors besides land cover  
392 (e.g., slope, soil type) likely account for the differences in erosion control across the sites in  
393 all 22 studies.

### 394 **(3) Land cover effects across multiple ES**

395 We explored how the above trends in the supply of individual services translate into  
396 bundles, synergies and trade-offs among ES. For this we conducted multivariate analyses to  
397 simultaneously explore differences in the supply of multiple services across land covers  
398 (see Methods - Data analysis). These analyses allowed us to examine whether groups of ES  
399 responded similarly to differences in land cover and, conversely, whether groups of land  
400 covers played a similar role in the supply of multiple ES.

#### 401 *(a) Differences among ES from the land covers that supply them*

402 For this analysis we used a matrix of eight land covers by nine ES to identify clusters of ES  
403 based on how they are supplied by different land covers. We identified a total of five  
404 clusters, three of which were formed by only one ES while the remaining two had two and  
405 four ES each (Fig. 1). This suggests that more than half of the nine ES in this analysis are  
406 supplied in a distinct way by different land covers, and reinforces the notion that multiple  
407 land covers are required to supply a range of ES. Moreover, the separation of services into  
408 clusters of one to two also suggests that their supply is traded-off across land covers. This  
409 trade-off is acute for water-related services; most of these tend to occupy distinct spaces  
410 within the dendrogram, with water cycling standing apart from all other ES, water  
411 purification and freshwater provision in a separate cluster, and regulation of water timing  
412 and flows in a single branch close to global climate regulation and nutrient cycling (Fig. 1).  
413 The trade-off between water cycling and regulation of water timing and flows is probably  
414 because land covers that allow for increased runoff and present low water retention (such  
415 as harvested forests, croplands and built-up areas) deliver more of the water cycling  
416 service than land covers that promote soil water storage and, consequently, perform better  
417 in regulating water timing and flows (e.g., broadleaved indigenous hardwoods, indigenous  
418 forests and low producing grasslands). Freshwater provision and water purification form a  
419 cluster because the water quality aspect of their supply was assessed with the same  
420 indicators for both services (Supplementary Dataset 3) and, in both cases, greater service  
421 supply came from land covers contributing to enhanced water quality (such as tall tussock  
422 grassland and indigenous forest; Figs. S17 and S19, Supplementary Results 2).

423 In contrast to the water-related ES, those more closely linked to the soil system (nutrient  
424 cycling and soil formation) are found closer to each other in Fig. 1, and appear to be  
425 delivered similarly across land covers (Figs. S11 and S15, Supplementary Results 2). In our  
426 analysis, global climate regulation falls under this broad group of services and is closely  
427 linked to nutrient cycling (Fig. 1). This is likely due to the indicators shared by both  
428 (Supplementary Dataset 3) and a gap in our database with respect to the contribution of  
429 vegetation and livestock in greenhouse gas fluxes. In New Zealand, these contributions are  
430 well studied within a given land cover, but the lack of comparisons across land covers and  
431 uses prevented us from making a more comprehensive quantification of how this service is  
432 supplied.

### 433 *(b) Differences among land covers in their supply of services*

434 Our analysis of how land covers compared against each other in their supply of ES was  
435 based on a matrix of nine land covers by eight ES. We found a gradient of land covers that  
436 separates those with lower production from the high value production systems (Fig. 2).  
437 Land covers with high production value and dominated by exotic vegetation cover  
438 (croplands, high producing exotic grassland, exotic and harvested forests) occupied  
439 separate clusters from those with low or no production and primarily native components  
440 in their vegetation cover (tall tussock and low producing grassland, manuka and/or kanuka  
441 and indigenous forest). Likewise, with the exception of low producing grassland, land  
442 covers with forest vegetation cover occupied separate clusters from those with a more  
443 open vegetation cover.

444 The clusters with single land covers in Fig. 2 appear to specialize in supplying high levels of  
445 only one to three of the nine ES used in the analysis. Tall tussock grassland supplies high  
446 levels of water purification and freshwater provision, while manuka and/or kanuka (a  
447 successional land cover) is noted for soil formation and regulation of water and timing of  
448 flows; short-rotation cropland ranks high in supplying primary production. In contrast, the  
449 three clusters with pairs of land covers in Fig. 2 exhibit a more uniform supply of the  
450 different ES. Nevertheless, each of these three clusters also appears to supply a distinct ES  
451 bundle. The cluster formed by exotic and harvested forests supplies a bundle with high



452 biomass production and habitat provision while the cluster formed by indigenous forest  
453 and low producing grassland supplies a bundle specializing in purifying, providing and  
454 regulating the flow of water. Lastly, the cluster formed by high producing exotic grassland  
455 and orchard, vineyard and other perennial crops appears to supply even (yet not  
456 necessarily high) levels of all ES.

457 Greater differences in ES supply can be inferred from the larger differences in the height at  
458 which clusters separate from each other (Fig. 2). Consequently, in Fig. 2, the clusters with  
459 two production land covers (harvested and exotic forest plus high producing exotic  
460 grassland and orchard, vineyard & other perennial crops) are similar in their supply of ES  
461 but differ from the cluster with indigenous forest and low producing grassland. In turn,  
462 these three clusters with pairs of land covers are more similar to each other (indicated by  
463 the lower branch point) than they are to the clusters with single land covers. The clusters  
464 with pairs of land covers are also more close to the short-rotation cropland than to tall  
465 tussock grassland and manuka and/or kanuka, which are more similar to each other than  
466 they are to the rest of the land covers.

467 The trade-off in service supply between production and non-production land covers was  
468 statistically significant (PERMANOVA, Pseudo  $F_{1,6} = 3.064$ , partial  $R^2 = 0.312$ ,  $p < 0.05$ ;  
469 detailed results in Supplementary Results 4). The assumption of homogeneous dispersion  
470 between both groups was met ( $F_{1,8} = 0.718$ ,  $p > 0.05$ ), suggesting that neither supplies a  
471 greater range of ES among its different land covers. Conversely, the separation between  
472 forested and non-forested land covers did not significantly explain the distribution of land  
473 covers in ES space (Pseudo  $F_{1,6} = 0.536$ , partial  $R^2 = 0.055$ ,  $p > 0.05$ ; see also Supplementary  
474 Results 4) nor did the interaction between forested/non-forested and production/non-  
475 production (Pseudo  $F_{1,6} = 1.159$ , partial  $R^2 = 0.118$ ,  $p > 0.05$ ; Supplementary Results 4).

#### 476 **IV. DISCUSSION**

477 We have synthesized over 40 years of quantitative primary evidence on the ES supplied by  
478 different land cover types at a national scale, and used this to identify bundles and trade-  
479 offs among ES, as well as general land cover characteristics driving these associations.  
480 Overall, we found strong evidence that high-value production land covers supplied a

481 different set of non-market services than all the land covers with low or no production and  
482 native elements in their vegetation cover. Together, land covers with low or no production  
483 outperformed the production ones in supplying several supporting and regulating ES (e.g.,  
484 freshwater provision, disease mitigation and regulation of water timing and flows). In  
485 contrast, most production land covers specialized in supplying primary production.

486 Interestingly, forest cover (native or exotic) was not associated with significant differences  
487 in the suite of services supplied. Instead, we observed a close affinity between land covers  
488 with contrasting forest covers (e.g., between low producing grassland and indigenous  
489 forest and between exotic forests and high producing exotic grasslands) in their supply of  
490 several ES including water purification and regulation of water and timing of flows. Only  
491 for habitat provision did we observe that land covers with a forest cover (indigenous forest  
492 and exotic forest - harvested and unharvested) performed better than those without a  
493 forest cover in service supply.

494 In New Zealand, production land covers are dominant, with exotic forests, high producing  
495 exotic grasslands, croplands, and orchards/vineyards occupying 42% of the country's  
496 terrestrial area in 2012 (Landcare Research, 2015). Our assessment, like other ES  
497 assessments elsewhere (Costanza *et al.*, 2014), shows that decisions on ecosystem  
498 management (such as those leading to the dominance of production land covers) reflect  
499 preferences for a set of ES over others. Specifically, the trade-offs we find between  
500 production and low or no production land covers illustrate how the preference for ES with  
501 a high market value and short-term returns occurs at the expense of ES that have a non-  
502 market value but are essential for sustained, long-term human well-being (Rodríguez-  
503 Loinaz, Alday, & Onaindia, 2015).

504 The above findings resonate with the recommendations of Foley and colleagues (2011)  
505 with respect to halting indiscriminate expansion of agriculture into sensitive ecosystems.  
506 However, our findings also suggest that, at the landscape scale, the trade-offs between the  
507 ES supplied by production and non-production land covers are not solved with a single  
508 land cover. Even for the ES that were best delivered by land covers with no production, we  
509 did not find evidence of a single land cover consistently performing better than the rest in

510 the supply of all ES. Therefore, a landscape with a mosaic of these land covers is more likely  
511 to offer a broader suite of ES than one dominated by large extents of any single low or no  
512 production land cover (Fischer, Lindenmayer, & Manning, 2006; Law *et al.*, 2015).

513 Thus, we support earlier recommendations to extend beyond the dichotomy of  
514 conservation vs. production land into a more a comprehensive management (Grau,  
515 Kuemmerle, & Macchi, 2013; Tschardtke *et al.*, 2005). Such management could, for  
516 example, contemplate the extension or restoration of under-represented native land uses  
517 at strategic sites where intensive use is not matched by increased production yield, to  
518 promote the supply of critical ES or broaden the existing suite. To this end, management  
519 will need to be informed by a comprehensive understanding of how ES can scale up from  
520 individual land use units and how the relative sizes of different land use units within a  
521 landscape can affect ES supply.

522 Our analysis shows that low-intensity production land covers that retain some native  
523 vegetation (i.e. the low producing grasslands in our dataset) can approach native land  
524 covers (indigenous forests) in terms of overall ES supply. These low-intensity production  
525 land covers demonstrate that production and a suite of other ES can be jointly delivered,  
526 providing empirical support to the notion of managed ecosystems with “restored” ES  
527 proposed by Foley *et al.* (2005). Importantly, we identified great variability in how land  
528 covers supplied certain ES, despite there being high replication in our evidence base for  
529 these effects (e.g., erosion control by high producing exotic grasslands, indigenous and  
530 exotic forests). This suggests that local environmental conditions (e.g., slope) and  
531 management practices can significantly alter how a given land use affects ES supply  
532 (Felipe-Lucia *et al.*, 2018). In turn, this implies some potential to improve ES supply by  
533 adjusting management practices within specific land uses (Guerra & Pinto-Correia, 2016;  
534 Pang *et al.*, 2017) or better incorporating local environmental conditions into land-use  
535 decisions. Within individual land uses, decisions on which practices to adopt will require  
536 detailed research on the effects of different management regimes on ES supply (Guerra &  
537 Pinto-Correia, 2016; Maseyk, Dominati, & Mackay, 2018), as well as an understanding of  
538 the extent to which the plasticity in ES supply is constrained (or favored) by environmental  
539 factors.

540 A critical challenge in applying the ES framework to spatial and environmental planning is  
541 understanding the extent to which different land uses affect ES supply (Braat & Groot,  
542 2012). The uneven coverage of different ES that we observed in the literature reflects both  
543 the variable difficulty of quantifying the supply for different ES and the likely relevance of  
544 comparing the supply of certain ES among land uses. Within our dataset, supporting and  
545 regulating ES are best represented. In the global literature, regulating ES are also the most  
546 commonly quantified and mapped category, however, they are usually followed by  
547 provisioning ES, while the evidence on supporting ES is scarce (Howe *et al.*, 2014; Malinga  
548 *et al.*, 2015; Martínez-Harms & Balvanera, 2012; Crossman *et al.*, 2013). The limited  
549 representation of provisioning ES in our dataset possibly occurred because most  
550 provisioning ES (e.g., milk, timber) are linked to single or few land covers and,  
551 consequently, are unlikely to be compared across land covers. Such services, however,  
552 enter the market directly and can be more readily quantified in monetary terms. In  
553 contrast, the supporting and regulating ES that predominate in our dataset usually  
554 translate to externalities in the context of production systems, and are likely more readily  
555 quantified through biophysical indicators than monetary units (Howe *et al.*, 2014; Czúcz *et*  
556 *al.*, 2018).

557 Cultural ES are poorly represented in our database, with the few indicators for this  
558 category all being shared with the capture fisheries provisioning service, because they  
559 pertain to eels, which are of cultural significance to Māori in New Zealand. Cultural ES have  
560 non-material and ideological dimensions that are not readily quantified and, thus, are not  
561 well represented even within the emerging body of specialized literature on ES supply  
562 assessment (Hernández-Morcillo, Plieninger, & Bieling, 2013). Moreover, it has been  
563 suggested that cultural ES escape the instrumental value domain present in the ES  
564 framework. Instead, they fall under the relational domain, whereby value is not solely  
565 defined in terms of the direct benefits derived from an ecosystem, but also in terms of the  
566 social webs of desired and actual relationships constructed around that ecosystem or its  
567 components (Chan *et al.*, 2016). Consequently, for these ES, a quantitative approach like  
568 ours should be complemented with assessments that address the relational dimensions of

569 the values people hold for the natural elements in different land uses to better represent  
570 their importance in a cultural context (Lyver *et al.*, 2017).

571 Individual ES are defined to encompass distinct processes and values, but these are often  
572 quantified by overlapping sets of indicators (Czúcz *et al.*, 2018). For example, in our dataset  
573 indicators from water and soil pertained to more than one ES (e.g., water purification and  
574 provision of freshwater both share indicators of water quality, while erosion control and  
575 soil formation share indicators on soil stability). Ecosystem service indicators can also  
576 occupy different positions in the spectrum connecting the supply and demand end of ES  
577 (Villamagna, Angermeier, & Bennett, 2013). Here we have focused exclusively on the  
578 supply end and, more specifically, on the capacity of land covers to provide ES rather than  
579 on their actual flow or delivery as benefits perceived by a specific group of individuals.

580 Since the Millennium Ecosystem Assessment was released, there have been initiatives to  
581 redefine ES and their categories (TEEB, 2010; CICES, 2018). Here we argue that future  
582 work in determining how to best quantify ES, their potential and realized delivery, and  
583 their spatio-temporal variation, will be at least as important as refining their taxonomy.  
584 Furthermore, if a focus on quantifying ES should reveal aspects of services that are best left  
585 unquantified (such as the relational domain of cultural ES), this could also lead to the  
586 development of alternative ways of assessing those ES, which could then be applied in  
587 combination with quantitative approaches like the one we have developed here. Recent  
588 developments, like the concept of nature's contributions to people and the framework for  
589 their assessment proposed by Díaz and colleagues (2018), provide an opportunity for  
590 reconciling these issues.

591 Our work suggests that there is great potential in using existing data for assessing ES  
592 bundles and interactions more cost-efficiently than through direct field observation. Yet, an  
593 important caveat to our approach stems from underlying factors that are correlated with  
594 land use and impact the supply of certain ES. For example, since land uses such as forestry  
595 and natural habitats are frequently found on steep slopes, this physical characteristic will  
596 likely influence erosion control in a way that co-varies with land cover. At the most extreme  
597 end, some ES may not be related to land cover, but rather respond to other spatially

598 variable factors (e.g., aesthetic values from housing location on hillsides). These factors  
599 were beyond the scope of our work, as we did not separate the effects of spatial factors  
600 from those of land cover. In fact, one could argue that land use is not selected  
601 independently from the local environment, so these factors are a frequent (though not  
602 universal) component of any land use and its influence on ES. Nevertheless, future  
603 approaches may benefit from examining how these factors affect the between- or within-  
604 land-use differences in ES supply. This distinction would allow a shift from comparisons  
605 across locations (as we examined here), which allow comparisons of existing landscapes, to  
606 the predicted impacts of land use change on ES at any location. However, such predictions  
607 would also need to incorporate legacy effects of past land uses, as these can have enduring  
608 consequences on ecosystem functioning (Dallimer *et al.*, 2015; Perring *et al.*, 2016).

609 Our method for using existing data to assess bundles, trade-offs and synergies in ES supply  
610 across land covers can facilitate the comparison of entire landscapes, for example, by  
611 projecting land covers or land uses into multidimensional ES-supply space (Fig. 3). This  
612 mapping could reveal two key characteristics for land-use planning: 1) land covers/uses  
613 that cluster together, and thus exhibit redundancy (and potentially resilience) in ES supply,  
614 or 2) land covers/uses that occur at opposite extremes of ES-supply space, and are  
615 therefore likely to exhibit complementary roles in their service supply (as ES are traded off  
616 between them). In addition, the total hyper-volume occupied by all land covers/uses in this  
617 multidimensional ES-supply space (ordination plots in Fig. 3) can indicate the diversity of  
618 ES supplied by all land covers/uses within a given landscape (analogous to interpretations  
619 of species in trait space; Laliberte & Legendre, 2010), which could be used in comparisons  
620 of existing landscapes or future scenarios.

621 For example, Case 3 in Fig. 3, has the greatest diversity of land covers and thus occupies the  
622 greatest hyper-volume in multidimensional ES-supply space. However, there are few land  
623 covers at the edge of this volume, such that the full array of services has low redundancy  
624 compared with Case 2 where land covers cluster around one location in ES-supply space.  
625 Because the entire ES-supply space may include areas that do not correspond to any  
626 configuration of ES, this approach is best applied for comparing landscapes rather than as  
627 an absolute measure of ES in one location.

628 Finally, mapping ES in multidimensional land-cover or land-use space (e.g., Fig. 1) allows  
629 the identification of ES bundles that respond similarly to land cover / land use. These  
630 bundles can then be used to identify management decisions that minimize disruption of  
631 service flows. Our approach opens the way for actively incorporating existing sources of  
632 information into ES research and informing practitioners to shape land systems that  
633 sustainably support human well-being.

## 634 **V. CONCLUSIONS**

635 (1) Our synthesis of land cover supply of ES in New Zealand revealed a consistent trade-  
636 off in the services supplied by high-value production land covers vs. those with low or  
637 no production and native elements in their vegetation cover. While production land  
638 covers specialized in the supply of primary production, low or no production land  
639 covers supplied a broad array of supporting and regulating ES. We did not find any  
640 evidence that forest cover was associated with any distinct patterns of ES supply.

641 (2) We show that the trade-off between ES supplied by production and non-production  
642 land covers is not solved with a single land cover. In contrast to earlier suggestions  
643 that a single natural ecosystem can support multiple ES at high levels (Foley *et al.*,  
644 2005), our analyses reveal that a mosaic of different land covers will be required to  
645 supply multiple ES within a landscape.

646 (3) We show that exploring how different land covers map on to multidimensional ES  
647 space allows for an assessment of how diverse and resilient different combinations of  
648 land covers can be in their supply of ES. Such assessments can effectively support land  
649 use planning decisions beyond considerations of the specific identity of each land  
650 cover and the ES it supplies.

651 (4) Our work suggests that there is great potential in using existing data for assessing ES  
652 bundles and interactions more cost-efficiently than through direct field observation.  
653 However, we also find that effective landscape management of ES will require further  
654 research on how environmental and land management factors can mediate the effects  
655 of land use on ES supply. We anticipate that these effects will differ across ES and will

656 be more pronounced for ES where there is high variability in the supply by individual  
657 land covers (e.g., erosion control in our dataset).

## 658 **VI. ACKNOWLEDGEMENTS**

659 We thank Melanie Hamzah for her assistance in the abstract screening and Sol Heber,  
660 Sophie Hunt, Jessica Furlong & Matthew Scott for their help with the full-text assessment  
661 and data extraction to collate our dataset. We also thank thematic experts Karen L. Adair  
662 (soil microbiology), Catherine M. Febria (freshwater ecology), Leo Condron (soil  
663 biogeochemistry), Matthew Turnbull (plant physiological ecology) & Angus McIntosh  
664 (freshwater ecology) for help with interpreting potential ecosystem service indicators. We  
665 are grateful to Daniel Stouffer and Melissa Ann Broussard for their valuable technical  
666 advice and members of the Stouffer and Tylianakis lab for their comments and useful  
667 discussions. This work was funded by the Ministry of Business, Innovation and  
668 Employment, NZ programme BEST: Building biodiversity into an ecosystem service-based  
669 approach for resource management (C09X1307). We thank Suzie Greenhalgh for  
670 coordinating this programme and providing helpful discussions.

## 671 **VII. AUTHOR CONTRIBUTIONS**

672 JMT, EGB and CGC conceived and developed the original project concept; JMT and EGB  
673 secured the funding for the project; all authors contributed to the study design; data was  
674 acquired by CGC, with input from JMT and EGB; CGC, JMT, SN and ML contributed to the  
675 data analysis; CGC drafted the manuscript; JMT, SN, ML and EGB made revisions and critical  
676 appraisals of the manuscript.

## 677 **VIII. REFERENCES**

678 *References marked with asterisk have been cited within the supporting information.*

679 ALDANA DOMÍNGUEZ, J., IGNACIO, P., JORGELINA, G.A., CECILIA, A.S., CARLOS, M. & FRANCISCO, N.  
680 (2019) Assessing the effects of past and future land cover changes in ecosystem services,  
681 disservices and biodiversity: A case study in Barranquilla Metropolitan Area (BMA),  
682 Colombia. *Ecosystem Services* **37**, 100915. Elsevier B.V.



- 683 AMENT, J.M., MOORE, C.A., HERBST, M. & CUMMING, G.S. (2017) Cultural ecosystem services in  
684 protected areas: Understanding bundles, trade-offs, and synergies. *Conservation Letters* **10**,  
685 439–449.
- 686 ANDREW, M.E., WULDER, M.A., NELSON, T.A. & COOPS, N.C. (2015) Spatial data, analysis  
687 approaches, and information needs for spatial ecosystem service assessments: A review.  
688 *GIScience and Remote Sensing* **52**, 344–373. Taylor & Francis.
- 689 BATEMAN, I.J., HARWOOD, A.R., MACE, G.M., WATSON, R.T., ABSON, D.J., ANDREWS, B., BINNER, A.,  
690 CROWE, A., DAY, B.H., DUGDALE, S., FEZZI, C., FODEN, J., HADLEY, D., HAINES-YOUNG, R., HULME, M., ET  
691 AL. (2013) Bringing ecosystem services into economic decision-making: land use in the  
692 United Kingdom. *Science* **341**, 45–50.
- 693 BRAAT, L.C. & GROOT, R.S. DE (2012) The ecosystem services agenda: bridging the worlds of  
694 natural science and economics, conservation and development, and public and private  
695 policy. *Ecosystem Services* **1**, 4–15. Elsevier.
- 696 CEE (2013) Guidelines for systematic review and evidence synthesis in environmental  
697 management - version 4.2. In p. 80. Centre for Evidence Based Conservation.
- 698 CHAN, K.M.A., BALVANERA, P., BENESSIAH, K., CHAPMAN, M., DÍAZ, S., GÓMEZ-BAGGETHUN, E., GOULD,  
699 R., HANNAHS, N., JAX, K., KLAIN, S., LUCK, G.W., MARTÍN-LÓPEZ, B., MURACA, B., NORTON, B., OTT, K.,  
700 ET AL. (2016) Opinion: Why protect nature? Rethinking values and the environment.  
701 *Proceedings of the National Academy of Sciences* **113**, 1462–1465.
- 702 CHAUDHARY, S., MCGREGOR, A., HOUSTON, D. & CHETTRI, N. (2015) The evolution of ecosystem  
703 services: A time series and discourse-centered analysis. *Environmental Science and Policy*  
704 **54**, 25–34. Elsevier Ltd.
- 705 CHEN, W., CHI, G. & LI, J. (2019) The spatial association of ecosystem services with land use  
706 and land cover change at the county level in China, 1995–2015. *Science of the Total*  
707 *Environment* **669**, 459–470. Elsevier B.V.
- 708 CICES (2018) Common International Classification of Ecosystem Services (CICES) V5.1  
709 (January 2018). <https://cices.eu/> [accessed 2 February 2018].

- 710 COSTANZA, R., GROOT, R.S. DE, SUTTON, P., PLOEG, S. VAN DER, ANDERSON, S.J., KUBISZEWSKI, I.,  
711 FARBER, S. & TURNER, R.K. (2014) Changes in the global value of ecosystem services. *Global*  
712 *Environmental Change* **26**, 152–158. Elsevier Ltd.
- 713 CRAIG, J., ANDERSON, S., CLOUT, M., CREESE, B., MITCHELL, N., OGDEN, J., ROBERTS, M. & USSHER, G.  
714 (2000) Conservation issues in New Zealand. *Annual Review of Ecology, Evolution and*  
715 *Systematics* **31**, 61–78.
- 716 CROSSMAN, N.D., BURKHARD, B., NEDKOV, S., WILLEMEN, L., PETZ, K., PALOMO, I., DRAKOU, E.G.,  
717 MARTÍN-LÓPEZ, B., MCPHEARSON, T., BOYANOVA, K., ALKEMADE, R., EGOH, B., DUNBAR, M.B. & MAES,  
718 J. (2013) A blueprint for mapping and modelling ecosystem services. *Ecosystem Services* **4**,  
719 4–14.
- 720 CZÚCZ, B., ARANY, I., POTSCHIN-YOUNG, M., BERECZKI, K., KERTÉSZ, M., KISS, M., ASZALÓS, R. &  
721 HAINES-YOUNG, R. (2018) Where concepts meet the real world: A systematic review of  
722 ecosystem service indicators and their classification using CICES. *Ecosystem Services* **29**,  
723 145–157.
- 724 DALE, V.H., BROWN, S., HAEUBER, R.A., HOBBS, N.T., HUNTLY, N., NAIMAN, R.J., RIEBSAME, W.E.,  
725 TURNER, M.G. & VALONE, T.J. (2000) Ecological principles and guidelines for managing the use  
726 of land. *Ecological Applications* **10**, 639–670.
- 727 DALLIMER, M., DAVIES, Z.G., DIAZ-PORRAS, D.F., IRVINE, K.N., MALTBY, L., WARREN, P.H.,  
728 ARMSWORTH, P.R. & GASTON, K.J. (2015) Historical influences on the current provision of  
729 multiple ecosystem services. *Global Environmental Change* **31**, 307–317. Elsevier Ltd.
- 730 DÍAZ, S., PASCUAL, U., STENSEKE, M., MARTÍN-LÓPEZ, B., WATSON, R.T., MOLNÁR, Z., HILL, R., CHAN,  
731 K.M.A., BASTE, I.A., BRAUMAN, K.A., POLASKY, S., CHURCH, A., LONSDALE, M., LARIGAUDERIE, A.,  
732 LEADLEY, P.W., ET AL. (2018) Assessing nature’s contributions to people. *Science* **359**, 270–  
733 272.
- 734 DUARTE, G.T., SANTOS, P.M., CORNELISSEN, T.G., RIBEIRO, M.C. & PAGLIA, A.P. (2018) The effects of  
735 landscape patterns on ecosystem services: meta-analyses of landscape services. *Landscape*  
736 *Ecology* **33**, 1247–1257. Springer Netherlands.

- 737 FELIPE-LUCIA, M.R., SOLIVERES, S., PENONE, C., MANNING, P., PLAS, F. VAN DER, BOCH, S., PRATI, D.,  
738 AMMER, C., SCHALL, P., GOSSNER, M.M., BAUHUS, J., BUSCOT, F., BLASER, S., BLÜTHGEN, N., FRUTOS, A.  
739 DE, ET AL. (2018) Multiple forest attributes underpin the supply of multiple ecosystem  
740 services. *Nature Communications* **9**, 4839.
- 741 FISCHER, J., LINDENMAYER, D.B. & MANNING, A.D. (2006) Biodiversity, ecosystem function and  
742 resilience: Ten guiding principles for off-reserve conservation. *Frontiers in Ecology and the*  
743 *Environment* **4**, 80–86.
- 744 FISHER, B., TURNER, R.K. & MORLING, P. (2009) Defining and classifying ecosystem services for  
745 decision making. *Ecological Economics* **68**, 643–653. Elsevier B.V.
- 746 FOLEY, J.A., DEFRIES, R., ASNER, G.P., BARFORD, C., BONAN, G., CARPENTER, S.R., CHAPIN, F.S.I., COE,  
747 M.T., DAILY, G.C., GIBBS, H.K., HELKOWSKI, J.H., HOLLOWAY, T., HOWARD, E.A., KUCHARIK, C.J.,  
748 MONFREDA, C., ET AL. (2005) Global consequences of land use. *Science* **8**, 570–574.
- 749 FOLEY, J.A., RAMANKUTTY, N., BRAUMAN, K.A., CASSIDY, E.S., GERBER, J.S., JOHNSTON, M., MUELLER,  
750 N.D., O'CONNELL, C., RAY, D.K., WEST, P.C., BALZER, C., BENNETT, E.M., CARPENTER, S.R., HILL, J.,  
751 MONFREDA, C., ET AL. (2011) Solutions for a cultivated planet. *Nature* **478**, 337–342.
- 752 GODFRAY, H.C.J., BEDDINGTON, J.R., CRUTE, I.R., HADDAD, L., LAWRENCE, D., MUIR, J.F., PRETTY, J.,  
753 ROBINSON, S., THOMAS, S.M. & TOULMIN, C. (2010) Food security: The challenge of feeding 9  
754 billion people. *Science* **327**, 812–818.
- 755 \* GRAAFF, M.-A. DE, GROENIGEN, K.-J. VAN, SIX, J., HUNGATE, B. & KESSEL, C. VAN (2006) Interactions  
756 between plant growth and soil nutrient cycling under elevated CO<sub>2</sub>: a meta-analysis.  
757 *Global Change Biology* **12**, 2077–2091.
- 758 GRAU, R., KUEMMERLE, T. & MACCHI, L. (2013) Beyond 'land sparing versus land sharing':  
759 Environmental heterogeneity, globalization and the balance between agricultural  
760 production and nature conservation. *Current Opinion in Environmental Sustainability* **5**,  
761 477–483. Elsevier B.V.
- 762 GROOT, R.S. DE, BRANDER, L., PLOEG, S. VAN DER, COSTANZA, R., BERNARD, F., BRAAT, L.C., CHRISTIE,  
763 M., CROSSMAN, N.D., GHERMANDI, A., HEIN, L., HUSSAIN, S., KUMAR, P., MCVITTIE, A., PORTELA, R.,

- 764 RODRIGUEZ, L.C., ET AL. (2012) Global estimates of the value of ecosystems and their services  
765 in monetary units. *Ecosystem Services* **1**, 50–61. Elsevier.
- 766 GUERRA, C.A. & PINTO-CORREIA, T. (2016) Linking farm management and ecosystem service  
767 provision: Challenges and opportunities for soil erosion prevention in Mediterranean silvo-  
768 pastoral systems. *Land Use Policy* **51**, 54–65. Elsevier Ltd.
- 769 GUERRY, A.D., POLASKY, S., LUBCHENCO, J., CHAPLIN-KRAMER, R., DAILY, G.C., GRIFFIN, R.,  
770 RUCKELSHAUS, M., BATEMAN, I.J., DURAIAPPAH, A., ELMQVIST, T., FELDMAN, M.W., FOLKE, C.,  
771 HOEKSTRA, J., KAREIVA, P.M., KEELER, B.L., ET AL. (2015) Natural capital and ecosystem services  
772 informing decisions: From promise to practice. *Proceedings of the National Academy of*  
773 *Sciences* **112**, 7348–7355.
- 774 HERNÁNDEZ-MORCILLO, M., PLIENINGER, T. & BIELING, C. (2013) An empirical review of cultural  
775 ecosystem service indicators. *Ecological Indicators* **29**, 434–444. Elsevier Ltd.
- 776 HOWE, C., SUICH, H., VIRA, B. & MACE, G.M. (2014) Creating win-wins from trade-offs?  
777 Ecosystem services for human well-being: A meta-analysis of ecosystem service trade-offs  
778 and synergies in the real world. *Global Environmental Change* **28**, 263–275. Elsevier Ltd.
- 779 JACOBS, S., BURKHARD, B., VAN DAELE, T., STAES, J. & SCHNEIDERS, A. (2015) 'The Matrix Reloaded':  
780 A review of expert knowledge use for mapping ecosystem services. *Ecological Modelling*  
781 **295**, 21–30. Elsevier B.V.
- 782 LALIBERTE, E. & LEGENDRE, P. (2010) A distance-based framework for measuring functional  
783 diversity from multiple traits. *Ecology* **91**, 299–305.
- 784 LAMBIN, E.F. & MEYFROIDT, P. (2011) Global land use change, economic globalization, and the  
785 looming land scarcity. *Proceedings of the National Academy of Sciences* **108**, 3465–3472.
- 786 LANDCARE RESEARCH (2015) Land Cover Database version 4.1, mainland New Zealand. Land  
787 Resource Information Systems Portal. [Http://www.lcdb.scinfo.org.nz/home](http://www.lcdb.scinfo.org.nz/home).

- 788 \* LAVELLE, P., DUGDALE, R., SCHOLES, R., BERHE, A., CARPENTER, E., CODISPOTI, L., IZAC, A., LEMOALLE,  
789 J., LUIZAO, F., SCHOLES, M., TREGUER, P. & WARD, B. (2005) Nutrient Cycling. In *Ecosystems and*  
790 *human well-being: Current state and trends assessment* pp. 333–353.
- 791 LAW, E.A., MEIJAARD, E., BRYAN, B.A., MALLAWAARACHCHI, T., KOH, L.P. & WILSON, K.A. (2015)  
792 Better land-use allocation outperforms land sparing and land sharing approaches to  
793 conservation in Central Kalimantan, Indonesia. *Biological Conservation* **186**, 276–286.  
794 Elsevier Ltd.
- 795 LEE, H. & LAUTENBACH, S. (2016) A quantitative review of relationships between ecosystem  
796 services. *Ecological Indicators* **66**, 340–351. Elsevier Ltd.
- 797 \* LEWIS, S. & CLARKE, M. (2001) Forest plots: trying to see the wood and the trees. *British*  
798 *Medical Journal* **322**, 1479–1480.
- 799 LYVER, P.O.B., TIMOTI, P., JONES, C.J., RICHARDSON, S.J., TAHI, B.L. & GREENHALGH, S. (2017) An  
800 indigenous community-based monitoring system for assessing forest health in New  
801 Zealand. *Biodiversity and Conservation* **26**, 3183–3212. Springer Netherlands.
- 802 \* MACLEOD, C.J. & MOLLER, H. (2006) Intensification and diversification of New Zealand  
803 agriculture since 1960: An evaluation of current indicators of land use change. *Agriculture,*  
804 *Ecosystems and Environment* **115**, 201–218.
- 805 MAECHLER, M., ROUSSEUW, P., STRUYF, A., HUBERT, M., HORNIK, K., STUDER, M., ROUDIER, P. &  
806 GONZALEZ, J. (2019) Package cluster - "Finding groups in data": Cluster analysis extended.  
807 <https://cran.r-project.org/web/packages/cluster/index.html>.
- 808 MALINGA, R., GORDON, L.J., JEWITT, G. & LINDBORG, R. (2015) Mapping ecosystem services across  
809 scales and continents - A review. *Ecosystem Services* **13**, 57–63. Elsevier.
- 810 MARTÍNEZ-HARMS, M.J. & BALVANERA, P. (2012) Methods for mapping ecosystem service  
811 supply: a review. *International Journal of Biodiversity Science, Ecosystem Services &*  
812 *Management* **8**, 17–25.

- 813 MASEYK, F.J.F., DOMINATI, E.J. & MACKAY, A.D. (2018) Change in ecosystem service provision  
814 within a lowland dairy landscape under different riparian margin scenarios. *International*  
815 *Journal of Biodiversity Science, Ecosystem Services and Management* **14**, 17–31. Taylor &  
816 Francis.
- 817 \* MEA (2005) *Ecosystems and human well-being: Synthesis*. Island Press, Washington.
- 818 MOUCHET, M.A., LAMARQUE, P., MARTÍN-LÓPEZ, B., CROUZAT, E., GOS, P., BYCZEK, C. & LAVOREL, S.  
819 (2014) An interdisciplinary methodological guide for quantifying associations between  
820 ecosystem services. *Global Environmental Change* **28**, 298–308.
- 821 NELSON, E., MENDOZA, G., REGETZ, J., POLASKY, S., TALLIS, H., CAMERON, D.R., CHAN, K.M.A., DAILY,  
822 G.C., GOLDSTEIN, J., KAREIVA, P.M., LONSDORF, E., NAIDOO, R., RICKETTS, T.H. & SHAW, M.R. (2009)  
823 Modeling multiple ecosystem services, biodiversity conservation, commodity production,  
824 and tradeoffs at landscape scales. *Frontiers in Ecology and the Environment* **7**, 4–11.
- 825 NIETO-ROMERO, M., OTEROS-ROZAS, E., GONZÁLEZ, J.A. & MARTÍN-LÓPEZ, B. (2014) Exploring the  
826 knowledge landscape of ecosystem services assessments in Mediterranean  
827 agroecosystems: Insights for future research. *Environmental Science & Policy* **37**, 121–133.
- 828 OKSANEN, J., BLANCHET, F.G., FRIENDLY, M., KINDT, R., LEGENDRE, P., MCGLINN, D., MINCHIN, P.R.,  
829 O'HARA, R.B., SIMPSON, G.L., SOLYMOS, P., STEVENS, M.H.H., SZOECs, E. & HELENE, W. (2019)  
830 Package 'vegan'. <https://cran.r-project.org/web/packages/vegan/index.html>.
- 831 PANG, X., NORDSTRÖM, E.M., BÖTTCHER, H., TRUBINS, R. & MÖRTBERG, U. (2017) Trade-offs and  
832 synergies among ecosystem services under different forest management scenarios – The  
833 LEcA tool. *Ecosystem Services* **28**, 67–79. Elsevier B.V.
- 834 PERRING, M.P., DE FRENNE, P., BAETEN, L., MAES, S.L., DEPAUW, L., BLONDEEL, H., CARÓN, M.M. &  
835 VERHEYEN, K. (2016) Global environmental change effects on ecosystems: The importance of  
836 land-use legacies. *Global Change Biology* **22**, 1361–1371.
- 837 QUEIROZ, C., MEACHAM, M., RICHTER, K., NORSTRÖM, A.V., ANDERSSON, E., NORBERG, J. & PETERSON, G.  
838 (2015) Mapping bundles of ecosystem services reveals distinct types of multifunctionality  
839 within a Swedish landscape. *Ambio* **44**, 89–101.

- 840 RAUDSEPP-HEARNE, C., PETERSON, G.D. & BENNETT, E.M. (2010) Ecosystem service bundles for  
841 analyzing tradeoffs in diverse landscapes. *Proceedings of the National Academy of Sciences*  
842 *of the United States of America* **107**, 5242–5247.
- 843 R CORE TEAM (2019) R: A language and environment for statistical computing. R Foundation  
844 for Statistical Computing, Vienna, Austria. <https://www.r-project.org/>.
- 845 ROBERTSON, G.P. & SWINTON, S.M. (2005) Reconciling agricultural productivity and  
846 environmental integrity : a grand for agriculture. *Frontiers in Ecology and the Environment*  
847 **3**, 38–46.
- 848 RODRÍGUEZ, J.P., BEARD, T.D., BENNETT, E.M., CUMMING, G.S., CORK, S.J., AGARD, J., DOBSON, A.P. &  
849 PETERSON, G.D. (2006) Trade-offs across space, time, and ecosystem services. *Ecology and*  
850 *Society* **11**, 28.
- 851 RODRÍGUEZ-LOINAZ, G., ALDAY, J.G. & ONAINDIA, M. (2015) Multiple ecosystem services  
852 landscape index: A tool for multifunctional landscapes conservation. *Journal of*  
853 *Environmental Management* **147**, 152–163. Elsevier Ltd.
- 854 \* ROSENBERG, M.S., ROTHSTEIN, H.R. & GUREVITCH, J. (2013) Effect sizes: conventional choices  
855 and calculations. In *Handbook of meta-analysis in ecology and evolution* pp. 61–71.  
856 Princeton University Press, Princeton
- 857 \* RÜCKER, G. & SCHWARZER, G. (2015) Ranking treatments in frequentist network meta-  
858 analysis works without resampling methods. *BMC Medical Research Methodology* **15**, 58.  
859 BMC Medical Research Methodology.
- 860 SAIDI, N. & SPRAY, C. (2018) Ecosystem services bundles: Challenges and opportunities for  
861 implementation and further research. *Environmental Research Letters* **13**, 113001. IOP  
862 Publishing.
- 863 SALANTI, G. (2012) Indirect and mixed-treatment comparison, network, or multiple-  
864 treatments meta-analysis: many names, many benefits, many concerns for the next  
865 generation evidence synthesis tool. *Research Synthesis Methods* **3**, 80–97.

- 866 \* SCHWARZER, G., CARPENTER, J.R. & RÜCKER, G. (2015) Network Meta Analysis. In *Meta-analysis*  
867 *with R* pp. 187–216. Springer US, Lexington.
- 868 SCHWARZER, G., RÜCKER, G., KRAHN, U. & KÖNIG, J. (2019) Package ‘netmeta’ - A comprehensive  
869 set of functions providing frequentist methods for network meta-analysis. [https://cran.r-](https://cran.r-project.org/web/packages/netmeta/index.html)  
870 [project.org/web/packages/netmeta/index.html](https://cran.r-project.org/web/packages/netmeta/index.html).
- 871 SPAKE, R., LASSEUR, R., CROUZAT, E., BULLOCK, J.M., LAVOREL, S., PARKS, K.E., SCHAAFSMA, M.,  
872 BENNETT, E.M., MAES, J., MULLIGAN, M., MOUCHET, M., PETERSON, G.D., SCHULP, C.J.E., THUILLER, W.,  
873 TURNER, M.G., ET AL. (2017) Unpacking ecosystem service bundles: Towards predictive  
874 mapping of synergies and trade-offs between ecosystem services. *Global Environmental*  
875 *Change* **47**, 37–50. Elsevier Ltd.
- 876 STEFFEN, W., RICHARDSON, K., ROCKSTROM, J., CORNELL, S.E., FETZER, I., BENNETT, E.M., BIGGS, R.,  
877 CARPENTER, S.R., VRIES, W. DE, WIT, C.A. DE, FOLKE, C., GERTEN, D., HEINKE, J., MACE, G.M., PERSSON,  
878 L.M., ET AL. (2015) Planetary boundaries: Guiding human development on a changing  
879 planet. *Science* **347**, 1259855–1259855.
- 880 SUTHERLAND, I.J., GERGEL, S.E. & BENNETT, E.M. (2016) Seeing the forest for its multiple  
881 ecosystem services: Indicators for cultural services in heterogeneous forests. *Ecological*  
882 *Indicators* **71**, 123–133. Elsevier Ltd.
- 883 \* TAYLOR, L.R. (1961) Aggregation, variance and the mean. *Nature* **189**, 732–735.
- 884 TEEB (2010) The Economics of Ecosystems and Biodiversity: Mainstreaming the  
885 economics of Nature: A synthesis of the approach, conclusions and recommendations of  
886 TEEB. In p. 39. United Nations Environment Programme.
- 887 \* THOMPSON, S., GRÜNER, I. & GAPARE, N. (2003) Illustrated guide to target classes of the New  
888 Zealand Land Cover Database Version 2. New Zealand Ministry for the Environment.
- 889 TSCHARNTKE, T., KLEIN, A.M., KRUESS, A., STEFFAN-DEWENTER, I. & THIES, C. (2005) Landscape  
890 perspectives on agricultural intensification and biodiversity - ecosystem service  
891 management. *Ecology Letters* **8**, 857–874.



- 892 TURNER, B.L., LAMBIN, E.F. & REENBERG, A. (2008) The emergence of land change science for  
893 global environmental change and sustainability. *Proceedings of the National Academy of*  
894 *Sciences* **105**, 20666–20671.
- 895 VILLAMAGNA, A.M., ANGERMEIER, P.L. & BENNETT, E.M. (2013) Capacity, pressure, demand, and  
896 flow: A conceptual framework for analyzing ecosystem service provision and delivery.  
897 *Ecological Complexity* **15**, 114–121. Elsevier B.V.
- 898 \* WALLACE, B.C., SMALL, K., BRODLEY, C.E., LAU, J. & TRIKALINOS, T.A. (2012) Deploying an  
899 interactive machine learning system in an evidence-based practice center. *Proceedings of*  
900 *the 2nd ACM SIGHIT symposium on International health informatics - IHI '12*, 819.
- 901 WALLACE, K.J. (2007) Classification of ecosystem services: Problems and solutions.  
902 *Biological Conservation* **139**, 235–246.
- 903 \* WAN, X., WANG, W., LIU, J. & TONG, T. (2014) Estimating the sample mean and standard  
904 deviation from the sample size, median, range and/or interquartile range. *BMC Medical*  
905 *Research Methodology* **14**, 135.

## 906 **IX. SUPPORTING INFORMATION**

907 Additional supporting information may be found online in the Supporting Information  
908 section at the end of the article.

909 **Supplementary Methods 1.** Detailed data collection and processing methods.

910 **Supplementary Methods 2.** Full search phrase for pilot and formal searches.

911 **Supplementary Methods 3.** Decision tree for full-text assessment.

912 **Supplementary Methods 4.** Conversion of confidence intervals to variance and  
913 imputation of missing values.

914 **Supplementary Methods 5.** Scree plots and land cover classification for multivariate  
915 analyses.

916 **Supplementary Results 1.** Overview of research effort for New Zealand.

917 **Supplementary Results 2.** Evidence base and network meta-analysis for individual ES.

918 **Supplementary Results 3.** Summary of log response ratios per land cover and ecosystem

- 919 service combination.
- 920 **Supplementary Results 4.** Detailed results from PERMANOVA analyses.
- 921 **Supplementary Results 5.** Data analysis with allocation of a single ES to each indicator.
- 922 **Supplementary Dataset 1.** Overview of Ecosystem Services (ES).
- 923 **Supplementary Dataset 2.** Overview of land cover classes as defined in New Zealand's
- 924 Land Cover Database (LCDB).
- 925 **Supplementary Dataset 3.** Quantitative indicators used to quantify supply of each
- 926 ecosystem service.
- 927 **Supplementary Dataset 4.** Reference list for the studies included in our meta-analysis.
- 928 **Supplementary Dataset 5** Final log Response Ratios on ecosystem service supply for
- 929 pairwise comparison of land covers in each study used in our analysis.

## 1 FIGURES

2

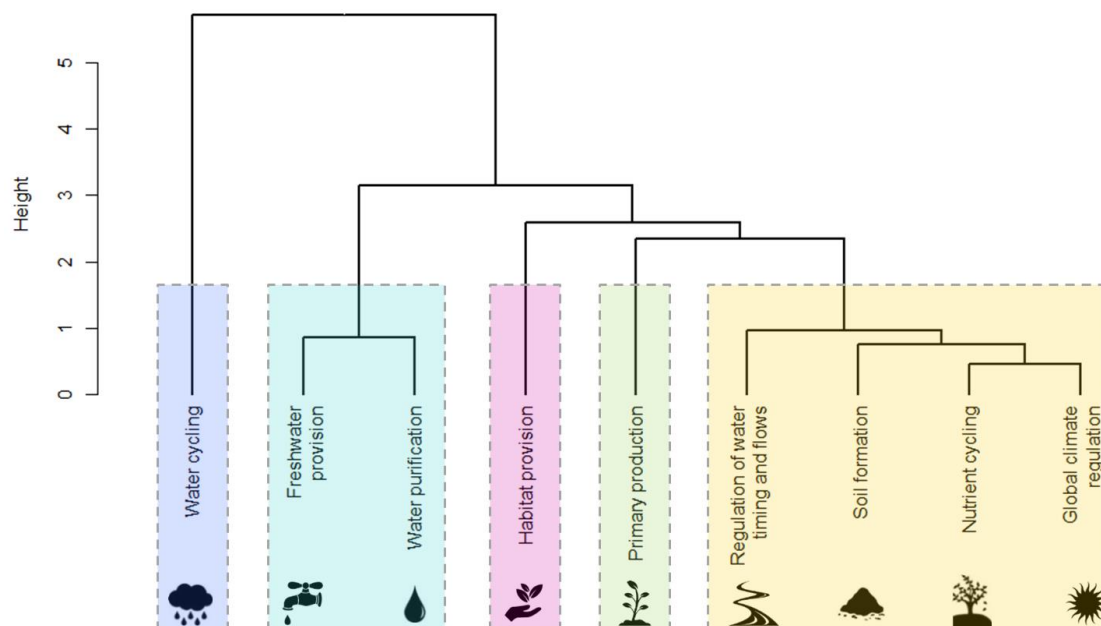

4 **Fig. 1: Hierarchical clustering of ES.** Services within the same box form a cluster (as  
5 determined by k-means cluster analysis) and are therefore supplied similarly across eight  
6 land covers (low producing grassland, tall tussock grassland, high producing exotic grassland,  
7 short - rotation cropland, indigenous forest, exotic forest, harvested forest and orchard,  
8 vineyard and other perennial crops). A greater separation between the branching points for  
9 clusters along the height axis indicates greater dissimilarity among clusters in the extent to  
10 which they are supplied by the eight land covers included in the analysis.

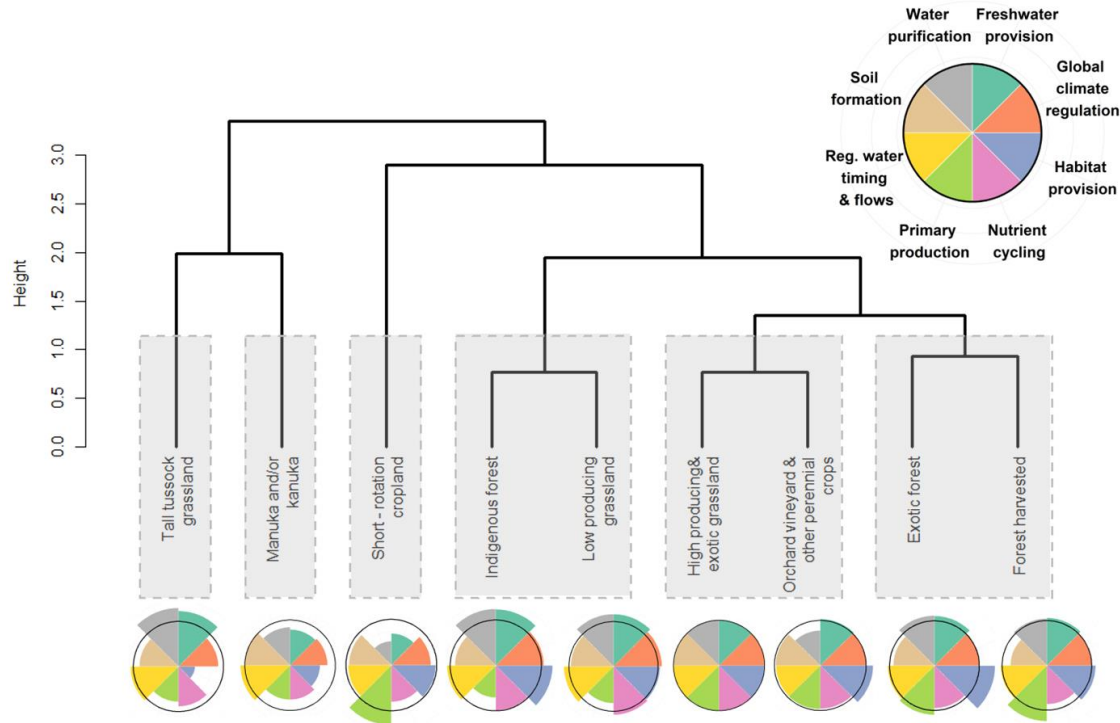

11

12 **Fig. 2: Hierarchical clustering of land covers.** Boxes enclose land covers that exhibit a  
 13 greater similarity in their supply of eight ecosystem services (habitat provision, primary  
 14 production, freshwater provision, soil formation, nutrient cycling, water purification, global  
 15 climate regulation and regulation of water timing and flows). In contrast, land covers that  
 16 merge at a greater height have a greater dissimilarity in their service supply. The flower  
 17 diagrams at the bottom illustrate how each land cover supplies each of the eight ES, with  
 18 longer petals indicating a greater supply of an ES. For comparison, the black ring around  
 19 each flower diagram marks the supply from high producing exotic grassland, the land cover  
 20 used as reference in our meta-analysis.

Case 1

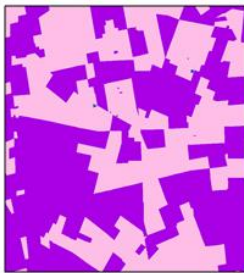

"Ecosystem services space"

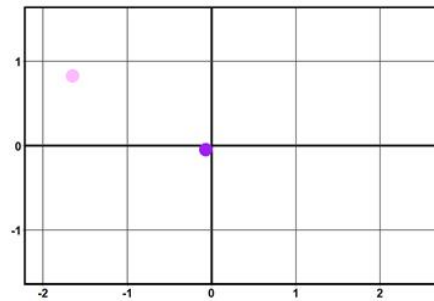

Case 2

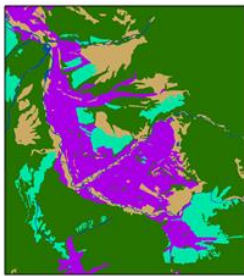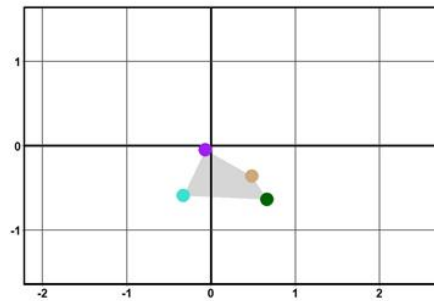

Land covers

- Broadleaved indigenous hardwoods
- Exotic forest
- Forest harvested
- High producing exotic grassland
- Indigenous forest
- Low producing grassland
- Manuka and/or kanuka
- Orchard, vineyard & other perennial crops
- Short - rotation cropland
- Tall tussock grassland

Case 3

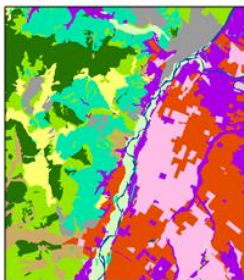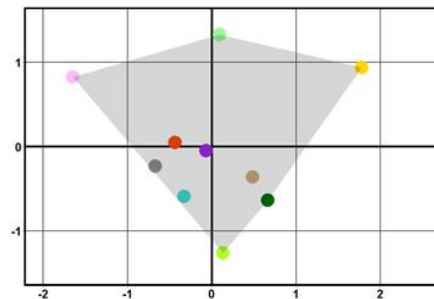

21

22 *Fig. 3: Example visualizations for exploring land cover trade-offs in the supply of*  
23 *multiple ecosystem services (ES) from entire landscapes. Quantitative measures of ES*  
24 *supply by different land uses or land covers (such as those obtained from our meta-analysis)*  
25 *can be used to generate ordinations that 'map' land covers or land uses into the*  
26 *multidimensional space of ES supply (ordination graphs). Distribution of land covers within*  
27 *that space can assist with identification of redundancies in ES supply (among land*  
28 *covers/uses that map close together) and trade-offs among land covers/uses that supply*  
29 *contrasting sets of ES and, consequently, occupy opposite extremes of the ordination space.*  
30 *Furthermore, the hypervolume enclosed by the total set of land covers/uses from a given*

31 *landscape expresses the diversity of ES provided by that landscape. As an example, our data*  
32 *can be used to compare multi-service provision for: a landscape with few, undifferentiated*  
33 *production land covers (Case 1); a landscape with a combination of some production and non-*  
34 *production land covers (Case 2) and a landscape with a broad range of production and non-*  
35 *production land covers that supply a diverse range of services (Case 3).*

36
